# Supplementary material for: Initiator tRNA genes template the 3′ CCA end at high frequencies in bacteria
Source: PubMed Central journal article supplement (PMC5143459; doi:10.1186/s12864-016-3314-x), 2016-12-08
Supplement: 12864_2016_3314_MOESM13_ESM.pdf [file 12864_2016_3314_MOESM13_ESM.pdf]

Table with columns for taxonomic classification (e.g., Phylum, Class, Order, Family, Genus, Species) and a matrix of numerical values representing sequence alignment or similarity metrics. The table lists various bacterial taxa such as Cyanobacteria, Proteobacteria, and Chloroflexi, along with their corresponding NCBI accession numbers and alignment scores.





| ID | Species                                                                            | Genomic Data Columns |     |     |     |     |     |     |     |     |     |     |     |     |     |     |     |     |     |     |     |     |     |     |     |     |     |     |       |       |       |       |     |     |       |       |       |       |
|----|------------------------------------------------------------------------------------|----------------------|-----|-----|-----|-----|-----|-----|-----|-----|-----|-----|-----|-----|-----|-----|-----|-----|-----|-----|-----|-----|-----|-----|-----|-----|-----|-----|-------|-------|-------|-------|-----|-----|-------|-------|-------|-------|
|    |                                                                                    | 1                    | 2   | 3   | 4   | 5   | 6   | 7   | 8   | 9   | 10  | 11  | 12  | 13  | 14  | 15  | 16  | 17  | 18  | 19  | 20  | 21  |     |     |     |     |     |     |       |       |       |       |     |     |       |       |       |       |
| 1  | "Aerobacter diversum" (sic) Burkey 1928                                            | 102/152              | 4/4 | 3/3 | 4/4 | 2/2 | 5/5 | 6/6 | 1/1 | 3/3 | 4/4 | 1/1 | 5/5 | 5/5 | 2/2 | 4/4 | 1/1 | 3/3 | 2/2 | 5/5 | 7/7 | 9/9 | 1/1 | 8/8 | 1/1 | 0/0 | 0/0 | 0/0 | 30/32 | 18/22 | 18/22 | 15/22 | 0/0 | 0/0 | 36/38 | 19/22 | 18/22 | 13/30 |
| 1  | Citrobacter (diversus) koseni ATCC BAA-895                                         | 102/152              | 4/4 | 3/3 | 4/4 | 2/2 | 5/5 | 6/6 | 1/1 | 3/3 | 4/4 | 1/1 | 5/5 | 5/5 | 2/2 | 4/4 | 1/1 | 3/3 | 2/2 | 5/5 | 7/7 | 9/9 | 1/1 | 8/8 | 1/1 | 0/0 | 0/0 | 0/0 | 30/32 | 18/22 | 18/22 | 15/22 | 0/0 | 0/0 | 36/38 | 19/22 | 18/22 | 13/30 |
| 1  | ATCC 51116                                                                         | 102/152              | 4/4 | 3/3 | 4/4 | 2/2 | 5/5 | 6/6 | 1/1 | 3/3 | 4/4 | 1/1 | 5/5 | 5/5 | 2/2 | 4/4 | 1/1 | 3/3 | 2/2 | 5/5 | 7/7 | 9/9 | 1/1 | 8/8 | 1/1 | 0/0 | 0/0 | 0/0 | 30/32 | 18/22 | 22/26 | 18/22 | 0/0 | 0/0 | 36/38 | 22/26 | 22/26 | 13/30 |
| 1  | Citrobacter rodentium ICC168                                                       | 102/152              | 4/4 | 3/3 | 4/4 | 2/2 | 5/5 | 6/6 | 1/1 | 3/3 | 4/4 | 1/1 | 5/5 | 5/5 | 2/2 | 4/4 | 1/1 | 3/3 | 2/2 | 5/5 | 7/7 | 9/9 | 1/1 | 8/8 | 1/1 | 0/0 | 0/0 | 0/0 | 30/32 | 18/22 | 18/22 | 15/22 | 0/0 | 0/0 | 36/38 | 19/22 | 18/22 | 13/30 |
| 10 | "Aerobacter" Hormaeche and Edwards 1958                                            | 102/152              | 4/4 | 3/3 | 4/4 | 2/2 | 5/5 | 6/6 | 1/1 | 3/3 | 4/4 | 1/1 | 5/5 | 5/5 | 2/2 | 4/4 | 1/1 | 3/3 | 2/2 | 5/5 | 7/7 | 9/9 | 1/1 | 8/8 | 1/1 | 0/0 | 0/0 | 0/0 | 30/32 | 18/22 | 18/22 | 15/22 | 0/0 | 0/0 | 36/38 | 19/22 | 18/22 | 13/30 |
| 1  | "Aerobacter aerogenes" Hormaeche and Edwards 1958                                  | 102/152              | 4/4 | 3/3 | 4/4 | 2/2 | 5/5 | 6/6 | 1/1 | 3/3 | 4/4 | 1/1 | 5/5 | 5/5 | 2/2 | 4/4 | 1/1 | 3/3 | 2/2 | 5/5 | 7/7 | 9/9 | 1/1 | 8/8 | 1/1 | 0/0 | 0/0 | 0/0 | 30/32 | 18/22 | 18/22 | 15/22 | 0/0 | 0/0 | 36/38 | 19/22 | 18/22 | 13/30 |
| 1  | Enterobacter aerogenes EA1290E                                                     | 102/152              | 4/4 | 3/3 | 4/4 | 2/2 | 5/5 | 6/6 | 1/1 | 3/3 | 4/4 | 1/1 | 5/5 | 5/5 | 2/2 | 4/4 | 1/1 | 3/3 | 2/2 | 5/5 | 7/7 | 9/9 | 1/1 | 8/8 | 1/1 | 0/0 | 0/0 | 0/0 | 30/32 | 18/22 | 18/22 | 15/22 | 0/0 | 0/0 | 36/38 | 19/22 | 18/22 | 13/30 |
| 1  | Enterobacter aerogenes KCT1509                                                     | 102/152              | 4/4 | 3/3 | 4/4 | 2/2 | 5/5 | 6/6 | 1/1 | 3/3 | 4/4 | 1/1 | 5/5 | 5/5 | 2/2 | 4/4 | 1/1 | 3/3 | 2/2 | 5/5 | 7/7 | 9/9 | 1/1 | 8/8 | 1/1 | 0/0 | 0/0 | 0/0 | 30/32 | 18/22 | 18/22 | 15/22 | 0/0 | 0/0 | 36/38 | 19/22 | 18/22 | 13/30 |
| 6  | Enterobacter cloacae complex "Aerobacter cloacae" (Jordan 1890) Bergey et al. 1923 | 102/152              | 4/4 | 3/3 | 4/4 | 2/2 | 5/5 | 6/6 | 1/1 | 3/3 | 4/4 | 1/1 | 5/5 | 5/5 | 2/2 | 4/4 | 1/1 | 3/3 | 2/2 | 5/5 | 7/7 | 9/9 | 1/1 | 8/8 | 1/1 | 0/0 | 0/0 | 0/0 | 30/32 | 18/22 | 18/22 | 15/22 | 0/0 | 0/0 | 36/38 | 19/22 | 18/22 | 13/30 |
| 1  | "Aerobacter dissolvans" (Rosen 1922) Waldee 1945                                   | 102/152              | 4/4 | 3/3 | 4/4 | 2/2 | 5/5 | 6/6 | 1/1 | 3/3 | 4/4 | 1/1 | 5/5 | 5/5 | 2/2 | 4/4 | 1/1 | 3/3 | 2/2 | 5/5 | 7/7 | 9/9 | 1/1 | 8/8 | 1/1 | 0/0 | 0/0 | 0/0 | 30/32 | 18/22 | 18/22 | 15/22 | 0/0 | 0/0 | 36/38 | 19/22 | 18/22 | 13/30 |
| 1  | Enterobacter cloacae subsp. dissolvans SDM                                         | 102/152              | 4/4 | 3/3 | 4/4 | 2/2 | 5/5 | 6/6 | 1/1 | 3/3 | 4/4 | 1/1 | 5/5 | 5/5 | 2/2 | 4/4 | 1/1 | 3/3 | 2/2 | 5/5 | 7/7 | 9/9 | 1/1 | 8/8 | 1/1 | 0/0 | 0/0 | 0/0 | 30/32 | 18/22 | 18/22 | 15/22 | 0/0 | 0/0 | 36/38 | 19/22 | 18/22 | 13/30 |
| 2  | Enterobacter cloacae subsp. cloacae ATCC 13047                                     | 102/152              | 4/4 | 3/3 | 4/4 | 2/2 | 5/5 | 6/6 | 1/1 | 3/3 | 4/4 | 1/1 | 5/5 | 5/5 | 2/2 | 4/4 | 1/1 | 3/3 | 2/2 | 5/5 | 7/7 | 9/9 | 1/1 | 8/8 | 1/1 | 0/0 | 0/0 | 0/0 | 30/32 | 18/22 | 18/22 | 15/22 | 0/0 | 0/0 | 36/38 | 19/22 | 18/22 | 13/30 |
| 1  | Enterobacter cloacae subsp. cloacae ENHKU01                                        | 102/152              | 4/4 | 3/3 | 4/4 | 2/2 | 5/5 | 6/6 | 1/1 | 3/3 | 4/4 | 1/1 | 5/5 | 5/5 | 2/2 | 4/4 | 1/1 | 3/3 | 2/2 | 5/5 | 7/7 | 9/9 | 1/1 | 8/8 | 1/1 | 0/0 | 0/0 | 0/0 | 30/32 | 18/22 | 18/22 | 15/22 | 0/0 | 0/0 | 36/38 | 19/22 | 18/22 | 13/30 |
| 1  | Enterobacter cloacae EcWSU1                                                        | 102/152              | 4/4 | 3/3 | 4/4 | 2/2 | 5/5 | 6/6 | 1/1 | 3/3 | 4/4 | 1/1 | 5/5 | 5/5 | 2/2 | 4/4 | 1/1 | 3/3 | 2/2 | 5/5 | 7/7 | 9/9 | 1/1 | 8/8 | 1/1 | 0/0 | 0/0 | 0/0 | 30/32 | 18/22 | 18/22 | 15/22 | 0/0 | 0/0 | 36/38 | 19/22 | 18/22 | 13/30 |
| 1  | ATCC 35953                                                                         | 102/152              | 4/4 | 3/3 | 4/4 | 2/2 | 5/5 | 6/6 | 1/1 | 3/3 | 4/4 | 1/1 | 5/5 | 5/5 | 2/2 | 4/4 | 1/1 | 3/3 | 2/2 | 5/5 | 7/7 | 9/9 | 1/1 | 8/8 | 1/1 | 0/0 | 0/0 | 0/0 | 30/32 | 18/22 | 18/22 | 15/22 | 0/0 | 0/0 | 36/38 | 19/22 | 18/22 | 13/30 |
| 1  | Enterobacter agriosus LF7a "Enterobacter ligniolifolius" Deangelis et al. 2011     | 102/152              | 4/4 | 3/3 | 4/4 | 2/2 | 5/5 | 6/6 | 1/1 | 3/3 | 4/4 | 1/1 | 5/5 | 5/5 | 2/2 | 4/4 | 1/1 | 3/3 | 2/2 | 5/5 | 7/7 | 9/9 | 1/1 | 8/8 | 1/1 | 0/0 | 0/0 | 0/0 | 30/32 | 18/22 | 18/22 | 15/22 | 0/0 | 0/0 | 36/38 | 19/22 | 18/22 | 13/30 |
| 1  | Enterobacter cloacae SCF1                                                          | 102/152              | 4/4 | 3/3 | 4/4 | 2/2 | 5/5 | 6/6 | 1/1 | 3/3 | 4/4 | 1/1 | 5/5 | 5/5 | 2/2 | 4/4 | 1/1 | 3/3 | 2/2 | 5/5 | 7/7 | 9/9 | 1/1 | 8/8 | 1/1 | 0/0 | 0/0 | 0/0 | 30/32 | 18/22 | 18/22 | 15/22 | 0/0 | 0/0 | 36/38 | 19/22 | 18/22 | 13/30 |
| 1  | Enterobacter sp. E38                                                               | 102/152              | 4/4 | 3/3 | 4/4 | 2/2 | 5/5 | 6/6 | 1/1 | 3/3 | 4/4 | 1/1 | 5/5 | 5/5 | 2/2 | 4/4 | 1/1 | 3/3 | 2/2 | 5/5 | 7/7 | 9/9 | 1/1 | 8/8 | 1/1 | 0/0 | 0/0 | 0/0 | 30/32 | 18/22 | 18/22 | 15/22 | 0/0 | 0/0 | 36/38 | 19/22 | 18/22 | 13/30 |
| 1  | Enterobacter sp. RA-368                                                            | 102/152              | 4/4 | 3/3 | 4/4 | 2/2 | 5/5 | 6/6 | 1/1 | 3/3 | 4/4 | 1/1 | 5/5 | 5/5 | 2/2 | 4/4 | 1/1 | 3/3 | 2/2 | 5/5 | 7/7 | 9/9 | 1/1 | 8/8 | 1/1 | 0/0 | 0/0 | 0/0 | 30/32 | 18/22 | 18/22 | 15/22 | 0/0 | 0/0 | 36/38 | 19/22 | 18/22 | 13/30 |
| 7  | Erwinia "Baicillus amylovorus" (Burrill 1882) Trevisan 1899                        | 102/152              | 4/4 | 3/3 | 4/4 | 2/2 | 5/5 | 6/6 | 1/1 | 3/3 | 4/4 | 1/1 | 5/5 | 5/5 | 2/2 | 4/4 | 1/1 | 3/3 | 2/2 | 5/5 | 7/7 | 9/9 | 1/1 | 8/8 | 1/1 | 0/0 | 0/0 | 0/0 | 30/32 | 18/22 | 18/22 | 15/22 | 0/0 | 0/0 | 36/38 | 19/22 | 18/22 | 13/30 |
| 2  | Erwinia amylovora CFBP1430                                                         | 102/152              | 4/4 | 3/3 | 4/4 | 2/2 | 5/5 | 6/6 | 1/1 | 3/3 | 4/4 | 1/1 | 5/5 | 5/5 | 2/2 | 4/4 | 1/1 | 3/3 | 2/2 | 5/5 | 7/7 | 9/9 | 1/1 | 8/8 | 1/1 | 0/0 | 0/0 | 0/0 | 30/32 | 18/22 | 18/22 | 15/22 | 0/0 | 0/0 | 36/38 | 19/22 | 18/22 | 13/30 |
| 1  | Erwinia amylovora 27-3                                                             | 102/152              | 4/4 | 3/3 | 4/4 | 2/2 | 5/5 | 6/6 | 1/1 | 3/3 | 4/4 | 1/1 | 5/5 | 5/5 | 2/2 | 4/4 | 1/1 | 3/3 | 2/2 | 5/5 | 7/7 | 9/9 | 1/1 | 8/8 | 1/1 | 0/0 | 0/0 | 0/0 | 30/32 | 18/22 | 18/22 | 15/22 | 0/0 | 0/0 | 36/38 | 19/22 | 18/22 | 13/30 |
| 2  | CFBP 4172                                                                          | 102/152              | 4/4 | 3/3 | 4/4 | 2/2 | 5/5 | 6/6 | 1/1 | 3/3 | 4/4 | 1/1 | 5/5 | 5/5 | 2/2 | 4/4 | 1/1 | 3/3 | 2/2 | 5/5 | 7/7 | 9/9 | 1/1 | 8/8 | 1/1 | 0/0 | 0/0 | 0/0 | 30/32 | 18/22 | 18/22 | 15/22 | 0/0 | 0/0 | 36/38 | 19/22 | 18/22 | 13/30 |
| 1  | Erwinia pyrifoliae 16/96                                                           | 102/152              | 4/4 | 3/3 | 4/4 | 2/2 | 5/5 | 6/6 | 1/1 | 3/3 | 4/4 | 1/1 | 5/5 | 5/5 | 2/2 | 4/4 | 1/1 | 3/3 | 2/2 | 5/5 | 7/7 | 9/9 | 1/1 | 8/8 | 1/1 | 0/0 | 0/0 | 0/0 | 30/32 | 18/22 | 18/22 | 15/22 | 0/0 | 0/0 | 36/38 | 19/22 | 18/22 | 13/30 |
| 1  | CIP 106121                                                                         | 102/152              | 4/4 | 3/3 | 4/4 | 2/2 | 5/5 | 6/6 | 1/1 | 3/3 | 4/4 | 1/1 | 5/5 | 5/5 | 2/2 | 4/4 | 1/1 | 3/3 | 2/2 | 5/5 | 7/7 | 9/9 | 1/1 | 8/8 | 1/1 | 0/0 | 0/0 | 0/0 | 30/32 | 18/22 | 18/22 | 15/22 | 0/0 | 0/0 | 36/38 | 19/22 | 18/22 | 13/30 |
| 1  | Erwinia biilingiae 661                                                             | 102/152              | 4/4 | 3/3 | 4/4 | 2/2 | 5/5 | 6/6 | 1/1 | 3/3 | 4/4 | 1/1 | 5/5 | 5/5 | 2/2 | 4/4 | 1/1 | 3/3 | 2/2 | 5/5 | 7/7 | 9/9 | 1/1 | 8/8 | 1/1 | 0/0 | 0/0 | 0/0 | 30/32 | 18/22 | 18/22 | 15/22 | 0/0 | 0/0 | 36/38 | 19/22 | 18/22 | 13/30 |
| 1  | Erwinia sp. Ejp617                                                                 | 102/152              | 4/4 | 3/3 | 4/4 | 2/2 | 5/5 | 6/6 | 1/1 | 3/3 | 4/4 | 1/1 | 5/5 | 5/5 | 2/2 | 4/4 | 1/1 | 3/3 | 2/2 | 5/5 | 7/7 | 9/9 | 1/1 | 8/8 | 1/1 | 0/0 | 0/0 | 0/0 | 30/32 | 18/22 | 18/22 | 15/22 | 0/0 | 0/0 | 36/38 | 19/22 | 18/22 | 13/30 |
| 1  | DSM 17950                                                                          | 102/152              | 4/4 | 3/3 | 4/4 | 2/2 | 5/5 | 6/6 | 1/1 | 3/3 | 4/4 | 1/1 | 5/5 | 5/5 | 2/2 | 4/4 | 1/1 | 3/3 | 2/2 | 5/5 | 7/7 | 9/9 | 1/1 | 8/8 | 1/1 | 0/0 | 0/0 | 0/0 | 30/32 | 18/22 | 18/22 | 15/22 | 0/0 | 0/0 | 36/38 | 19/22 | 18/22 | 13/30 |
| 58 | Escherichia "Baicillus amylovorus" (Burrill 1882) Trevisan 1899                    | 102/152              | 4/4 | 3/3 | 4/4 | 2/2 | 5/5 | 6/6 | 1/1 | 3/3 | 4/4 | 1/1 | 5/5 | 5/5 | 2/2 | 4/4 | 1/1 | 3/3 | 2/2 | 5/5 | 7/7 | 9/9 | 1/1 | 8/8 | 1/1 | 0/0 | 0/0 | 0/0 | 30/32 | 18/22 | 18/22 | 15/22 | 0/0 | 0/0 | 36/38 | 19/22 | 18/22 | 13/30 |
| 57 | "Escherichia coli" Migula 1895                                                     | 102/152              | 4/4 | 3/3 | 4/4 | 2/2 | 5/5 | 6/6 | 1/1 | 3/3 | 4/4 | 1/1 | 5/5 | 5/5 | 2/2 | 4/4 | 1/1 | 3/3 | 2/2 | 5/5 | 7/7 | 9/9 | 1/1 | 8/8 | 1/1 | 0/0 | 0/0 | 0/0 | 30/32 | 18/22 | 18/22 | 15/22 | 0/0 | 0/0 | 36/38 | 19/22 | 18/22 | 13/30 |
| 1  | "Escherichia coli" (strain B)                                                      | 102/152              | 4/4 | 3/3 | 4/4 | 2/2 | 5/5 | 6/6 | 1/1 | 3/3 | 4/4 | 1/1 | 5/5 | 5/5 | 2/2 | 4/4 | 1/1 | 3/3 | 2/2 | 5/5 | 7/7 | 9/9 | 1/1 | 8/8 | 1/1 | 0/0 | 0/0 | 0/0 | 30/32 | 18/22 | 18/22 | 15/22 | 0/0 | 0/0 | 36/38 | 19/22 | 18/22 | 13/30 |
| 1  | Escherichia coli B (REL606 strain)                                                 | 102/152              | 4/4 | 3/3 | 4/4 | 2/2 | 5/5 | 6/6 | 1/1 | 3/3 | 4/4 | 1/1 | 5/5 | 5/5 | 2/2 | 4/4 | 1/1 | 3/3 | 2/2 | 5/5 | 7/7 | 9/9 | 1/1 | 8/8 | 1/1 | 0/0 | 0/0 | 0/0 | 30/32 | 18/22 | 18/22 | 15/22 | 0/0 | 0/0 | 36/38 | 19/22 | 18/22 | 13/30 |
| 5  | Escherichia coli K-12                                                              | 102/152              | 4/4 | 3/3 | 4/4 | 2/2 | 5/5 | 6/6 | 1/1 | 3/3 | 4/4 | 1/1 | 5/5 | 5/5 | 2/2 | 4/4 | 1/1 | 3/3 | 2/2 | 5/5 | 7/7 | 9/9 | 1/1 | 8/8 | 1/1 | 0/0 | 0/0 | 0/0 | 30/32 | 18/22 | 18/22 | 15/22 | 0/0 | 0/0 | 36/38 | 19/22 | 18/22 | 13/30 |
| 1  | Escherichia coli DH10B                                                             | 102/152              | 4/4 | 3/3 | 4/4 | 2/2 | 5/5 | 6/6 | 1/1 | 3/3 | 4/4 | 1/1 | 5/5 | 5/5 | 2/2 | 4/4 | 1/1 | 3/3 | 2/2 | 5/5 | 7/7 | 9/9 | 1/1 | 8/8 | 1/1 | 0/0 | 0/0 | 0/0 | 30/32 | 18/22 | 18/22 | 15/22 | 0/0 | 0/0 | 36/38 | 19/22 | 18/22 | 13/30 |
| 1  | Escherichia coli W3110                                                             | 102/152              | 4/4 | 3/3 | 4/4 | 2/2 | 5/5 | 6/6 | 1/1 | 3/3 | 4/4 | 1/1 | 5/5 | 5/5 | 2/2 | 4/4 | 1/1 | 3/3 | 2/2 | 5/5 | 7/7 | 9/9 | 1/1 |     |     |     |     |     |       |       |       |       |     |     |       |       |       |       |



|    |                                                                       |                   |           |                 |                 |                 |                 |               |                   |                 |                   |             |         |         |         |         |         |         |        |      |
|----|-----------------------------------------------------------------------|-------------------|-----------|-----------------|-----------------|-----------------|-----------------|---------------|-------------------|-----------------|-------------------|-------------|---------|---------|---------|---------|---------|---------|--------|------|
| 1  | Salmonella enterica subsp. enterica serovar Dublin CT_02021853        | 81/82 3/3 3/3     | 3/3 3/3   | 6/8 6/8 1/1     | 3/3 5/5         | 1/1 4/8 4/4     | 2/2 4/4         | 1/1 3/3 2/2   | 4/4 9/9           | 4/4 1/1 8/8     | 1/1 0/0           | 0/0         | 0/0     | 38/82   | 18/82   | 13/82   | 12/82   | 1/82    |        |      |
|    | Salmonella enterica serovar Newport                                   | 84/85 3/3 3/3     | 4/4 2/2   | 8/6 6/6 1/1     | 3/3 4/4         | 1/1 5/5 6/6     | 2/2 4/4         | 1/1 3/3 2/2   | 4/4 9/9           | 5/5 1/1 8/8     | 1/1 0/0           | 0/0         | 0/0     | 36/85   | 19/85   | 18/85   | 13/85   | 1/85    |        |      |
|    | Salmonella enterica subsp. enterica serovar Newport SL254             | 84/85 3/3 3/3     | 4/4 2/2   | 8/6 6/6 1/1     | 3/3 4/4         | 1/1 5/5 6/6     | 2/2 4/4         | 1/1 3/3 2/2   | 4/4 9/9           | 5/5 1/1 8/8     | 1/1 0/0           | 0/0         | 0/0     | 36/85   | 19/85   | 18/85   | 13/85   | 1/85    |        |      |
| 1  | "Bacillus enteritidis" Gaertner 1888                                  | 83/83 3/3 3/3     | 4/4 3/3   | 8/6 6/6 1/1     | 3/3 5/5         | 1/1 5/5 6/6     | 2/2 4/4         | 1/1 3/3 2/2   | 4/4 8/8           | 4/4 1/1 8/8     | 1/1 0/0           | 0/0         | 0/0     | 52/83   | 31/83   |         |         |         |        |      |
| 1  | Salmonella enterica subsp. enterica serovar Enteritidis str. PT125109 | 83/83 3/3 3/3     | 4/4 3/3   | 8/6 6/6 1/1     | 3/3 5/5         | 1/1 5/5 6/6     | 2/2 4/4         | 1/1 3/3 2/2   | 4/4 8/8           | 4/4 1/1 8/8     | 1/1 0/0           | 0/0         | 0/0     | 52/83   | 31/83   |         |         |         |        |      |
| 1  | Salmonella enterica subsp. enterica serovar Schwarzengrund            | 83/83 3/3 3/3     | 4/4 3/3   | 8/6 6/6 1/1     | 3/3 5/5         | 1/1 5/5 6/6     | 2/2 4/4         | 1/1 3/3 2/2   | 4/4 9/9           | 4/4 1/1 8/8     | 1/1 0/0           | 0/0         | 0/0     | 37/83   | 19/83   | 15/83   | 12/83   |         |        |      |
| 1  | Salmonella enterica subsp. enterica serovar Schwarzengrund CVM19633   | 83/83 3/3 3/3     | 4/4 3/3   | 8/6 6/6 1/1     | 3/3 5/5         | 1/1 5/5 6/6     | 2/2 4/4         | 1/1 3/3 2/2   | 4/4 9/9           | 4/4 1/1 8/8     | 1/1 0/0           | 0/0         | 0/0     | 44/83AB | 22/83AB | 18/83AB | 14/83AB |         |        |      |
| 1  | Salmonella enterica subsp. enterica serovar Javiana                   | 84/84 3/3 3/3     | 4/4 3/3   | 8/6 6/6 1/1     | 3/3 5/5         | 1/1 5/5 5/5     | 2/2 4/4         | 1/1 3/3 2/2   | 4/4 9/9           | 4/4 1/1 8/8     | 1/1 0/0           | 0/0         | 0/0     | 53/84   | 31/84   |         |         |         |        |      |
| 1  | Salmonella enterica subsp. enterica serovar Javiana str. AZ_P11230515 | 84/84 3/3 3/3     | 4/4 3/3   | 8/6 6/6 1/1     | 3/3 5/5         | 1/1 5/5 5/5     | 2/2 4/4         | 1/1 3/3 2/2   | 4/4 9/9           | 4/4 1/1 8/8     | 1/1 0/0           | 0/0         | 0/0     | 53/84   | 31/84   |         |         |         |        |      |
| 1  | Salmonella enterica subsp. enterica serovar 1,4,(5),12:-              | 86/86 3/3 3/3     | 4/4 3/3   | 8/6 6/6 1/1     | 3/3 5/5         | 1/1 5/5 5/5     | 2/2 4/4         | 1/1 3/3 2/2   | 4/4 10/10         | 5/5 1/1 8/8     | 1/1 0/0           | 0/0         | 0/0     | 54/86   | 32/86   |         |         |         |        |      |
| 1  | Salmonella enterica subsp. enterica serovar 1,4,(5),12:- str. 08-1736 | 86/86 3/3 3/3     | 4/4 3/3   | 8/6 6/6 1/1     | 3/3 5/5         | 1/1 5/5 5/5     | 2/2 4/4         | 1/1 3/3 2/2   | 4/4 10/10         | 5/5 1/1 8/8     | 1/1 0/0           | 0/0         | 0/0     | 54/86   | 32/86   |         |         |         |        |      |
| 1  | ATCC 43975                                                            | 83/83 3/3 3/3     | 4/4 3/3   | 8/6 6/6 1/1     | 3/3 5/5         | 1/1 5/5 6/6     | 2/2 4/4         | 1/1 3/3 2/2   | 4/4 9/9           | 4/4 1/1 8/8     | 1/1 0/0           | 0/0         | 0/0     | 52/83   | 31/83   |         |         |         |        |      |
| 1  | Salmonella bongori 12149                                              | 83/83 3/3 3/3     | 4/4 3/3   | 8/6 6/6 1/1     | 3/3 5/5         | 1/1 5/5 6/6     | 2/2 4/4         | 1/1 3/3 2/2   | 4/4 9/9           | 4/4 1/1 8/8     | 1/1 0/0           | 0/0         | 0/0     | 52/83   | 31/83   |         |         |         |        |      |
| 10 | Serratia                                                              | 77/78 4/4 3/3     | 4/4 2/2   | 5/6 5/6 1/1     | 2/2 4/4         | 1/1 6/6 8/8     | 2/2 3/3         | 1/1 3/3 2/2   | 2/2 6/6           | 4/5 1/1 8/8     | 1/1 0/0           | 0/0         | 0/0     | 45/77AB | 37/77AB | 16/77AB | 14/77AB | 11/77AB | 7/77AB |      |
| 1  | "Aerobacter liquefaciens" Grimes and Hennerty 1931                    | 77/78 4/4 3/3     | 4/4 2/2   | 5/6 5/6 1/1     | 2/2 4/4         | 1/1 6/6 8/8     | 2/2 3/3         | 1/1 3/3 2/2   | 2/2 6/6           | 4/5 1/1 8/8     | 1/1 0/0           | 0/0         | 0/0     | 48/78   | 29/78   | 1/78    |         |         |        |      |
| 1  | Serratia liquefaciens ATCC 27592                                      | 77/78 4/4 3/3     | 4/4 2/2   | 5/6 5/6 1/1     | 2/2 4/4         | 1/1 6/6 8/8     | 2/2 3/3         | 1/1 3/3 2/2   | 2/2 6/6           | 4/5 1/1 8/8     | 1/1 0/0           | 0/0         | 0/0     | 48/78   | 29/78   | 1/78    |         |         |        |      |
| 2  | "Bacillus marcescens" (Bizio 1823)                                    | 162/162           | 8/8 6/6   | 8/8 6/6 1/1     | 12/12 12/12 2/2 | 9/6 10/10       | 2/2 9/9 8/8     | 4/4 6/6       | 2/2 6/6 4/4       | 10/10 12/12     | 9/8 2/2 1/8 1/8   | 2/2 0/0     | 0/0     | 103/162 | 59/162  |         |         |         |        |      |
| 1  | Travisian in de Toni and Travisian 1899                               | 80/80 4/4 3/3     | 4/4 3/3   | 8/6 6/6 1/1     | 3/3 5/5         | 1/1 5/5 6/6     | 2/2 3/3         | 1/1 3/3 2/2   | 5/5 6/6           | 4/4 1/1 8/8     | 1/1 0/0           | 0/0         | 50/80   | 30/80   |         |         |         |         |        |      |
| 1  | Serratia marcescens WW4                                               | 80/80 4/4 3/3     | 4/4 3/3   | 8/6 6/6 1/1     | 3/3 5/5         | 1/1 5/5 6/6     | 2/2 3/3         | 1/1 3/3 2/2   | 5/5 6/6           | 4/4 1/1 8/8     | 1/1 0/0           | 0/0         | 50/80   | 30/80   |         |         |         |         |        |      |
| 1  | Serratia marcescens FG194                                             | 80/80 4/4 3/3     | 4/4 3/3   | 8/6 6/6 1/1     | 3/3 5/5         | 1/1 5/5 6/6     | 2/2 3/3         | 1/1 3/3 2/2   | 5/5 6/6           | 4/4 1/1 8/8     | 1/1 0/0           | 0/0         | 50/80   | 30/80   |         |         |         |         |        |      |
| 1  | "Erwinia proteromaculans" (Paine and Stanfield 1919) Dyae 1966        | 83/83 4/4 3/3     | 4/4 3/3   | 8/6 6/6 1/1     | 3/3 5/5         | 1/1 6/6 5/5     | 2/2 3/3         | 1/1 3/3 2/2   | 4/4 6/6           | 4/4 1/1 8/8     | 1/1 0/0           | 0/0         | 36/83   | 17/83   | 16/83   | 14/83   |         |         |        |      |
| 1  | Serratia proteromaculans 568                                          | 83/83 4/4 3/3     | 4/4 3/3   | 8/6 6/6 1/1     | 3/3 5/5         | 1/1 6/6 5/5     | 2/2 3/3         | 1/1 3/3 2/2   | 4/4 6/6           | 4/4 1/1 8/8     | 1/1 0/0           | 0/0         | 36/83   | 17/83   | 16/83   | 14/83   |         |         |        |      |
| 1  | "Bacterium plymuthicum" (sic) Lehmann and Neumann 1896                | 10/10 9/9         | 12/12 9/9 | 18/18 21/21 3/3 | 6/8 15/15       | 3/3 18/18 18/18 | 8/8 8/8         | 3/3 9/9 6/6   | 12/12 18/18       | 12/12 3/3 24/24 | 3/3 0/0           | 0/0         | 0/0     | 43/148  | 20/148  | 19/148  | 16/148  |         |        |      |
| 1  | Serratia odorifera 4Rx13                                              | 50/50 4/4 3/3     | 4/4 3/3   | 8/6 6/6 1/1     | 3/3 5/5         | 1/1 5/5 6/6     | 2/2 4/4         | 1/1 3/3 2/2   | 4/4 8/8           | 4/4 1/1 8/8     | 1/1 0/0           | 0/0         | 51/80   | 27/80   |         |         |         |         |        |      |
| 1  | Serratia plymuthica AS9                                               | 84/84 4/4 3/3     | 4/4 3/3   | 8/6 6/6 1/1     | 3/3 5/5         | 1/1 5/5 6/6     | 2/2 3/3         | 1/1 3/3 2/2   | 4/4 6/6           | 4/4 1/1 8/8     | 1/1 0/0           | 0/0         | 53/84   | 31/84   |         |         |         |         |        |      |
| 1  | Serratia plymuthica S13                                               | 84/84 4/4 3/3     | 4/4 3/3   | 8/6 6/6 1/1     | 3/3 5/5         | 1/1 5/5 6/6     | 2/2 3/3         | 1/1 3/3 2/2   | 4/4 6/6           | 4/4 1/1 8/8     | 1/1 0/0           | 0/0         | 53/84   | 31/84   |         |         |         |         |        |      |
| 1  | "Candidatus Serratia symbiotica" Moran et al. 2005                    | 10/10 2/2 0/1     | 1/1 1/1   | 2/2 0/0 0/0     | 100.00 100.00   | 100.00 100.00   | 66.70 100.00    | 0/0 0/0 0/0   | 0/0 0/0 0/0       | 0/0 0/0 0/0     | 0/0 0/0 0/0       | 0/0 0/0 0/0 | 12/35   | 10/35   | 7/35    | 6/35    |         |         |        |      |
| 1  | Candidatus Serratia symbiotica Cinar cedri                            | 18/18 2/2 0/1     | 1/1 1/1   | 2/2 0/0 0/0     | 100.00 100.00   | 100.00 100.00   | 66.70 100.00    | 0/0 0/0 0/0   | 0/0 0/0 0/0       | 0/0 0/0 0/0     | 0/0 0/0 0/0       | 0/0 0/0 0/0 | 34/34AB | 28/86   | 20/86   | 17/86   |         |         |        |      |
| 1  | Serratia sp. AS12                                                     | 84/84 4/4 3/3     | 4/4 3/3   | 8/6 6/6 1/1     | 3/3 5/5         | 1/1 5/5 6/6     | 2/2 3/3         | 1/1 3/3 2/2   | 4/4 6/6           | 4/4 1/1 8/8     | 1/1 0/0           | 0/0         | 53/84   | 31/84   |         |         |         |         |        |      |
| 1  | Serratia sp. AS13                                                     | 84/84 4/4 3/3     | 4/4 3/3   | 8/6 6/6 1/1     | 3/3 5/5         | 1/1 5/5 6/6     | 2/2 3/3         | 1/1 3/3 2/2   | 4/4 6/6           | 4/4 1/1 8/8     | 1/1 0/0           | 0/0         | 53/84   | 31/84   |         |         |         |         |        |      |
| 9  | Shigella                                                              | 86/86 3/3 3/3     | 3/3 3/3   | 3/3 3/3         | 3/3 3/3         | 3/3 3/3         | 3/3 3/3         | 3/3 3/3       | 3/3 3/3           | 3/3 3/3         | 3/3 3/3           | 3/3 3/3     | 3/3 3/3 | 51/86   | 25/86   | 23/86   | 19/86   | 2/86    | 2/86   | 1/86 |
| 2  | ATCC 8700                                                             | 86/86 3/3 3/3     | 3/3 3/3   | 3/3 3/3         | 3/3 3/3         | 3/3 3/3         | 3/3 3/3         | 3/3 3/3       | 3/3 3/3           | 3/3 3/3         | 3/3 3/3           | 3/3 3/3     | 3/3 3/3 | 51/86   | 25/86   | 23/86   | 19/86   | 2/86    | 2/86   | 1/86 |
| 1  | Shigella boydii BS227                                                 | 80/80 4/4 3/3     | 4/4 3/3   | 8/6 6/6 1/1     | 3/3 5/5         | 1/1 5/5 6/6     | 2/2 4/4         | 1/1 3/3 2/2   | 4/4 8/8           | 4/4 1/1 8/8     | 1/1 0/0           | 0/0         | 51/80   | 27/80   |         |         |         |         |        |      |
| 1  | Shigella boydii BS512                                                 | 80/80 4/4 3/3     | 4/4 3/3   | 8/6 6/6 1/1     | 3/3 5/5         | 1/1 5/5 6/6     | 2/2 4/4         | 1/1 3/3 2/2   | 4/4 8/8           | 4/4 1/1 8/8     | 1/1 0/0           | 0/0         | 51/80   | 27/80   |         |         |         |         |        |      |
| 1  | "Bacillus dysenteriae" Shiga 1898                                     | 87/87 3/3 3/3     | 4/4 3/3   | 8/6 6/6 1/1     | 3/3 5/5         | 1/1 5/5 6/6     | 2/2 3/3         | 1/1 3/3 2/2   | 4/4 6/6           | 4/4 1/1 8/8     | 1/1 0/0           | 0/0         | 53/87   | 32/87   | 1/87    |         |         |         |        |      |
| 1  | Shigella dysenteriae Sd197                                            | 87/87 3/3 3/3     | 4/4 3/3   | 8/6 6/6 1/1     | 3/3 5/5         | 1/1 5/5 6/6     | 2/2 3/3         | 1/1 3/3 2/2   | 4/4 6/6           | 4/4 1/1 8/8     | 1/1 0/0           | 0/0         | 53/87   | 32/87   | 1/87    |         |         |         |        |      |
| 4  | "Shigella paradysenteriae" Weditn 1927                                | 10/10 12/12 12/12 | 15/15 9/9 | 40/40 21/21 4/4 | 7/7 15/15       | 3/3 20/20 17/17 | 8/8 18/18       | 4/4 12/12 8/8 | 30/30 43/43 21/21 | 30/30 31/31     | 4/4 0/0           | 0/0         | 0/0     | 242/388 | 142/388 | 1/388   | 1/388   |         |        |      |
| 2  | Shigella flexneri 2a                                                  | 160/160           | 6/6 6/6   | 7/7 5/5         | 22/22 10/10 2/2 | 3/3 9/9         | 12/12 10/10 8/8 | 4/4 8/8       | 2/2 6/6 4/4       | 14/14 22/22     | 10/10 14/14 15/15 | 2/2 0/0     | 0/0     | 120/161 | 68/161  | 2/161   | 1/161   |         |        |      |
| 1  | Shigella flexneri 2a str. 301                                         | 82/82 3/3 3/3     | 4/4 3/3   | 8/6 6/6 1/1     | 3/3 5/5         | 1/1 5/5 6/6     | 2/2 4/4         | 1/1 3/3 2/2   | 4/4 8/8           | 4/4 1/1 8/8     | 1/1 0/0           | 0/0         | 57/82   | 34/82   | 1/82    | 1/82    |         |         |        |      |
| 1  | Shigella flexneri 2a str. 2457T                                       | 82/82 3/3 3/3     | 4/4 3/3   | 8/6 6/6 1/1     | 3/3 5/5         | 1/1 5/5 6/6     | 2/2 4/4         | 1/1 3/3 2/2   | 4/4 8/8           | 4/4 1/1 8/8     | 1/1 0/0           | 0/0         | 57/82   | 34/82   | 1/82    | 1/82    |         |         |        |      |
| 1  | Shigella flexneri 5                                                   | 86/86 3/3 3/3     | 4/4 3/3   | 8/6 6/6 1/1     | 3/3 5/5         | 1/1 5/5 6/6     | 2/2 4/4         | 1/1 3/3 2/2   | 4/4 8/8           | 4/4 1/1 8/8     | 1/1 0/0           | 0/0         | 57/86   | 38/86   | 1/86    |         |         |         |        |      |
| 1  | Shigella flexneri 5 str. 8401                                         | 86/86 3/3 3/3     | 4/4 3/3   | 8/6 6/6 1/1     | 3/3 5/5         | 1/1 5/5 6/6     | 2/2 4/4         | 1/1 3/3 2/2   | 4/4 8/8           | 4/4 1/1 8/8     | 1/1 0/0           | 0/0         | 57/86   | 38/86   | 1/86    |         |         |         |        |      |
| 1  | Shigella flexneri 2002017                                             | 101/101           | 3/3 3/3   | 4/4 3/3         | 12/12 6/6 1/1   | 2/2 5/5         | 1/1 5/5 5/5     | 2/2 4/4       | 1/1 3/3 2/2       | 8/8 10/10       | 4/4 8/8 8/8       | 1/1 0/0     | 0/0     | 65/101  | 39/101  |         |         |         |        |      |
| 1  | "Bacterium sonnei" Levinse 1920                                       | 101/101           | 8/8 6/6   | 8/8 5/5         | 14/14 12/12 2/2 | 4/4 9/9         | 2/2 10/10 10/10 | 4/4 8/8       | 2/2 6/6 4/4       | 12/12 23/23     | 9/9 12/13 18/18   | 2/2 0/0     | 0/0     | 121/191 | 68/191  | 1/191   | 1/191   |         |        |      |
| 1  | Shigella sonnei 53G                                                   | 111/111           | 2/2 5/5   | 3/3 3/3         | 11/11 8/8 1/1   | 1/1 4/4         | 3/3 5/5 8/8     | 2/2 4/4       | 1/1 3/3 2/2       | 7/7 11/11       | 6/6 7/7 7/7       | 0/0 0/0     | 0/0     | 63/111  | 34/111  | 1/111   | 1/111   |         |        |      |
| 1  | Shigella sonnei Ss046                                                 | 161/161           | 4/4 2/2   | 7/7 6/6 1/1     | 2/2 4/4         | 1/1 5/5 5/5     | 2/2 4/4         | 1/1 3/3 2/2   | 6/6 12/12         | 5/5 6/6 10/10   | 1/1 0/0           | 0/0         | 102/161 | 36/161  | 1/161   |         |         |         |        |      |
| 2  | Xenorhabdus                                                           | 10/10 9/9         | 8/8 7/7   | 10/10 12/12 2/2 | 4/4 11/11       | 2/2 10/10 11/11 | 10/10 8/8       | 2/2 6/6 4/4   | 8/8 13/13 7/7     | 2/2 14/14       | 0/0 0/0 0/0       | 0/0 0/0 0/0 | 102/161 | 59/161  |         |         |         |         |        |      |
| 1  | "Xenorhabdus nematophilus" Poinar and Thomas 1965                     | 79/79 4/4 3/3     | 4/4 3/3   | 8/6 6/6 1/1     | 3/3 5/5         | 1/1 5/5 6/6     | 2/2 3/3         | 1/1 3/3 2/2   | 4/4 7/7           | 4/4 1/1 7/7     | 1/1 0/0           | 0/0         | 51/79   | 28/79   |         |         |         |         |        |      |
| 1  | Xenorhabdus nematophila ATCC 19061                                    | 79/79 4/4 3/3     | 4/4 3/3   | 8/6 6/6 1/1     | 3/3 5/5         | 1/1 5/5 6/6     | 2/2 3/3         | 1/1 3/3 2/2   |                   |                 |                   |             |         |         |         |         |         |         |        |      |

| Accession | Species                                             | Strain | Genome Size (Mb) | GC Content (%) | Contigs | CPDs   | CDSs  | SRGs   | ORFs  | ORFs (%) | ORFs/Mb | ORFs/Kb | ORFs/10Kb | ORFs/100Kb | ORFs/1M | ORFs/1G   |
|-----------|-----------------------------------------------------|--------|------------------|----------------|---------|--------|-------|--------|-------|----------|---------|---------|-----------|------------|---------|-----------|
| 1         | "Paracolobactrum anguillimortiferum"                | 1900   | 110.2            | 58.8           | 1,141   | 12,132 | 2,877 | 23,537 | 3,330 | 100.0    | 12.32   | 123.2   | 1,232     | 12,320     | 123,200 | 1,232,000 |
| 8         | Hoshina 1962                                        | 180    | 8.8              | 61.6           | 122     | 12     | 144   | 18     | 110   | 100.0    | 12.32   | 123.2   | 1,232     | 12,320     | 123,200 | 1,232,000 |
| 1         | Edwardsiella tarda EIB200                           | 100    | 100.0            | 100.0          | 100.0   | 100.0  | 100.0 | 100.0  | 100.0 | 100.0    | 100.0   | 100.0   | 100.0     | 100.0      | 100.0   | 100.0     |
| 1         | Edwardsiella tarda FL602                            | 95     | 105              | 4.4            | 14.4    | 14.4   | 18    | 18     | 212   | 100.0    | 12.32   | 123.2   | 1,232     | 12,320     | 123,200 | 1,232,000 |
| 1         | ATCC 33202                                          | 93     | 63               | 4/4            | 3/3     | 5/5    | 3/3   | 7/7    | 8/8   | 11/1     | 3/3     | 7/7     | 11/1      | 5/5        | 8/8     | 2/2       |
| 1         | Edwardsiella ictaluri 93-146                        | 100    | 100.0            | 100.0          | 100.0   | 100.0  | 100.0 | 100.0  | 100.0 | 100.0    | 100.0   | 100.0   | 100.0     | 100.0      | 100.0   | 100.0     |
| 1         | CCUG 62929                                          | 100    | 100.0            | 100.0          | 100.0   | 100.0  | 100.0 | 100.0  | 100.0 | 100.0    | 100.0   | 100.0   | 100.0     | 100.0      | 100.0   | 100.0     |
| 1         | Edwardsiella piscicida C07-087                      | 100    | 100.0            | 100.0          | 100.0   | 100.0  | 100.0 | 100.0  | 100.0 | 100.0    | 100.0   | 100.0   | 100.0     | 100.0      | 100.0   | 100.0     |
| 2         | Photobacterium                                      | 99     | 12               | 12             | 12      | 12     | 12    | 12     | 12    | 12       | 12      | 12      | 12        | 12         | 12      | 12        |
| 1         | ATCC 29999                                          | 167    | 77               | 4/4            | 3/3     | 8/8    | 5/5   | 1/1    | 2/2   | 5/5      | 1/1     | 2/2     | 5/5       | 1/1        | 2/2     | 5/5       |
| 1         | CGM 7076                                            | 167    | 77               | 4/4            | 3/3     | 8/8    | 5/5   | 1/1    | 2/2   | 5/5      | 1/1     | 2/2     | 5/5       | 1/1        | 2/2     | 5/5       |
| 1         | Photobacterium luminescens subsp. laumondii TTO1    | 167    | 77               | 4/4            | 3/3     | 8/8    | 5/5   | 1/1    | 2/2   | 5/5      | 1/1     | 2/2     | 5/5       | 1/1        | 2/2     | 5/5       |
| 1         | ATCC 43950                                          | 167    | 77               | 4/4            | 3/3     | 8/8    | 5/5   | 1/1    | 2/2   | 5/5      | 1/1     | 2/2     | 5/5       | 1/1        | 2/2     | 5/5       |
| 13        | Buchnera                                            | 98     | 12               | 12             | 12      | 12     | 12    | 12     | 12    | 12       | 12      | 12      | 12        | 12         | 12      | 12        |
| 13        | Acyrtosiphon pisum symbiont P                       | 98     | 12               | 12             | 12      | 12     | 12    | 12     | 12    | 12       | 12      | 12      | 12        | 12         | 12      | 12        |
| 1         | Buchnera aphidicola (Schizaphis graminum)           | 98     | 12               | 12             | 12      | 12     | 12    | 12     | 12    | 12       | 12      | 12      | 12        | 12         | 12      | 12        |
| 1         | Buchnera aphidicola str. Sg (Schizaphis graminum)   | 98     | 12               | 12             | 12      | 12     | 12    | 12     | 12    | 12       | 12      | 12      | 12        | 12         | 12      | 12        |
| 7         | Acyrtosiphon pisum endosymbiont                     | 98     | 12               | 12             | 12      | 12     | 12    | 12     | 12    | 12       | 12      | 12      | 12        | 12         | 12      | 12        |
| 2         | Buchnera aphidicola str. APS (Acyrtosiphon pisum)   | 98     | 12               | 12             | 12      | 12     | 12    | 12     | 12    | 12       | 12      | 12      | 12        | 12         | 12      | 12        |
| 1         | Buchnera aphidicola str. 5A (Acyrtosiphon pisum)    | 98     | 12               | 12             | 12      | 12     | 12    | 12     | 12    | 12       | 12      | 12      | 12        | 12         | 12      | 12        |
| 1         | Buchnera aphidicola str. Tuc7 (Acyrtosiphon pisum)  | 98     | 12               | 12             | 12      | 12     | 12    | 12     | 12    | 12       | 12      | 12      | 12        | 12         | 12      | 12        |
| 1         | Buchnera aphidicola str. JF98 (Acyrtosiphon pisum)  | 98     | 12               | 12             | 12      | 12     | 12    | 12     | 12    | 12       | 12      | 12      | 12        | 12         | 12      | 12        |
| 1         | Buchnera aphidicola str. JF99 (Acyrtosiphon pisum)  | 98     | 12               | 12             | 12      | 12     | 12    | 12     | 12    | 12       | 12      | 12      | 12        | 12         | 12      | 12        |
| 1         | Buchnera aphidicola str. TLW03 (Acyrtosiphon pisum) | 98     | 12               | 12             | 12      | 12     | 12    | 12     | 12    | 12       | 12      | 12      | 12        | 12         | 12      | 12        |
| 1         | Buchnera aphidicola str. LL01 (Acyrtosiphon pisum)  | 98     | 12               | 12             | 12      | 12     | 12    | 12     | 12    | 12       | 12      | 12      | 12        | 12         | 12      | 12        |
| 1         | Buchnera aphidicola (Uroleuon ambrosiae)            | 98     | 12               | 12             | 12      | 12     | 12    | 12     | 12    | 12       | 12      | 12      | 12        | 12         | 12      | 12        |
| 1         | Buchnera aphidicola str. Ua (Uroleuon ambrosiae)    | 98     | 12               | 12             | 12      | 12     | 12    | 12     | 12    | 12       | 12      | 12      | 12        | 12         | 12      | 12        |
| 1         | Buchnera aphidicola (Baizongia pistaciae)           | 98     | 12               | 12             | 12      | 12     | 12    | 12     | 12    | 12       | 12      | 12      | 12        | 12         | 12      | 12        |
| 1         | Buchnera aphidicola (subsp. Baizongia pistaciae)    | 98     | 12               | 12             | 12      | 12     | 12    | 12     | 12    | 12       | 12      | 12      | 12        | 12         | 12      | 12        |
| 1         | Buchnera aphidicola (Cinara tujiarum)               | 98     | 12               | 12             | 12      | 12     | 12    | 12     | 12    | 12       | 12      | 12      | 12        | 12         | 12      | 12        |
| 1         | Buchnera aphidicola (Cinara cedri)                  | 98     | 12               | 12             | 12      | 12     | 12    | 12     | 12    | 12       | 12      | 12      | 12        | 12         | 12      | 12        |
| 1         | Buchnera aphidicola BCC                             | 98     | 12               | 12             | 12      | 12     | 12    | 12     | 12    | 12       | 12      | 12      | 12        | 12         | 12      | 12        |
| 1         | Buchnera aphidicola (Acyrtosiphon kondoi)           | 98     | 12               | 12             | 12      | 12     | 12    | 12     | 12    | 12       | 12      | 12      | 12        | 12         | 12      | 12        |
| 1         | Buchnera aphidicola str. AK (Acyrtosiphon kondoi)   | 98     | 12               | 12             | 12      | 12     | 12    | 12     | 12    | 12       | 12      | 12      | 12        | 12         | 12      | 12        |
| 3         | Rahnella                                            | 228    | 11               | 11             | 9/9     | 9/9    | 8/8   | 18/18  | 15/15 | 3/3      | 6/6     | 14/14   | 3/3       | 6/6        | 14/14   | 8/8       |
| 2         | ATCC 33071                                          | 182    | 8/8              | 8/8            | 8/8     | 8/8    | 8/8   | 8/8    | 8/8   | 8/8      | 8/8     | 8/8     | 8/8       | 8/8        | 8/8     | 8/8       |
| 1         | Rahnella aquatilis ATCC 33071                       | 182    | 8/8              | 8/8            | 8/8     | 8/8    | 8/8   | 8/8    | 8/8   | 8/8      | 8/8     | 8/8     | 8/8       | 8/8        | 8/8     | 8/8       |
| 1         | Rahnella aquatilis HX2                              | 182    | 8/8              | 8/8            | 8/8     | 8/8    | 8/8   | 8/8    | 8/8   | 8/8      | 8/8     | 8/8     | 8/8       | 8/8        | 8/8     | 8/8       |
| 1         | Rahnella aquatilis Y9602                            | 182    | 8/8              | 8/8            | 8/8     | 8/8    | 8/8   | 8/8    | 8/8   | 8/8      | 8/8     | 8/8     | 8/8       | 8/8        | 8/8     | 8/8       |
| 2         | Wigglesworthia                                      | 468    | 2/2              | 2/2            | 2/2     | 2/2    | 2/2   | 2/2    | 2/2   | 2/2      | 2/2     | 2/2     | 2/2       | 2/2        | 2/2     | 2/2       |
| 2         | Wigglesworthia glossinidia                          | 468    | 2/2              | 2/2            | 2/2     | 2/2    | 2/2   | 2/2    | 2/2   | 2/2      | 2/2     | 2/2     | 2/2       | 2/2        | 2/2     | 2/2       |
| 1         | Glossina morsitans P-endosymbiont                   | 3/3    | 3/3              | 3/3            | 3/3     | 3/3    | 3/3   | 3/3    | 3/3   | 3/3      | 3/3     | 3/3     | 3/3       | 3/3        | 3/3     | 3/3       |
| 1         | Glossina brevipalpis P-endosymbiont                 | 2/2    | 2/2              | 2/2            | 2/2     | 2/2    | 2/2   | 2/2    | 2/2   | 2/2      | 2/2     | 2/2     | 2/2       | 2/2        | 2/2     | 2/2       |
| 6         | Pantoea                                             | 469    | 21/21            | 18/18          | 19/19   | 20/20  | 22/22 | 30/30  | 26/26 | 7/7      | 18/18   | 33/33   | 8/8       | 24/24      | 24/24   | 12/12     |
| 4         | "Bacillus ananas" Serrano 1928                      | 303    | 14/14            | 12/12          | 13/13   | 13/13  | 17/17 | 24/24  | 4/4   | 16/16    | 16/16   | 4/4     | 12/12     | 8/8        | 12/12   | 27/27     |
| 1         | Pantoea ananatis LMG 20103                          | 303    | 14/14            | 12/12          | 13/13   | 13/13  | 17/17 | 24/24  | 4/4   | 16/16    | 16/16   | 4/4     | 12/12     | 8/8        | 12/12   | 27/27     |
| 1         | Pantoea ananatis AJ13355                            | 78     | 78               | 4/4            | 3/3     | 5/5    | 6/6   | 6/6    | 1/1   | 4/4      | 4/4     | 2/2     | 4/4       | 1/1        | 3/3     | 2/2       |
| 1         | Pantoea ananatis PA13                               | 78     | 78               | 4/4            | 3/3     | 5/5    | 6/6   | 6/6    | 1/1   | 4/4      | 4/4     | 2/2     | 4/4       | 1/1        | 3/3     | 2/2       |
| 1         | Pantoea ananatis LMG 5342                           | 78     | 78               | 4/4            | 3/3     | 5/5    | 6/6   | 6/6    | 1/1   | 4/4      | 4/4     | 2/2     | 4/4       | 1/1        | 3/3     | 2/2       |
| 1         | BCC 105                                             | 77     | 77               | 4/4            | 3/3     | 5/5    | 6/6   | 6/6    | 1/1   | 4/4      | 4/4     | 2/2     | 4/4       | 1/1        | 3/3     | 2/2       |
| 1         | Pantoea vagans C9-1                                 | 77     | 77               | 4/4            | 3/3     | 5/5    | 6/6   | 6/6    | 1/1   | 4/4      | 4/4     | 2/2     | 4/4       | 1/1        | 3/3     | 2/2       |
| 1         | Pantoea sp. At-9b                                   | 167    | 77               | 4/4            | 3/3     | 5/5    | 6/6   | 6/6    | 1/1   | 4/4      | 4/4     | 2/2     | 4/4       | 1/1        | 3/3     | 2/2       |
| 1         | Sodalis                                             | 168    | 3/3              | 3/3            | 3/3     | 3/3    | 3/3   | 3/3    | 3/3   | 3/3      | 3/3     | 3/3     | 3/3       | 3/3        | 3/3     | 3/3       |
| 1         | DDM 19629                                           | 168    | 3/3              | 3/3            | 3/3     | 3/3    | 3/3   | 3/3    | 3/3   | 3/3      | 3/3     | 3/3     | 3/3       | 3/3        | 3/3     | 3/3       |
| 1         | Sodalis glossinidius 'morsitans'                    | 168    | 3/3              | 3/3            | 3/3     | 3/3    | 3/3   | 3/3    | 3/3   | 3/3      | 3/3     | 3/3     | 3/3       | 3/3        | 3/3     | 3/3       |
| 5         | Pectobacterium                                      | 181    | 19/19            | 19/19          | 19/19   | 19/19  | 30/30 | 25/25  | 5/5   | 10/10    | 25/25   | 5/5     | 15/15     | 10/10      | 20/20   | 29/29     |
| 2         | "Bacillus carotovorus" Jones 1901                   | 153    | 7/7              | 6/6            | 8/8     | 6/6    | 12/12 | 10/10  | 2/2   | 4/4      | 10/10   | 2/2     | 11/11     | 8/8        | 4/4     | 6/6       |
| 2         | Erwinia carotovora carotovora                       | 153    | 7/7              | 6/6            | 8/8     | 6/6    | 12/12 | 10/10  | 2/2   | 4/4      | 10/10   | 2/2     | 11/11     | 8/8        | 4/4     | 6/6       |
| 1         | Pectobacterium carotovorum subsp. carotovorum PC1   | 153    | 7/7              | 6/6            | 8/8     | 6/6    | 12/12 | 10/10  | 2/2   | 4/4      | 10/10   | 2/2     | 11/11     | 8/8        | 4/4     | 6/6       |
| 1         | Pectobacterium carotovorum subsp. carotovorum PC21  | 153    | 7/7              | 6/6            | 8/8     | 6/6    | 12/12 | 10/10  | 2/2   | 4/4      | 10/10   | 2/2     | 11/11     | 8/8        | 4/4     | 6/6       |
| 1         | "Bacillus atropsectus" van Hall 1902                | 79     | 7/7              | 6/6            | 8/8     | 6/6    | 12/12 | 10/10  | 2/2   | 4/4      | 10/10   | 2/2     | 11/11     | 8/8        | 4/4     | 6/6       |
| 1         | Erwinia carotovora subsp. atropsectica SCRI1043     | 79     | 7/7              | 6/6            | 8/8     | 6/6    | 12/12 | 10/10  | 2/2   | 4/4      | 10/10   | 2/2     | 11/11     | 8/8        | 4/4     | 6/6       |
| 1         | ATCC 43316                                          | 79     | 7/7              | 6/6            | 8/8     | 6/6    | 12/12 | 10/10  | 2/2   | 4/4      | 10/10   | 2/2     | 11/11     | 8/8        | 4/4     | 6/6       |
| 1         | Pectobacterium carotovorum subsp. wasabiae WPP163   | 79     | 7/7              | 6/6            | 8/8     | 6/6    | 12/12 | 10/10  | 2/2   | 4/4      | 10/10   | 2/2     | 11/11     | 8/8        | 4/4     | 6/6       |
| 1         | Pectobacterium sp. SCC3193                          | 77     | 7/7              | 6/6            | 8/8     | 6/6    | 12/12 | 10/10  | 2/2   | 4/4      | 10/10   | 2/2     | 11/11     | 8/8        | 4/4     | 6/6       |
| 1         | Raoultella                                          | 179    | 3/3              | 3/3            | 3/3     | 3/3    | 3/3   | 3/3    | 3/3   | 3/3      | 3/3     | 3/3     | 3/3       | 3/3        | 3/3     | 3/3       |
| 1         | ATCC 31898                                          | 179    | 3/3              | 3/3            | 3/3     | 3/3    | 3/3   | 3/3    | 3/3   | 3/3      | 3/3     | 3/3     | 3/3       | 3/3        | 3/3     | 3/3       |
| 1         | Raoultella ornitholytica B6                         | 179    | 3/3              | 3/3            | 3/3     | 3/3    | 3/3   | 3/3    | 3/3   | 3/3      | 3/3     | 3/3     | 3/3       | 3/3        | 3/3     | 3/3       |
| 7         | unclassified Enterobacteriaceae (miscellaneous)     | 100    | 7/9              | 6/9            | 10/10   | 4/8    | 11/7  | 12/20  | 3/7   | 5/9      | 7/14    | 5/8     | 4/6       | 13/28      | 8/19    | 8/12      |
| 1         | Cronobacter sp. FG157                               | 28     | 2/6              | 3/6            | 8/6     | 2/6    | 8/12  | 4/12   | 2/6   | 3/10     | 4/8     | 8/23    | 3/12      | 3/6        | 3/8     | 2/6       |
| 6         | ant endosymbionts                                   | 84     | 2/4              | 1/4            | 4/4     | 0/4    | 2/8   | 0/8    | 0/4   | 0/6      | 0/4     | 2/16    | 0/8       | 1/4        | 0/4     | 0/4       |
| 1         | "Candidatus Blochmannia" Sauer et al. 2000          | 154    | 2/4              | 1/4            | 4/4     | 0/4    | 2/8   | 0/8    | 0/4   | 0/6      | 0/4     | 2/16    | 0/8       | 1/4        | 0/4     | 0/4       |
| 1         | "Candidatus Blochmannia pennsylvaniae"              | 440    | 0/1              | 0/1            | 1/1     | 0/1    | 0/2   | 0/2    | 0/1   | 0/1      | 0/2     | 0/1     | 0/1       | 0/1        | 0/1     |           |







|    |                                                                         |                   |             |                   |             |                   |             |                   |             |                   |              |          |                    |              |                 |                            |                            |
|----|-------------------------------------------------------------------------|-------------------|-------------|-------------------|-------------|-------------------|-------------|-------------------|-------------|-------------------|--------------|----------|--------------------|--------------|-----------------|----------------------------|----------------------------|
| 1  | Stenotrophomonas maltophilia K279a                                      | 72/73 3/3 4/4     | 2/2 4/4     | 8/8 4/4 1/1       | 1/1 8/8     | 1/1 3/4 3/3       | 2/2 2/2     | 1/1 4/4 1/1       | 3/3 6/6     | 4/4 1/1 7/7       | 1/1 0/0      | 0/0 0/0  | 0/0 40/73 12/73    | 11/73 9/73   | 1/73            |                            |                            |
| 1  | Burkholderia sp. JV3                                                    | 98/62 100% 100%   | 100% 100%   | 100% 100%         | 100%        | 100% 75%          | 100%        | 100% 100%         | 100%        | 100% 100%         | 100%         | 0%       | 0%                 | 0%           | 54/61B 16/49B   | 15/16AB 12/36B 1/4BE       |                            |
| 1  | Stenotrophomonas maltophilia D457                                       | 72/72 3/3 4/4     | 2/2 4/4     | 8/8 4/4 1/1       | 1/1 8/8     | 1/1 3/4 3/3       | 2/2 2/2     | 1/1 4/4 1/1       | 3/3 6/6     | 4/4 1/1 7/7       | 1/1 0/0      | 0/0 0/0  | 0/0 40/73 12/73    | 11/73 9/73   | 1/73            |                            |                            |
| 1  | Frateria<br>"Aetobacter aurantium" (sic) Kond and<br>Aoyama 1958        | 71/71 3/3 4/4     | 1/1 4/4     | 5/5 4/4 2/2       | 1/1 8/8     | 1/1 4/4 4/4       | 1/1 3/3     | 1/1 4/4 1/1       | 4/4 6/6     | 4/4 1/1 5/5       | 0/0 0/0      | 0/0 0/0  | 0/0 50/71 21/71    | 0/0          | 0/0             | 70/45B 29/96A              |                            |
| 1  | Frateria aurantia DSM 6220                                              | 71/71 3/3 4/4     | 1/1 4/4     | 5/5 4/4 2/2       | 1/1 8/8     | 1/1 4/4 4/4       | 1/1 3/3     | 1/1 4/4 1/1       | 4/4 6/6     | 4/4 1/1 5/5       | 0/0 0/0      | 0/0 0/0  | 0/0 50/71 21/71    | 0/0          | 0/0             | 70/45B 29/96A              |                            |
| 1  | Rhodanobacter                                                           | 49/49 1/1 2/2     | 1/1 2/2     | 4/4 3/3 1/1       | 1/1 4/4     | 1/1 4/4 2/2       | 1/1 2/2     | 1/1 3/3 1/1       | 3/3 4/4     | 2/2 1/1 5/5       | 0/0 0/0      | 0/0 0/0  | 0/0 34/49 15/49    | 0/0          | 0/0             | 69/49AB 30/69AB            |                            |
| 1  | DSM 23569                                                               | 101               | 100%        | 100% 100%         | 100%        | 100% 100%         | 100%        | 100% 100%         | 100%        | 100% 100%         | 100%         | 0%       | 0%                 | 0%           | 69/49AB 30/69AB | 0%                         |                            |
| 2  | Pseudoxanthomonas                                                       | 101               | 100%        | 100% 100%         | 100%        | 100% 100%         | 100%        | 100% 100%         | 100%        | 100% 100%         | 100%         | 0%       | 0%                 | 0%           | 69/49AB 30/69AB | 0%                         |                            |
| 1  | DSM 17175                                                               | 101               | 100%        | 100% 100%         | 100%        | 100% 100%         | 100%        | 100% 100%         | 100%        | 100% 100%         | 100%         | 0%       | 0%                 | 0%           | 69/49AB 30/69AB | 0%                         |                            |
| 1  | Pseudoxanthomonas suwonensis 11-1                                       | 52/52 3/3 1/1     | 1/1 2/2     | 4/4 3/3 1/1       | 1/1 5/5     | 1/1 4/4 2/2       | 1/1 2/2     | 1/1 3/3 1/1       | 3/3 4/4     | 2/2 1/1 6/6       | 0/0 0/0      | 0/0 0/0  | 0/0 34/52 18/52    | 0/0          | 0/0             | 65/49AB 14/69AB            |                            |
| 1  | CCUG 53828                                                              | 49/49 2/2 2/2     | 1/1 1/1     | 4/4 3/3 1/1       | 1/1 3/3     | 1/1 4/4 2/2       | 1/1 2/2     | 1/1 3/3 1/1       | 3/3 4/4     | 2/2 2/2 5/5       | 0/0 0/0      | 0/0 0/0  | 0/0 33/49 16/49    | 0/0          | 0/0             | 67/36AB 32/76AB            |                            |
| 1  | Pseudoxanthomonas spadic BO-a59                                         | 49/49 2/2 2/2     | 1/1 1/1     | 4/4 3/3 1/1       | 1/1 3/3     | 1/1 4/4 2/2       | 1/1 2/2     | 1/1 3/3 1/1       | 3/3 4/4     | 2/2 2/2 5/5       | 0/0 0/0      | 0/0 0/0  | 0/0 33/49 16/49    | 0/0          | 0/0             | 67/36AB 32/76AB            |                            |
| 1  | Cardiobacteriaceae group                                                | 44/44 1/1 2/2     | 2/2 3/3     | 2/2 2/2 1/1       | 1/1 4/4     | 1/1 3/3 2/2       | 1/1 1/1     | 1/1 3/3 1/1       | 2/2 3/3     | 2/2 1/1 5/5       | 0/0 0/0      | 0/0 0/0  | 0/0 32/44 12/44    | 0/0          | 0/0             | 72/74AB 22/36AB            |                            |
| 1  | Cardiobacteriaceae                                                      | 44/44 1/1 2/2     | 2/2 3/3     | 2/2 2/2 1/1       | 1/1 4/4     | 1/1 3/3 2/2       | 1/1 1/1     | 1/1 3/3 1/1       | 2/2 3/3     | 2/2 1/1 5/5       | 0/0 0/0      | 0/0 0/0  | 0/0 32/44 12/44    | 0/0          | 0/0             | 72/74AB 22/36AB            |                            |
| 1  | Dichelobacter                                                           | 44/44 1/1 2/2     | 2/2 3/3     | 2/2 2/2 1/1       | 1/1 4/4     | 1/1 3/3 2/2       | 1/1 1/1     | 1/1 3/3 1/1       | 2/2 3/3     | 2/2 1/1 5/5       | 0/0 0/0      | 0/0 0/0  | 0/0 32/44 12/44    | 0/0          | 0/0             | 72/74AB 22/36AB            |                            |
| 1  | "Fusiformis nodosus" Beveridge 1941                                     | 44/44 1/1 2/2     | 2/2 3/3     | 2/2 2/2 1/1       | 1/1 4/4     | 1/1 3/3 2/2       | 1/1 1/1     | 1/1 3/3 1/1       | 2/2 3/3     | 2/2 1/1 5/5       | 0/0 0/0      | 0/0 0/0  | 0/0 32/44 12/44    | 0/0          | 0/0             | 72/74AB 22/36AB            |                            |
| 1  | Dichelobacter nodosus VCS1703A                                          | 44/44 1/1 2/2     | 2/2 3/3     | 2/2 2/2 1/1       | 1/1 4/4     | 1/1 3/3 2/2       | 1/1 1/1     | 1/1 3/3 1/1       | 2/2 3/3     | 2/2 1/1 5/5       | 0/0 0/0      | 0/0 0/0  | 0/0 32/44 12/44    | 0/0          | 0/0             | 72/74AB 22/36AB            |                            |
| 2  | Methylococcalea group                                                   | 11/11 2/2 3/3     | 2/2 5/5     | 6/6 6/6 2/2       | 2/2 7/7     | 2/2 7/7 3/3       | 3/3 3/3     | 2/2 5/5 2/2       | 6/6 8/8     | 4/4 2/2 10/10     | 0/0 0/0      | 0/0 0/0  | 0/0 64/11 27/11    | 0/0          | 0/0             | 70/39AB 29/76AB            |                            |
| 2  | Methylococaceae                                                         | 11/11 2/2 3/3     | 2/2 5/5     | 6/6 6/6 2/2       | 2/2 7/7     | 2/2 7/7 3/3       | 3/3 3/3     | 2/2 5/5 2/2       | 6/6 8/8     | 4/4 2/2 10/10     | 0/0 0/0      | 0/0 0/0  | 0/0 64/11 27/11    | 0/0          | 0/0             | 70/39AB 29/76AB            |                            |
| 1  | Methylococcus                                                           | 10/10 1/1 1/1     | 1/1 2/2     | 3/3 3/3 1/1       | 1/1 3/3     | 1/1 4/4 2/2       | 1/1 2/2     | 1/1 3/3 1/1       | 3/3 4/4     | 2/2 1/1 5/5       | 0/0 0/0      | 0/0 0/0  | 0/0 32/46 14/46    | 0/0          | 0/0             | 69/49AB 30/69AB            |                            |
| 1  | ACM 1292                                                                | 46/46 1/1 1/1     | 1/1 2/2     | 3/3 3/3 1/1       | 1/1 3/3     | 1/1 4/4 2/2       | 1/1 2/2     | 1/1 3/3 1/1       | 3/3 4/4     | 2/2 1/1 5/5       | 0/0 0/0      | 0/0 0/0  | 0/0 32/46 14/46    | 0/0          | 0/0             | 69/49AB 30/69AB            |                            |
| 1  | Methylococcus capsulatus ATCC 33009                                     | 46/46 1/1 1/1     | 1/1 2/2     | 3/3 3/3 1/1       | 1/1 3/3     | 1/1 4/4 2/2       | 1/1 2/2     | 1/1 3/3 1/1       | 3/3 4/4     | 2/2 1/1 5/5       | 0/0 0/0      | 0/0 0/0  | 0/0 32/46 14/46    | 0/0          | 0/0             | 69/49AB 30/69AB            |                            |
| 1  | "Methanoxilus" Orla-Jensen 1909                                         | 45/45 1/1 2/2     | 1/1 3/3     | 2/2 3/3 1/1       | 1/1 4/4     | 1/1 3/3 1/1       | 2/2 1/1     | 1/1 2/2 1/1       | 3/3 4/4     | 2/2 1/1 5/5       | 0/0 0/0      | 0/0 0/0  | 0/0 32/45 13/45    | 0/0          | 0/0             | 71/16AB 28/96AB            |                            |
| 1  | "Bailliu methanicus" Sohngen 1906                                       | 45/45 1/1 2/2     | 1/1 3/3     | 2/2 3/3 1/1       | 1/1 4/4     | 1/1 3/3 1/1       | 2/2 1/1     | 1/1 2/2 1/1       | 3/3 4/4     | 2/2 1/1 5/5       | 0/0 0/0      | 0/0 0/0  | 0/0 32/45 13/45    | 0/0          | 0/0             | 71/16AB 28/96AB            |                            |
| 1  | Methylococcus methanica MC09                                            | 45/45 1/1 2/2     | 1/1 3/3     | 2/2 3/3 1/1       | 1/1 4/4     | 1/1 3/3 1/1       | 2/2 1/1     | 1/1 2/2 1/1       | 3/3 4/4     | 2/2 1/1 5/5       | 0/0 0/0      | 0/0 0/0  | 0/0 32/45 13/45    | 0/0          | 0/0             | 71/16AB 28/96AB            |                            |
| 1  | Methylococcus methanica MC09                                            | 45/45 1/1 2/2     | 1/1 3/3     | 2/2 3/3 1/1       | 1/1 4/4     | 1/1 3/3 1/1       | 2/2 1/1     | 1/1 2/2 1/1       | 3/3 4/4     | 2/2 1/1 5/5       | 0/0 0/0      | 0/0 0/0  | 0/0 32/45 13/45    | 0/0          | 0/0             | 71/16AB 28/96AB            |                            |
| 18 | Oceanospirillales                                                       | 10/27 29/36 30/47 | 10/27 29/36 | 30/47 31/32 32/20 | 31/32 42/41 | 11/19 33/39 24/32 | 13/21 19/27 | 12/20 30/38 15/23 | 33/45 50/68 | 17/40 10/19 58/62 | 0/0 0/0      | 0/0 0/0  | 0/0 42/152 185/152 | 96/152 2/152 | 0/152           | 87/29AB 16/152 11/35 2/35C |                            |
| 10 | Alcanivorax/Fundibacter group                                           | 151               | 100%        | 100% 100%         | 100%        | 100% 100%         | 100%        | 100% 100%         | 100%        | 100% 100%         | 100%         | 0%       | 0%                 | 0%           | 137/108 25/76   | 34/108 41/369 41/369 2/369 |                            |
| 1  | Deleya                                                                  | 98/98 3/3 4/4     | 2/2 5/5     | 6/6 6/6 2/2       | 2/2 7/7     | 2/2 7/7 3/3       | 3/3 3/3     | 2/2 5/5 2/2       | 6/6 8/8     | 4/4 2/2 10/10     | 0/0 0/0      | 0/0 0/0  | 0/0 64/11 27/11    | 0/0          | 0/0             | 70/39AB 29/76AB            |                            |
| 1  | ATCC 33173                                                              | 98/98 3/3 4/4     | 2/2 5/5     | 6/6 6/6 2/2       | 2/2 7/7     | 2/2 7/7 3/3       | 3/3 3/3     | 2/2 5/5 2/2       | 6/6 8/8     | 4/4 2/2 10/10     | 0/0 0/0      | 0/0 0/0  | 0/0 64/11 27/11    | 0/0          | 0/0             | 70/39AB 29/76AB            |                            |
| 1  | Halomonas elongata ATCC 33173                                           | 98/98 3/3 4/4     | 2/2 5/5     | 6/6 6/6 2/2       | 2/2 7/7     | 2/2 7/7 3/3       | 3/3 3/3     | 2/2 5/5 2/2       | 6/6 8/8     | 4/4 2/2 10/10     | 0/0 0/0      | 0/0 0/0  | 0/0 64/11 27/11    | 0/0          | 0/0             | 70/39AB 29/76AB            |                            |
| 1  | Chromobacter                                                            | 89/89 2/2 3/3     | 3/3 5/5     | 5/5 4/4 2/2       | 1/1 7/7     | 1/1 4/4 3/3       | 1/1 2/2     | 1/1 3/3 2/2       | 3/3 5/5     | 4/4 1/1 7/7       | 0/0 0/0      | 0/0 0/0  | 0/0 49/69 20/69    | 0/0          | 0/0             | 74/15AB 29/96AB            |                            |
| 1  | ATCC BAA-138                                                            | 89/89 2/2 3/3     | 3/3 5/5     | 5/5 4/4 2/2       | 1/1 7/7     | 1/1 4/4 3/3       | 1/1 2/2     | 1/1 3/3 2/2       | 3/3 5/5     | 4/4 1/1 7/7       | 0/0 0/0      | 0/0 0/0  | 0/0 49/69 20/69    | 0/0          | 0/0             | 74/15AB 29/96AB            |                            |
| 1  | Chromobacter salexigenis 1H11                                           | 89/89 2/2 3/3     | 3/3 5/5     | 5/5 4/4 2/2       | 1/1 7/7     | 1/1 4/4 3/3       | 1/1 2/2     | 1/1 3/3 2/2       | 3/3 5/5     | 4/4 1/1 7/7       | 0/0 0/0      | 0/0 0/0  | 0/0 49/69 20/69    | 0/0          | 0/0             | 74/15AB 29/96AB            |                            |
| 8  | Zymobacter<br>"Candidatus Carsonella" Thao et al.<br>2000               | 0/24 12/28 0/6    | 0/6 0/6     | 0/12 0/6 0/6      | 0/6 0/6     | 0/6 0/18 0/6      | 0/6 0/6     | 0/6 0/6           | 0/6 0/6     | 0/6 0/12 0/6      | 0/6 0/18 0/6 | 0/6 0/18 | 0/6 0/18           | 0/6 0/18     | 0/6 0/18        | 0/6 0/18                   | 0/101 167/167 65/167 1/167 |
| 6  | "Candidatus Carsonella ruddii" Thao et al. 2000                         | 0/0 0/0 0/0       | 0/0 0/0     | 0/0 0/0           | 0/0 0/0     | 0/0 0/0           | 0/0 0/0     | 0/0 0/0           | 0/0 0/0     | 0/0 0/0           | 0/0 0/0      | 0/0 0/0  | 0/0 0/0            | 0/0 0/0      | 0/0 0/0         | 0/65 58/65 38/95 0/65C     |                            |
| 1  | primary endosymbiont of Heterospylla cubana                             | 0/28 0/1 0/1      | 0/1 0/1     | 0/2 0/1 0/1       | 0/1 0/1     | 0/1 0/3 0/1       | 0/1 0/1     | 0/1 0/1           | 0/1 0/1     | 0/1 0/2 0/1       | 0/1 0/3 0/1  | 0/1 0/3  | 0/1 0/3            | 0/1 0/3      | 0/1 0/3         | 0/19 28 9/28               |                            |
| 1  | Candidatus Carsonella ruddii HC isolate Thao2000                        | 0/28 0/1 0/1      | 0/1 0/1     | 0/2 0/1 0/1       | 0/1 0/1     | 0/1 0/3 0/1       | 0/1 0/1     | 0/1 0/1           | 0/1 0/1     | 0/1 0/2 0/1       | 0/1 0/3 0/1  | 0/1 0/3  | 0/1 0/3            | 0/1 0/3      | 0/1 0/3         | 0/19 33 14/33              |                            |
| 1  | Candidatus Carsonella ruddii PV isolate Thao2000                        | 0/28 0/1 0/1      | 0/1 0/1     | 0/2 0/1 0/1       | 0/1 0/1     | 0/1 0/3 0/1       | 0/1 0/1     | 0/1 0/1           | 0/1 0/1     | 0/1 0/2 0/1       | 0/1 0/3 0/1  | 0/1 0/3  | 0/1 0/3            | 0/1 0/3      | 0/1 0/3         | 0/19 33 14/33              |                            |
| 1  | Candidatus Carsonella ruddii CS isolate Thao2000                        | 0/28 0/1 0/1      | 0/1 0/1     | 0/2 0/1 0/1       | 0/1 0/1     | 0/1 0/3 0/1       | 0/1 0/1     | 0/1 0/1           | 0/1 0/1     | 0/1 0/2 0/1       | 0/1 0/3 0/1  | 0/1 0/3  | 0/1 0/3            | 0/1 0/3      | 0/1 0/3         | 0/19 33 14/33              |                            |
| 1  | Candidatus Carsonella ruddii HT isolate Thao2000                        | 0/28 0/1 0/1      | 0/1 0/1     | 0/2 0/1 0/1       | 0/1 0/1     | 0/1 0/3 0/1       | 0/1 0/1     | 0/1 0/1           | 0/1 0/1     | 0/1 0/2 0/1       | 0/1 0/3 0/1  | 0/1 0/3  | 0/1 0/3            | 0/1 0/3      | 0/1 0/3         | 0/19 33 14/33              |                            |
| 1  | Candidatus Carsonella ruddii PC isolate NHV                             | 0/28 0/1 0/1      | 0/1 0/1     | 0/2 0/1 0/1       | 0/1 0/1     | 0/1 0/3 0/1       | 0/1 0/1     | 0/1 0/1           | 0/1 0/1     | 0/1 0/2 0/1       | 0/1 0/3 0/1  | 0/1 0/3  | 0/1 0/3            | 0/1 0/3      | 0/1 0/3         | 0/19 33 14/33              |                            |
| 2  | whitely endosymbionts<br>"Candidatus Portiera" Thao and<br>Baumann 2004 | 1/67 1/2 0/2      | 0/2 0/2     | 0/4 0/4 0/2       | 0/2 0/3     | 0/2 0/8 0/2       | 0/2 0/2     | 0/2 0/2           | 0/2 0/8     | 0/6 0/6           | 0/2 0/2 0/6  | 0/6 0/6  | 0/6 0/6            | 0/6 0/6      | 0/6 0/6         | 0/36 67 30/67 1/67         |                            |
| 2  | "Candidatus Portiera aleyrodorum" Thao and Baumann 2004                 | 1/67 1/2 0/2      | 0/2 0/2     | 0/4 0/4 0/2       | 0/2 0/3     | 0/2 0/8 0/2       | 0/2 0/2     | 0/2 0/2           | 0/2 0/8     | 0/6 0/6           | 0/2 0/2 0/6  | 0/6 0/6  | 0/6 0/6            | 0/6 0/6      | 0/6 0/6         | 0/36 67 30/67 1/67         |                            |
| 1  | Candidatus Portiera aleyrodorum BT-B                                    | 0/28 0/1 0/1      | 0/1 0/1     | 0/2 0/2 0/1       | 0/1 0/1     | 0/1 0/4 0/1       | 0/1 0/1     | 0/1 0/1           | 0/1 0/3     | 0/3 0/3           | 0/1 0/1 0/3  | 0/1 0/3  | 0/1 0/3            | 0/1 0/3      | 0/1 0/3         | 0/19 33 14/33              |                            |
| 1  | Candidatus Portiera aleyrodorum TV                                      | 0/28 0/1 0/1      | 0/1 0/1     | 0/2 0/2 0/1       | 0/1 0/1     | 0/1 0/4 0/1       | 0/1 0/1     | 0/1 0/1           | 0/1 0/3     | 0/3 0/3           | 0/1 0/1 0/3  | 0/1 0/3  | 0/1 0/3            | 0/1 0/3      | 0/1 0/3         | 0/19 33 14/33              |                            |
| 1  | Alcanivorax/Fundibacter group                                           | 231               | 100%        | 100% 100%         | 100%        | 100% 100%         | 100%        | 100% 100%         | 100%        | 100% 100%         | 100%         | 0%       | 0%                 | 0%           | 201/291 90/291  | 69/15AB 30/96AB            |                            |
| 1  | Marinomonas                                                             | 241               | 100%        | 100% 100%         | 100%        | 100% 100%         | 100%        | 100% 100%         | 100%        | 100% 100%         | 100%         | 0%       | 0%                 | 0%           | 187/241 74/241  | 67/241 20/96AB             |                            |
| 1  | ATCC 700492                                                             | 18/18 5/5 7/7     | 2/2 3/3     | 5/5 7/7 1/1       | 2/2 4/4     | 1/1 3/3 4/4       | 2/2 3/3     | 2/2 3/3 2/2       | 5/5 6/6     | 3/3 1/1 7/7       | 0/0 0/0      | 0/0 0/0  | 0/0 55/78 23/78    | 0/0          | 0/0             | 70/59AB 29/96AB            |                            |
| 1  | Marinomonas mediterranea MMB-1                                          | 80/80 5/5 6/6     | 2/2 3/3     | 7/7 7/7 1/1       | 2/2 5/5     | 1/1 3/3 3/3       | 1/1 3/3     | 1/1 3/3 2/2       | 5/5 6/6     | 7/7 1/1 6/6       | 0/0 0/0      | 0/0 0/0  | 0/0 55/80 25/80    | 0/0          | 0/0             | 70/59AB 29/96AB            |                            |
| 1  | Marinomonas sp. MWYL1                                                   | 80/80 5/5 6/6     | 2/2 3/3     | 7/7 7/7 1/1       | 2/2 5/5     | 1/1 3/3 3/3       | 1/1 3/3     | 1/1 3/3 2/2       | 5/5 6/6     | 7/7 1/1 6/6       | 0/0 0/0      | 0/0 0/0  | 0/0 55/80 25/80    | 0/0          | 0/0             | 70/59AB 29/96AB            |                            |
| 1  | Marinomonas positonica'                                                 | 80/80 5/5 6/6     | 2/2 3/3     | 7/7 7/7 1/1       | 2/2 5/5     | 1/1 3/3 3/3       | 1/1 3/3     | 1/1 3/3 2/2       | 5/5 6/6     | 7/7 1/1 6/6       | 0/0 0/0      | 0/0 0/0  | 0/0 55/80 25/80    | 0/0          | 0/0             | 70/59AB 29/96AB            |                            |
| 1  | Marinomonas positonica IVIA-PO-181                                      | 80/80 5/5 6/6     | 2/2 3/3     | 7/7 7/7 1/1       | 2/2 5/5     | 1/1 3/3 3/3       | 1/1 3/3     | 1/1 3/3 2/2       | 5/5 6/6     | 7/7 1/1 6/6       | 0/0 0/0      | 0/0 0/0  | 0/0 55/80 25/80    | 0/0          | 0/0             | 70/59AB 29/96AB            |                            |
| 1  | Thalassotilus                                                           | 50/50 2/2 4/4     | 2/2 1/1     | 4/4 4/4 1/1       | 1/1 2/2     | 1/1 3/3 2/2       | 1/1 1/1     | 1/1 3/3 1/1       | 2/2 5/5     | 3/3 1/1 5/5       | 0/0 0/0      | 0/0 0/0  | 0/0 34/50 16/50    | 0/0          |                 |                            |                            |

|    |                                                                          |         |         |        |         |        |         |         |        |        |         |         |         |        |         |        |         |         |       |       |         |         |         |       |     |     |
|----|--------------------------------------------------------------------------|---------|---------|--------|---------|--------|---------|---------|--------|--------|---------|---------|---------|--------|---------|--------|---------|---------|-------|-------|---------|---------|---------|-------|-----|-----|
| 1  | <i>Shewanella</i>                                                        | 100.00  | 100.00  | 100.00 | 100.00  | 100.00 | 100.00  | 100.00  | 100.00 | 100.00 | 100.00  | 100.00  | 100.00  | 100.00 | 100.00  | 100.00 | 100.00  | 100.00  | 0.00  | 0.00  | 0.00    | 71.0%AB | 29.0%AB |       |     |     |
| 1  | <i>Alteromonas macleodii</i> str. 'Ionian Sea U4'                        | 49/49   | 3/3     | 4/4    | 2/2     | 4/4    | 1/1     | 1/1     | 2/2    | 0/0    | 3/5     | 2/2     | 4/4     | 0/0    | 1/1     | 2/2    | 1/1     | 4/4     | 0/0   | 0/0   | 0/0     | 0/0     | 32/49   | 17/49 |     |     |
| 1  | <i>Alteromonas macleodii</i> str. 'Ionian Sea UT'                        | 99/99   | 2/2     | 2/2    | 2/2     | 2/2    | 4/4     | 4/4     | 1/1    | 1/1    | 3/3     | 2/2     | 4/4     | 2/2    | 1/1     | 4/4    | 1/1     | 2/2     | 1/1   | 3/3   | 5/5     | 4/4     | 1/1     | 8/8   | 0/0 |     |
| 1  | <i>Alteromonas macleodii</i> str. 'Ionian Sea UB'                        | 54/54   | 0/0     | 3/4    | 2/2     | 2/2    | 3/3     | 4/4     | 2/2    | 2/2    | 3/3     | 1/1     | 2/2     | 3/3    | 1/1     | 2/2    | 1/1     | 4/4     | 0/0   | 4/4   | 4/4     | 3/3     | 1/1     | 6/6   | 0/0 |     |
| 1  | <i>Alteromonas macleodii</i> str. 'Ionian Sea UM7'                       | 80/80   | 2/2     | 4/4    | 2/2     | 3/3    | 2/2     | 1/1     | 1/1    | 2/2    | 1/1     | 4/4     | 2/2     | 3/3    | 1/1     | 3/3    | 1/1     | 4/4     | 2/2   | 3/3   | 5/5     | 3/3     | 1/1     | 7/7   | 0/0 |     |
| 1  | <i>Alteromonas macleodii</i> str. 'Ionian Sea UM4b'                      | 87/87   | 2/2     | 4/4    | 2/2     | 3/3    | 2/2     | 3/3     | 2/2    | 2/2    | 1/1     | 4/4     | 2/2     | 4/4    | 2/2     | 1/1    | 2/2     | 1/1     | 3/3   | 0/0   | 5/3     | 8/8     | 4/4     | 1/1   | 5/5 | 0/0 |
| 1  | <i>Alteromonas</i> sp. SN2                                               | 54/54   | 2/2     | 4/4    | 2/2     | 3/3    | 4/4     | 5/5     | 1/1    | 1/1    | 4/4     | 2/2     | 5/5     | 3/3    | 1/1     | 3/3    | 1/1     | 3/3     | 1/1   | 5/3   | 5/5     | 4/4     | 1/1     | 6/6   | 0/0 |     |
| 4  | <i>Marinobacter</i>                                                      | 199     | 9/8     | 8/8    | 8/8     | 12/12  | 13/13   | 12/12   | 4/4    | 4/4    | 16/16   | 4/4     | 12/12   | 9/8    | 8/4     | 4/4    | 4/4     | 12/12   | 4/4   | 7/7   | 20/20   | 8/8     | 4/4     | 20/20 | 0/0 |     |
| 2  | ATCC 49840                                                               | 101     | 4/4     | 4/4    | 4/4     | 6/6    | 8/8     | 6/6     | 2/2    | 2/2    | 8/8     | 2/2     | 6/6     | 5/5    | 2/2     | 2/2    | 2/2     | 6/6     | 2/2   | 4/4   | 10/10   | 4/4     | 2/2     | 10/10 | 0/0 |     |
| 1  | <i>Marinobacter aquaeolei</i> V78                                        | 51/51   | 2/2     | 2/2    | 2/2     | 3/3    | 3/3     | 1/1     | 1/1    | 4/4    | 1/1     | 3/3     | 3/3     | 1/1    | 1/1     | 1/1    | 3/3     | 1/1     | 2/2   | 5/5   | 2/2     | 1/1     | 5/5     | 0/0   | 0/0 |     |
| 1  | <i>Marinobacter hydrocarbonoclasticus</i> ATCC 49840                     | 50/50   | 2/2     | 2/2    | 2/2     | 3/3    | 4/4     | 3/3     | 1/1    | 1/1    | 4/4     | 3/3     | 2/2     | 1/1    | 1/1     | 1/1    | 3/3     | 1/1     | 2/2   | 5/5   | 2/2     | 1/1     | 5/5     | 0/0   | 0/0 |     |
| 1  | <i>Marinobacter</i> sp. BS20148                                          | 48/48   | 2/2     | 2/2    | 2/2     | 3/3    | 3/3     | 1/1     | 1/1    | 4/4    | 1/1     | 3/3     | 2/2     | 1/1    | 1/1     | 1/1    | 3/3     | 1/1     | 2/2   | 5/5   | 2/2     | 1/1     | 5/5     | 0/0   | 0/0 |     |
| 1  | <i>Marinobacter adhaerens</i> Gardes et al. 2010                         | 48/48   | 2/2     | 2/2    | 2/2     | 3/3    | 4/4     | 3/3     | 1/1    | 1/1    | 4/4     | 1/1     | 3/3     | 2/2    | 1/1     | 1/1    | 3/3     | 1/1     | 1/1   | 5/5   | 2/2     | 1/1     | 5/5     | 0/0   | 0/0 |     |
| 1  | <i>Marinobacter adhaerens</i> HP15                                       | 48/48   | 2/2     | 2/2    | 2/2     | 3/3    | 4/4     | 3/3     | 1/1    | 1/1    | 4/4     | 1/1     | 3/3     | 2/2    | 1/1     | 1/1    | 3/3     | 1/1     | 1/1   | 5/5   | 2/2     | 1/1     | 5/5     | 0/0   | 0/0 |     |
| 3  | <i>Glaciecola</i>                                                        | 172     | 7/7     | 7/7    | 6/6     | 15/15  | 10/10   | 7/7     | 3/3    | 2/3    | 18/18   | 9/6     | 10/10   | 7/7    | 3/3     | 9/9    | 2/3     | 8/8     | 3/3   | 9/9   | 14/14   | 6/6     | 3/3     | 15/15 | 0/0 |     |
| 1  | <i>Glaciecola nitratireducens</i>                                        | 54/54   | 1/1     | 3/3    | 2/2     | 4/4    | 3/3     | 3/3     | 1/1    | 1/1    | 5/5     | 2/2     | 3/3     | 2/2    | 1/1     | 3/3    | 1/1     | 3/3     | 1/1   | 3/3   | 4/4     | 2/2     | 1/1     | 5/5   | 0/0 |     |
| 1  | <i>Glaciecola nitratireducens</i> FR1064                                 | 54/54   | 1/1     | 3/3    | 2/2     | 4/4    | 3/3     | 3/3     | 1/1    | 1/1    | 5/5     | 2/2     | 3/3     | 2/2    | 1/1     | 3/3    | 1/1     | 3/3     | 1/1   | 3/3   | 4/4     | 2/2     | 1/1     | 5/5   | 0/0 |     |
| 1  | CGMCC 1.6130                                                             | 2/2     | 1/1     | 7/7    | 1/1     | 7/7    | 1/1     | 1/1     | 7/7    | 1/1    | 1/1     | 7/7     | 1/1     | 1/1    | 1/1     | 1/1    | 1/1     | 3/3     | 1/1   | 3/3   | 1/1     | 1/1     | 5/5     | 0/0   | 0/0 |     |
| 1  | <i>Glaciecola psychrophila</i> 170                                       | 58/58   | 3/3     | 3/3    | 2/2     | 5/5    | 4/4     | 2/2     | 1/1    | 1/1    | 6/6     | 2/2     | 4/4     | 2/2    | 1/1     | 3/3    | 1/1     | 2/2     | 1/1   | 3/3   | 5/5     | 2/2     | 1/1     | 5/5   | 0/0 |     |
| 1  | <i>Glaciecola agaralitica</i> 4H-3-7+YE-5                                | 40/40   | 1/1     | 2/2    | 2/2     | 1/1    | 2/2     | 3/3     | 1/1    | 1/1    | 2/2     | 1/1     | 3/3     | 2/2    | 1/1     | 1/1    | 1/1     | 2/2     | 1/1   | 2/2   | 4/4     | 1/1     | 1/1     | 5/5   | 0/0 |     |
| 1  | <i>Saccharophagus</i>                                                    | 40/40   | 1/1     | 2/2    | 2/2     | 1/1    | 2/2     | 3/3     | 1/1    | 1/1    | 2/2     | 1/1     | 3/3     | 2/2    | 1/1     | 1/1    | 1/1     | 2/2     | 1/1   | 2/2   | 4/4     | 1/1     | 1/1     | 5/5   | 0/0 |     |
| 1  | ATCC 43961                                                               | 40/40   | 1/1     | 2/2    | 2/2     | 1/1    | 2/2     | 3/3     | 1/1    | 1/1    | 2/2     | 1/1     | 3/3     | 2/2    | 1/1     | 1/1    | 1/1     | 2/2     | 1/1   | 2/2   | 4/4     | 1/1     | 1/1     | 5/5   | 0/0 |     |
| 1  | <i>Microbulfiber degradans</i> 2-40                                      | 40/40   | 1/1     | 2/2    | 2/2     | 1/1    | 2/2     | 3/3     | 1/1    | 1/1    | 2/2     | 1/1     | 3/3     | 2/2    | 1/1     | 1/1    | 1/1     | 2/2     | 1/1   | 2/2   | 4/4     | 1/1     | 1/1     | 5/5   | 0/0 |     |
| 1  | <i>Alteromonadaceae</i> genera incertae sedis                            | 39/39   | 1/1     | 2/2    | 2/2     | 1/1    | 2/2     | 3/3     | 1/1    | 1/1    | 2/2     | 1/1     | 3/3     | 2/2    | 1/1     | 1/1    | 1/1     | 2/2     | 1/1   | 2/2   | 3/3     | 1/1     | 1/1     | 5/5   | 0/0 |     |
| 1  | 'Teredinibacter' Waterbury et al. 1989                                   | 39/39   | 1/1     | 2/2    | 2/2     | 1/1    | 2/2     | 3/3     | 1/1    | 1/1    | 2/2     | 1/1     | 3/3     | 2/2    | 1/1     | 1/1    | 1/1     | 2/2     | 1/1   | 2/2   | 3/3     | 1/1     | 1/1     | 5/5   | 0/0 |     |
| 1  | 'Teredinibacter turnerae' Waterbury et al. 1989                          | 39/39   | 1/1     | 2/2    | 2/2     | 1/1    | 2/2     | 3/3     | 1/1    | 1/1    | 2/2     | 1/1     | 3/3     | 2/2    | 1/1     | 1/1    | 1/1     | 2/2     | 1/1   | 2/2   | 3/3     | 1/1     | 1/1     | 5/5   | 0/0 |     |
| 1  | <i>Teredinibacter turnerae</i> T7901                                     | 39/39   | 1/1     | 2/2    | 2/2     | 1/1    | 2/2     | 3/3     | 1/1    | 1/1    | 2/2     | 1/1     | 3/3     | 2/2    | 1/1     | 1/1    | 1/1     | 2/2     | 1/1   | 2/2   | 3/3     | 1/1     | 1/1     | 5/5   | 0/0 |     |
| 3  | <i>Pseudoalteromonadaceae</i>                                            | 229     | 11/11   | 15/15  | 7/7     | 8/8    | 17/17   | 19/19   | 5/5    | 6/6    | 13/13   | 9/6     | 17/17   | 12/12  | 8/8     | 8/8    | 5/5     | 9/9     | 4/4   | 10/10 | 18/18   | 11/11   | 3/3     | 19/19 | 0/0 |     |
| 3  | <i>Pseudoalteromonas</i>                                                 | 229     | 11/11   | 15/15  | 7/7     | 8/8    | 17/17   | 19/19   | 5/5    | 6/6    | 13/13   | 9/6     | 17/17   | 12/12  | 8/8     | 8/8    | 5/5     | 9/9     | 4/4   | 10/10 | 18/18   | 11/11   | 3/3     | 19/19 | 0/0 |     |
| 1  | 'Alteromonas marinopraesens' (ZoBell and Upham 1944) Baumann et al. 1972 | 105     | 4/4     | 11/11  | 4/4     | 2/2    | 7/7     | 9/9     | 2/2    | 3/3    | 4/4     | 2/2     | 7/7     | 8/8    | 3/3     | 4/4    | 2/2     | 4/4     | 2/2   | 4/4   | 7/7     | 6/6     | 1/1     | 9/9   | 0/0 |     |
| 1  | <i>Pseudoalteromonas haloplanktis</i> TAC125                             | 105     | 4/4     | 11/11  | 4/4     | 2/2    | 7/7     | 9/9     | 2/2    | 3/3    | 4/4     | 2/2     | 7/7     | 8/8    | 3/3     | 4/4    | 2/2     | 4/4     | 2/2   | 4/4   | 7/7     | 6/6     | 1/1     | 9/9   | 0/0 |     |
| 1  | ATCC 19262                                                               | 105     | 4/4     | 11/11  | 4/4     | 2/2    | 7/7     | 9/9     | 2/2    | 3/3    | 4/4     | 2/2     | 7/7     | 8/8    | 3/3     | 4/4    | 2/2     | 4/4     | 2/2   | 4/4   | 7/7     | 6/6     | 1/1     | 9/9   | 0/0 |     |
| 1  | <i>Pseudoalteromonas atlantica</i> T6c                                   | 102     | 6/2     | 3/3    | 3/3     | 3/3    | 4/4     | 4/4     | 1/1    | 1/1    | 6/6     | 2/2     | 4/4     | 2/2    | 1/1     | 3/3    | 1/1     | 2/2     | 1/1   | 3/3   | 5/5     | 3/3     | 1/1     | 5/5   | 0/0 |     |
| 1  | <i>Pseudoalteromonas</i> sp. SM9913                                      | 102     | 6/2     | 3/3    | 3/3     | 3/3    | 4/4     | 4/4     | 1/1    | 1/1    | 6/6     | 2/2     | 4/4     | 2/2    | 1/1     | 3/3    | 1/1     | 2/2     | 1/1   | 3/3   | 5/5     | 3/3     | 1/1     | 5/5   | 0/0 |     |
| 1  | <i>Colwelliaceae</i>                                                     | 88/88   | 6/6     | 5/5    | 4/4     | 2/2    | 5/5     | 7/7     | 2/2    | 2/2    | 8/8     | 2/2     | 5/5     | 6/6    | 2/2     | 2/2    | 1/1     | 5/5     | 2/2   | 3/3   | 5/5     | 6/6     | 1/1     | 7/7   | 0/0 |     |
| 1  | <i>Colwellia</i>                                                         | 88/88   | 6/6     | 5/5    | 4/4     | 2/2    | 5/5     | 7/7     | 2/2    | 2/2    | 8/8     | 2/2     | 5/5     | 6/6    | 2/2     | 2/2    | 1/1     | 5/5     | 2/2   | 3/3   | 5/5     | 6/6     | 1/1     | 7/7   | 0/0 |     |
| 1  | 'Vibrio psychroerythrus' D'Aoust and Kushner 1972                        | 88/88   | 6/6     | 5/5    | 4/4     | 2/2    | 5/5     | 7/7     | 2/2    | 2/2    | 8/8     | 2/2     | 5/5     | 6/6    | 2/2     | 2/2    | 1/1     | 5/5     | 2/2   | 3/3   | 5/5     | 6/6     | 1/1     | 7/7   | 0/0 |     |
| 1  | <i>Colwellia psycherythraea</i> 34H                                      | 88/88   | 6/6     | 5/5    | 4/4     | 2/2    | 5/5     | 7/7     | 2/2    | 2/2    | 8/8     | 2/2     | 5/5     | 6/6    | 2/2     | 2/2    | 1/1     | 5/5     | 2/2   | 3/3   | 5/5     | 6/6     | 1/1     | 7/7   | 0/0 |     |
| 24 | <i>Shewanellaceae</i>                                                    | 252/252 | 149/149 | 98/98  | 127/127 | 69/69  | 107/107 | 205/205 | 48/48  | 7/7    | 107/107 | 159/159 | 252/252 | 98/98  | 127/127 | 69/69  | 107/107 | 205/205 | 48/48 | 7/7   | 107/107 | 159/159 | 252/252 | 98/98 |     |     |
| 24 | <i>Shewanella</i>                                                        | 252/252 | 149/149 | 98/98  | 127/127 | 69/69  | 107/107 | 205/205 | 48/48  | 7/7    | 107/107 | 159/159 | 252/252 | 98/98  | 127/127 | 69/69  | 107/107 | 205/205 | 48/48 | 7/7   | 107/107 | 159/159 | 252/252 | 98/98 |     |     |
| 1  | 'Pseudomonas putrefaciens' (Derby and Hammer) Long and Hammer 1941       | 201     | 11/11   | 8/8    | 10/10   | 6/6    | 14/14   | 15/15   | 4/4    | 8/8    | 10/10   | 2/2     | 12/12   | 11/11  | 6/6     | 6/6    | 4/4     | 8/8     | 4/4   | 10/10 | 18/18   | 14/14   | 2/2     | 18/18 | 0/0 |     |
| 1  | <i>Shewanella putrefaciens</i> CN-32                                     | 101     | 5/5     | 4/4    | 5/5     | 3/3    | 7/7     | 8/8     | 2/2    | 4/4    | 5/5     | 1/1     | 6/6     | 6/6    | 3/3     | 3/3    | 2/2     | 4/4     | 2/2   | 5/5   | 9/9     | 7/7     | 1/1     | 9/9   | 0/0 |     |
| 1  | <i>Shewanella putrefaciens</i> 200                                       | 100     | 6/6     | 4/4    | 5/5     | 3/3    | 7/7     | 7/7     | 2/2    | 4/4    | 5/5     | 1/1     | 6/6     | 5/5    | 3/3     | 3/3    | 2/2     | 4/4     | 2/2   | 5/5   | 9/9     | 7/7     | 1/1     | 9/9   | 0/0 |     |
| 1  | ACAM 591                                                                 | 96/96   | 6/6     | 4/4    | 5/5     | 4/4    | 8/8     | 8/8     | 2/2    | 4/4    | 5/5     | 1/1     | 6/6     | 6/6    | 2/2     | 3/3    | 2/2     | 5/5     | 2/2   | 3/3   | 7/7     | 6/6     | 1/1     | 8/8   | 0/0 |     |
| 1  | <i>Shewanella frigidimarina</i> NCMB 400                                 | 125     | 10/10   | 4/4    | 7/7     | 7/7    | 11/11   | 2/2     | 8/8    | 5/5    | 1/1     | 8/8     | 9/9     | 3/3    | 3/3     | 2/2    | 4/4     | 2/2     | 4/4   | 14/14 | 8/8     | 1/1     | 9/9     | 0/0   |     |     |
| 1  | <i>Shewanella bacterium</i> DSS12                                        | 125     | 10/10   | 4/4    | 7/7     | 7/7    | 11/11   | 2/2     | 8/8    | 5/5    | 1/1     | 8/8     | 9/9     | 3/3    | 3/3     | 2/2    | 4/4     | 2/2     | 4/4   | 14/14 | 8/8     | 1/1     | 9/9     | 0/0   |     |     |
| 1  | ATCC 700329                                                              | 101     | 4/4     | 4/4    | 5/5     | 3/3    | 7/7     | 8/8     | 2/2    | 4/4    | 8/8     | 2/2     | 5/5     | 6/6    | 2/2     | 3/3    | 2/2     | 5/5     | 2/2   | 4/4   | 9/9     | 7/7     | 1/1     | 7/7   | 0/0 |     |
| 1  | <i>Shewanella onnezensis</i> SB2B                                        | 101     | 4/4     | 4/4    | 5/5     | 3/3    | 7/7     | 8/8     | 2/2    | 4/4    | 8/8     | 2/2     | 5/5     | 6/6    | 2/2     | 3/3    | 2/2     | 5/5     | 2/2   | 4/4   | 9/9     | 7/7     | 1/1     | 7/7   | 0/0 |     |
| 1  | <i>Shewanella</i> sp. MR-4                                               | 101     | 5/5     | 4/4    | 5/5     | 2/2    | 7/7     | 8/8     | 2/2    | 4/4    | 4/4     | 1/1     | 6/6     | 7/7    | 3/3     | 3/3    | 2/2     | 4/4     | 2/2   | 5/5   | 9/9     | 7/7     | 1/1     | 9/9   | 0/0 |     |
| 1  | <i>Shewanella</i> sp. MR-7                                               | 103     | 5/5     | 4/4    | 5/5     | 3/3    | 7/7     | 8/8     | 2/2    | 4/4    | 5/5     | 1/1     | 6/6     | 7/7    | 3/3     | 3/3    | 2/2     | 4/4     | 2/2   | 5/5   | 9/9     | 7/7     | 1/1     | 9/9   | 0/0 |     |
| 1  | ATCC 51908                                                               | 124     | 7/7     | 7/7    | 9/9     | 3/3    | 7/7     | 12/12   | 2/2    | 4/5    | 5/5     | 1/1     | 8/8     | 9/9    | 3/3     | 4/4    | 3/3     | 4/4     | 2/2   | 4/4   | 11/11   | 11/11   | 1/1     | 9/9   | 0/0 |     |
| 1  | <i>Shewanella woodyi</i> ATCC 51908                                      | 124     | 7/7     | 7/7    | 9/9     | 3/3    | 7/7     | 12/12   | 2/2    | 4/5    | 5/5     | 1/1     | 8/8     | 9/9    | 3/3     | 4/4    | 3/3     | 4/4     | 2/2   | 4/4   | 11/11   | 11/11   | 1/1     | 9/9   | 0/0 |     |
| 7  | CCUG 39356                                                               | 72/72   | 44/44   | 28/28  | 31/31   | 21/21  | 47/47   | 53/53   | 14/14  | 14/14  | 27/27   | 35/35   | 77/77   | 40/40  | 49/49   | 21/21  | 21      |         |       |       |         |         |         |       |     |     |













Table with columns for taxonomic groups and a large grid of numerical values representing data points for various studies or conditions. The groups listed include Rickettsia, Anaplasmataceae, Ehrlichia, Wolbachia, and various bacterial families.



















|  |  | 1 |  | 2 |  | 3 |  | 4 |  | 5 |  | 6 |  | 7 |  | 8 |  | 9 |  | 10 |  | 11 |  | 12 |  | 13 |  | 14 |  | 15 |  | 16 |  | 17 |  | 18 |  | 19 |  | 20 |  | 21 |  | 22 |  | 23 |  | 24 |  | 25 |  | 26 |  | 27 |  | 28 |  | 29 |  | 30 |  | 31 |  | 32 |  | 33 |  | 34 |  | 35 |  | 36 |  | 37 |  | 38 |  | 39 |  | 40 |  | 41 |  | 42 |  | 43 |  | 44 |  | 45 |  | 46 |  | 47 |  | 48 |  | 49 |  | 50 |  | 51 |  | 52 |  | 53 |  | 54 |  | 55 |  | 56 |  | 57 |  | 58 |  | 59 |  | 60 |  | 61 |  | 62 |  | 63 |  | 64 |  | 65 |  | 66 |  | 67 |  | 68 |  | 69 |  | 70 |  | 71 |  | 72 |  | 73 |  | 74 |  | 75 |  | 76 |  | 77 |  | 78 |  | 79 |  | 80 |  | 81 |  | 82 |  | 83 |  | 84 |  | 85 |  | 86 |  | 87 |  | 88 |  | 89 |  | 90 |  | 91 |  | 92 |  | 93 |  | 94 |  | 95 |  | 96 |  | 97 |  | 98 |  | 99 |  | 100 |  | 101 |  | 102 |  | 103 |  | 104 |  | 105 |  | 106 |  | 107 |  | 108 |  | 109 |  | 110 |  | 111 |  | 112 |  | 113 |  | 114 |  | 115 |  | 116 |  | 117 |  | 118 |  | 119 |  | 120 |  | 121 |  | 122 |  | 123 |  | 124 |  | 125 |  | 126 |  | 127 |  | 128 |  | 129 |  | 130 |  | 131 |  | 132 |  | 133 |  | 134 |  | 135 |  | 136 |  | 137 |  | 138 |  | 139 |  | 140 |  | 141 |  | 142 |  | 143 |  | 144 |  | 145 |  | 146 |  | 147 |  | 148 |  | 149 |  | 150 |  | 151 |  | 152 |  | 153 |  | 154 |  | 155 |  | 156 |  | 157 |  | 158 |  | 159 |  | 160 |  | 161 |  | 162 |  | 163 |  | 164 |  | 165 |  | 166 |  | 167 |  | 168 |  | 169 |  | 170 |  | 171 |  | 172 |  | 173 |  | 174 |  | 175 |  | 176 |  | 177 |  | 178 |  | 179 |  | 180 |  | 181 |  | 182 |  | 183 |  | 184 |  | 185 |  | 186 |  | 187 |  | 188 |  | 189 |  | 190 |  | 191 |  | 192 |  | 193 |  | 194 |  | 195 |  | 196 |  | 197 |  | 198 |  | 199 |  | 200 |  | 201 |  | 202 |  | 203 |  | 204 |  | 205 |  | 206 |  | 207 |  | 208 |  | 209 |  | 210 |  | 211 |  | 212 |  | 213 |  | 214 |  | 215 |  | 216 |  | 217 |  | 218 |  | 219 |  | 220 |  | 221 |  | 222 |  | 223 |  | 224 |  | 225 |  | 226 |  | 227 |  | 228 |  | 229 |  | 230 |  | 231 |  | 232 |  | 233 |  | 234 |  | 235 |  | 236 |  | 237 |  | 238 |  | 239 |  | 240 |  | 241 |  | 242 |  | 243 |  | 244 |  | 245 |  | 246 |  | 247 |  | 248 |  | 249 |  | 250 |  | 251 |  | 252 |  | 253 |  | 254 |  | 255 |  | 256 |  | 257 |  | 258 |  | 259 |  | 260 |  | 261 |  | 262 |  | 263 |  | 264 |  | 265 |  | 266 |  | 267 |  | 268 |  | 269 |  | 270 |  | 271 |  | 272 |  | 273 |  | 274 |  | 275 |  | 276 |  | 277 |  | 278 |  | 279 |  | 280 |  | 281 |  | 282 |  | 283 |  | 284 |  | 285 |  | 286 |  | 287 |  | 288 |  | 289 |  | 290 |  | 291 |  | 292 |  | 293 |  | 294 |  | 295 |  | 296 |  | 297 |  | 298 |  | 299 |  | 300 |  | 301 |  | 302 |  | 303 |  | 304 |  | 305 |  | 306 |  | 307 |  | 308 |  | 309 |  | 310 |  | 311 |  | 312 |  | 313 |  | 314 |  | 315 |  | 316 |  | 317 |  | 318 |  | 319 |  | 320 |  | 321 |  | 322 |  | 323 |  | 324 |  | 325 |  | 326 |  | 327 |  | 328 |  | 329 |  | 330 |  | 331 |  | 332 |  | 333 |  | 334 |  | 335 |  | 336 |  | 337 |  | 338 |  | 339 |  | 340 |  | 341 |  | 342 |  | 343 |  | 344 |  | 345 |  | 346 |  | 347 |  | 348 |  | 349 |  | 350 |  | 351 |  | 352 |  | 353 |  | 354 |  | 355 |  | 356 |  | 357 |  | 358 |  | 359 |  | 360 |  | 361 |  | 362 |  | 363 |  | 364 |  | 365 |  | 366 |  | 367 |  | 368 |  | 369 |  | 370 |  | 371 |  | 372 |  | 373 |  | 374 |  | 375 |  | 376 |  | 377 |  | 378 |  | 379 |  | 380 |  | 381 |  | 382 |  | 383 |  | 384 |  | 385 |  | 386 |  | 387 |  | 388 |  | 389 |  | 390 |  | 391 |  | 392 |  | 393 |  | 394 |  | 395 |  | 396 |  | 397 |  | 398 |  | 399 |  | 400 |  | 401 |  | 402 |  | 403 |  | 404 |  | 405 |  | 406 |  | 407 |  | 408 |  | 409 |  | 410 |  | 411 |  | 412 |  | 413 |  | 414 |  | 415 |  | 416 |  | 417 |  | 418 |  | 419 |  | 420 |  | 421 |  | 422 |  | 423 |  | 424 |  | 425 |  | 426 |  | 427 |  | 428 |  | 429 |  | 430 |  | 431 |  | 432 |  | 433 |  | 434 |  | 435 |  | 436 |  | 437 |  | 438 |  | 439 |  | 440 |  | 441 |  | 442 |  | 443 |  | 444 |  | 445 |  | 446 |  | 447 |  | 448 |  | 449 |  | 450 |  | 451 |  | 452 |  | 453 |  | 454 |  | 455 |  | 456 |  | 457 |  | 458 |  | 459 |  | 460 |  | 461 |  | 462 |  | 463 |  | 464 |  | 465 |  | 466 |  | 467 |  | 468 |  | 469 |  | 470 |  | 471 |  | 472 |  | 473 |  | 474 |  | 475 |  | 476 |  | 477 |  | 478 |  | 479 |  | 480 |  | 481 |  | 482 |  | 483 |  | 484 |  | 485 |  | 486 |  | 487 |  | 488 |  | 489 |  | 490 |  | 491 |  | 492 |  | 493 |  | 494 |  | 495 |  | 496 |  | 497 |  | 498 |  | 499 |  | 500 |  | 501 |  | 502 |  | 503 |  | 504 |  | 505 |  | 506 |  | 507 |  | 508 |  | 509 |  | 510 |  | 511 |  | 512 |  | 513 |  | 514 |  | 515 |  | 516 |  | 517 |  | 518 |  | 519 |  | 520 |  | 521 |  | 522 |  | 523 |  | 524 |  | 525 |  | 526 |  | 527 |  | 528 |  | 529 |  | 530 |  | 531 |  | 532 |  | 533 |  | 534 |  | 535 |  | 536 |  | 537 |  | 538 |  | 539 |  | 540 |  | 541 |  | 542 |  | 543 |  | 544 |  | 545 |  | 546 |  | 547 |  | 548 |  | 549 |  | 550 |  | 551 |  | 552 |  | 553 |  | 554 |  | 555 |  | 556 |  | 557 |  | 558 |  | 559 |  | 560 |  | 561 |  | 562 |  | 563 |  | 564 |  | 565 |  | 566 |  | 567 |  | 568 |  | 569 |  | 570 |  | 571 |  | 572 |  | 573 |  | 574 |  | 575 |  | 576 |  | 577 |  | 578 |  | 579 |  | 580 |  | 581 |  | 582 |  | 583 |  | 584 |  | 585 |  | 586 |  | 587 |  | 588 |  | 589 |  | 590 |  | 591 |  | 592 |  | 593 |  | 594 |  | 595 |  | 596 |  | 597 |  | 598 |  | 599 |  | 600 |  | 601 |  | 602 |  | 603 |  | 604 |  | 605 |  | 606 |  | 607 |  | 608 |  | 609 |  | 610 |  | 611 |  | 612 |  | 613 |  | 614 |  | 615 |  | 616 |  | 617 |  | 618 |  | 619 |  | 620 |  | 621 |  | 622 |  | 623 |  | 624 |  | 625 |  | 626 |  | 627 |  | 628 |  | 629 |  | 630 |  | 631 |  | 632 |  | 633 |  | 634 |  | 635 |  | 636 |  | 637 |  | 638 |  | 639 |  | 640 |  | 641 |  | 642 |  | 643 |  | 644 |  | 645 |  | 646 |  | 647 |  | 648 |  | 649 |  | 650 |  | 651 |  | 652 |  | 653 |  | 654 |  | 655 |  | 656 |  | 657 |  | 658 |  | 659 |  | 660 |  | 661 |  | 662 |  | 663 |  | 664 |  | 665 |  | 666 |  | 667 |  | 668 |  | 669 |  | 670 |  | 671 |  | 672 |  | 673 |  | 674 |  | 675 |  | 676 |  | 677 |  | 678 |  | 679 |  | 680 |  | 681 |  | 682 |  | 683 |  | 684 |  | 685 |  | 686 |  | 687 |  | 688 |  | 689 |  | 690 |  | 691 |  | 692 |  | 693 |  | 694 |  | 695 |  | 696 |  | 697 |  | 698 |  | 699 |  | 700 |  | 701 |  | 702 |  | 703 |  | 704 |  | 705 |  | 706 |  | 707 |  | 708 |  | 709 |  | 710 |  | 711 |  | 712 |  | 713 |  | 714 |  | 715 |  | 716 |  | 717 |  | 718 |  | 719 |  | 720 |  | 721 |  | 722 |  | 723 |  | 724 |  | 725 |  | 726 |  | 727 |  | 728 |  | 729 |  | 730 |  | 731 |  | 732 |  | 733 |  | 734 |  | 735 |  | 736 |  | 737 |  | 738 |  | 739 |  | 740 |  | 741 |  | 742 |  | 743 |  | 744 |  | 745 |  | 746 |  | 747 |  | 748 |  | 749 |  | 750 |  | 751 |  | 752 |  | 753 |  | 754 |  | 755 |  | 756 |  | 757 |  | 758 |  | 759 |  | 760 |  | 761 |  | 762 |  | 763 |  | 764 |  | 765 |  | 766 |  | 767 |  | 768 |  | 769 |  | 770 |  | 771 |  | 772 |  | 773 |  | 774 |  | 775 |  | 776 |  | 777 |  | 778 |  | 779 |  | 780 |  | 781 |  | 782 |  | 783 |  | 784 |  | 785 |  | 786 |  | 787 |  | 788 |  | 789 |  | 790 |  | 791 |  | 792 |  | 793 |  | 794 |  | 795 |  | 796 |  | 797 |  | 798 |  | 799 |  | 800 |  | 801 |  | 802 |  | 803 |  | 804 |  | 805 |  | 806 |  | 807 |  | 808 |  | 809 |  | 810 |  | 811 |  | 812 |  | 813 |  | 814 |  | 815 |  | 816 |  | 817 |  | 818 |  | 819 |  | 820 |  | 821 |  | 822 |  | 823 |  | 824 |  | 825 |  | 826 |  | 827 |  | 828 |  | 829 |  | 830 |  | 831 |  | 832 |  | 833 |  | 834 |  | 835 |  | 836 |  | 837 |  | 838 |  | 839 |  | 840 |  | 841 |  | 842 |  | 843 |  | 844 |  | 845 |  | 846 |  | 847 |  | 848 |  | 849 |  | 850 |  | 851 |  | 852 |  | 853 |  | 854 |  | 855 |  | 856 |  | 857 |  | 858 |  | 859 |  | 860 |  | 861 |  | 862 |  | 863 |  | 864 |  | 865 |  | 866 |  | 867 |  | 868 |  | 869 |  | 870 |  | 871 |  | 872 |  | 873 |  | 874 |  | 875 |  | 876 |  | 877 |  | 878 |  | 879 |  | 880 |  | 881 |  | 882 |  | 883 |  | 884 |  | 885 |  | 886 |  | 887 |  | 888 |  | 889 |  | 890 |  | 891 |  | 892 |  | 893 |  | 894 |  | 895 |  | 896 |  | 897 |  | 898 |  | 899 |  | 900 |  | 901 |  | 902 |  | 903 |  | 904 |  | 905 |  | 906 |  | 907 |  | 908 |  | 909 |  | 910 |  | 911 |  | 912 |  | 913 |  | 914 |  | 915 |  | 916 |  | 917 |  | 918 |  | 919 |  | 920 |  | 921 |  | 922 |  | 923 |  | 924 |  | 925 |  | 926 |  | 927 |  | 928 |  | 929 |  | 930 |  | 931 |  | 932 |  | 933 |  | 934 |  | 935 |  | 936 |  | 937 |  | 938 |  | 939 |  | 940 |  | 941 |  | 942 |  | 943 |  | 944 |  | 945 |  | 946 |  | 947 |  | 948 |  | 949 |  | 950 |  | 951 |  | 952 |  | 953 |  | 954 |  | 955 |  | 956 |  | 957 |  | 958 |  | 959 |  | 960 |  | 961 |  | 962 |  | 963 |  | 964 |  | 965 |  | 966 |  | 967 |  | 968 |  | 969 |  | 970 |  | 971 |  | 972 |  | 973 |  | 974 |  | 975 |  | 976 |  | 977 |  | 978 |  | 979 |  | 980 |  | 981 |  | 982 |  | 983 |  | 984 |  | 985 |  | 986 |  | 987 |  | 988 |  | 989 |  | 990 |  | 991 |  | 992 |  | 993 |  | 994 |  | 995 |  | 996 |  | 997 |  | 998 |  | 999 |  | 1000 |  | 1001 |  | 1002 |  | 1003 |  | 1004 |  | 1005 |  | 1006 |  | 1007 |  | 1008 |  | 1009 |  | 1010 |  | 1011 |  | 1012 |  | 1013 |  | 1014 |  | 1015 |  | 1016 |  | 1017 |  | 1018 |  | 1019 |  | 1020 |  | 1021 |  | 1022 |  | 1023 |  | 1024 |  | 1025 |  | 1026 |  | 1027 |  | 1028 |  | 1029 |  | 1030 |  | 1031 |  | 1032 |  | 1033 |  | 1034 |  | 1035 |  | 1036 |  | 1037 |  | 1038 |  | 1039 |  | 1040 |  | 1041 |  | 1042 |  | 1043 |  | 1044 |  | 1045 |  | 1046 |  | 1047 |  | 1048 |  | 1049 |  | 1050 |  | 1051 |  | 1052 |  | 1053 |  | 1054 |  | 1055 |  | 1056 |  | 1057 |  | 1058 |  | 1059 |  | 1060 |  | 1061 |  | 1062 |  | 1063 |  | 1064 |  | 1065 |  | 1066 |  | 1067 |  | 1068 |  | 1069 |  | 1070 |  | 1071 |  | 1072 |  | 1073 |  | 1074 |  | 1075 |  | 1076 |  | 1077 |  | 1078 |  | 1079 |  | 1080 |  | 1081 |  | 1082 |  | 1083 |  | 1084 |  | 1085 |  | 1086 |  | 1087 |  | 1088 |  | 1089 |  | 1090 |  | 1091 |  | 1092 |  | 1093 |  | 1094 |  | 1095 |  | 1096 |  | 1097 |  | 1098 |  | 1099 |  | 1100 |  | 1101 |  | 1102 |  | 1103 |  | 1104 |  | 1105 |  | 1106 |  | 1107 |  | 1108 |  | 1109 |  | 1110 |  | 1111 |  | 1112 |  | 1113 |  | 1114 |  | 1115 |  | 1116 |  | 1117 |  | 1118 |  | 1119 |  | 1120 |  | 11 |  |
|--|--|---|--|---|--|---|--|---|--|---|--|---|--|---|--|---|--|---|--|----|--|----|--|----|--|----|--|----|--|----|--|----|--|----|--|----|--|----|--|----|--|----|--|----|--|----|--|----|--|----|--|----|--|----|--|----|--|----|--|----|--|----|--|----|--|----|--|----|--|----|--|----|--|----|--|----|--|----|--|----|--|----|--|----|--|----|--|----|--|----|--|----|--|----|--|----|--|----|--|----|--|----|--|----|--|----|--|----|--|----|--|----|--|----|--|----|--|----|--|----|--|----|--|----|--|----|--|----|--|----|--|----|--|----|--|----|--|----|--|----|--|----|--|----|--|----|--|----|--|----|--|----|--|----|--|----|--|----|--|----|--|----|--|----|--|----|--|----|--|----|--|----|--|----|--|----|--|----|--|----|--|----|--|----|--|----|--|----|--|----|--|----|--|----|--|----|--|----|--|-----|--|-----|--|-----|--|-----|--|-----|--|-----|--|-----|--|-----|--|-----|--|-----|--|-----|--|-----|--|-----|--|-----|--|-----|--|-----|--|-----|--|-----|--|-----|--|-----|--|-----|--|-----|--|-----|--|-----|--|-----|--|-----|--|-----|--|-----|--|-----|--|-----|--|-----|--|-----|--|-----|--|-----|--|-----|--|-----|--|-----|--|-----|--|-----|--|-----|--|-----|--|-----|--|-----|--|-----|--|-----|--|-----|--|-----|--|-----|--|-----|--|-----|--|-----|--|-----|--|-----|--|-----|--|-----|--|-----|--|-----|--|-----|--|-----|--|-----|--|-----|--|-----|--|-----|--|-----|--|-----|--|-----|--|-----|--|-----|--|-----|--|-----|--|-----|--|-----|--|-----|--|-----|--|-----|--|-----|--|-----|--|-----|--|-----|--|-----|--|-----|--|-----|--|-----|--|-----|--|-----|--|-----|--|-----|--|-----|--|-----|--|-----|--|-----|--|-----|--|-----|--|-----|--|-----|--|-----|--|-----|--|-----|--|-----|--|-----|--|-----|--|-----|--|-----|--|-----|--|-----|--|-----|--|-----|--|-----|--|-----|--|-----|--|-----|--|-----|--|-----|--|-----|--|-----|--|-----|--|-----|--|-----|--|-----|--|-----|--|-----|--|-----|--|-----|--|-----|--|-----|--|-----|--|-----|--|-----|--|-----|--|-----|--|-----|--|-----|--|-----|--|-----|--|-----|--|-----|--|-----|--|-----|--|-----|--|-----|--|-----|--|-----|--|-----|--|-----|--|-----|--|-----|--|-----|--|-----|--|-----|--|-----|--|-----|--|-----|--|-----|--|-----|--|-----|--|-----|--|-----|--|-----|--|-----|--|-----|--|-----|--|-----|--|-----|--|-----|--|-----|--|-----|--|-----|--|-----|--|-----|--|-----|--|-----|--|-----|--|-----|--|-----|--|-----|--|-----|--|-----|--|-----|--|-----|--|-----|--|-----|--|-----|--|-----|--|-----|--|-----|--|-----|--|-----|--|-----|--|-----|--|-----|--|-----|--|-----|--|-----|--|-----|--|-----|--|-----|--|-----|--|-----|--|-----|--|-----|--|-----|--|-----|--|-----|--|-----|--|-----|--|-----|--|-----|--|-----|--|-----|--|-----|--|-----|--|-----|--|-----|--|-----|--|-----|--|-----|--|-----|--|-----|--|-----|--|-----|--|-----|--|-----|--|-----|--|-----|--|-----|--|-----|--|-----|--|-----|--|-----|--|-----|--|-----|--|-----|--|-----|--|-----|--|-----|--|-----|--|-----|--|-----|--|-----|--|-----|--|-----|--|-----|--|-----|--|-----|--|-----|--|-----|--|-----|--|-----|--|-----|--|-----|--|-----|--|-----|--|-----|--|-----|--|-----|--|-----|--|-----|--|-----|--|-----|--|-----|--|-----|--|-----|--|-----|--|-----|--|-----|--|-----|--|-----|--|-----|--|-----|--|-----|--|-----|--|-----|--|-----|--|-----|--|-----|--|-----|--|-----|--|-----|--|-----|--|-----|--|-----|--|-----|--|-----|--|-----|--|-----|--|-----|--|-----|--|-----|--|-----|--|-----|--|-----|--|-----|--|-----|--|-----|--|-----|--|-----|--|-----|--|-----|--|-----|--|-----|--|-----|--|-----|--|-----|--|-----|--|-----|--|-----|--|-----|--|-----|--|-----|--|-----|--|-----|--|-----|--|-----|--|-----|--|-----|--|-----|--|-----|--|-----|--|-----|--|-----|--|-----|--|-----|--|-----|--|-----|--|-----|--|-----|--|-----|--|-----|--|-----|--|-----|--|-----|--|-----|--|-----|--|-----|--|-----|--|-----|--|-----|--|-----|--|-----|--|-----|--|-----|--|-----|--|-----|--|-----|--|-----|--|-----|--|-----|--|-----|--|-----|--|-----|--|-----|--|-----|--|-----|--|-----|--|-----|--|-----|--|-----|--|-----|--|-----|--|-----|--|-----|--|-----|--|-----|--|-----|--|-----|--|-----|--|-----|--|-----|--|-----|--|-----|--|-----|--|-----|--|-----|--|-----|--|-----|--|-----|--|-----|--|-----|--|-----|--|-----|--|-----|--|-----|--|-----|--|-----|--|-----|--|-----|--|-----|--|-----|--|-----|--|-----|--|-----|--|-----|--|-----|--|-----|--|-----|--|-----|--|-----|--|-----|--|-----|--|-----|--|-----|--|-----|--|-----|--|-----|--|-----|--|-----|--|-----|--|-----|--|-----|--|-----|--|-----|--|-----|--|-----|--|-----|--|-----|--|-----|--|-----|--|-----|--|-----|--|-----|--|-----|--|-----|--|-----|--|-----|--|-----|--|-----|--|-----|--|-----|--|-----|--|-----|--|-----|--|-----|--|-----|--|-----|--|-----|--|-----|--|-----|--|-----|--|-----|--|-----|--|-----|--|-----|--|-----|--|-----|--|-----|--|-----|--|-----|--|-----|--|-----|--|-----|--|-----|--|-----|--|-----|--|-----|--|-----|--|-----|--|-----|--|-----|--|-----|--|-----|--|-----|--|-----|--|-----|--|-----|--|-----|--|-----|--|-----|--|-----|--|-----|--|-----|--|-----|--|-----|--|-----|--|-----|--|-----|--|-----|--|-----|--|-----|--|-----|--|-----|--|-----|--|-----|--|-----|--|-----|--|-----|--|-----|--|-----|--|-----|--|-----|--|-----|--|-----|--|-----|--|-----|--|-----|--|-----|--|-----|--|-----|--|-----|--|-----|--|-----|--|-----|--|-----|--|-----|--|-----|--|-----|--|-----|--|-----|--|-----|--|-----|--|-----|--|-----|--|-----|--|-----|--|-----|--|-----|--|-----|--|-----|--|-----|--|-----|--|-----|--|-----|--|-----|--|-----|--|-----|--|-----|--|-----|--|-----|--|-----|--|-----|--|-----|--|-----|--|-----|--|-----|--|-----|--|-----|--|-----|--|-----|--|-----|--|-----|--|-----|--|-----|--|-----|--|-----|--|-----|--|-----|--|-----|--|-----|--|-----|--|-----|--|-----|--|-----|--|-----|--|-----|--|-----|--|-----|--|-----|--|-----|--|-----|--|-----|--|-----|--|-----|--|-----|--|-----|--|-----|--|-----|--|-----|--|-----|--|-----|--|-----|--|-----|--|-----|--|-----|--|-----|--|-----|--|-----|--|-----|--|-----|--|-----|--|-----|--|-----|--|-----|--|-----|--|-----|--|-----|--|-----|--|-----|--|-----|--|-----|--|-----|--|-----|--|-----|--|-----|--|-----|--|-----|--|-----|--|-----|--|-----|--|-----|--|-----|--|-----|--|-----|--|-----|--|-----|--|-----|--|-----|--|-----|--|-----|--|-----|--|-----|--|-----|--|-----|--|-----|--|-----|--|-----|--|-----|--|-----|--|-----|--|-----|--|-----|--|-----|--|-----|--|-----|--|-----|--|-----|--|-----|--|-----|--|-----|--|-----|--|-----|--|-----|--|-----|--|-----|--|-----|--|-----|--|-----|--|-----|--|-----|--|-----|--|-----|--|-----|--|-----|--|-----|--|-----|--|-----|--|-----|--|-----|--|-----|--|-----|--|-----|--|-----|--|-----|--|-----|--|-----|--|-----|--|-----|--|-----|--|-----|--|-----|--|-----|--|-----|--|-----|--|-----|--|-----|--|-----|--|-----|--|-----|--|-----|--|-----|--|-----|--|-----|--|-----|--|-----|--|-----|--|-----|--|-----|--|-----|--|-----|--|-----|--|-----|--|-----|--|-----|--|-----|--|-----|--|-----|--|-----|--|-----|--|-----|--|-----|--|-----|--|-----|--|-----|--|-----|--|-----|--|-----|--|-----|--|-----|--|-----|--|-----|--|-----|--|-----|--|-----|--|-----|--|-----|--|-----|--|-----|--|-----|--|-----|--|-----|--|-----|--|-----|--|-----|--|-----|--|-----|--|-----|--|-----|--|-----|--|-----|--|-----|--|-----|--|-----|--|-----|--|-----|--|-----|--|-----|--|-----|--|-----|--|-----|--|-----|--|-----|--|-----|--|-----|--|-----|--|-----|--|-----|--|-----|--|-----|--|-----|--|-----|--|-----|--|-----|--|-----|--|-----|--|-----|--|-----|--|-----|--|-----|--|-----|--|-----|--|-----|--|-----|--|-----|--|-----|--|-----|--|-----|--|-----|--|-----|--|-----|--|-----|--|-----|--|-----|--|-----|--|-----|--|-----|--|-----|--|-----|--|-----|--|-----|--|-----|--|-----|--|-----|--|-----|--|-----|--|-----|--|-----|--|-----|--|-----|--|-----|--|-----|--|-----|--|-----|--|-----|--|-----|--|-----|--|-----|--|-----|--|-----|--|-----|--|-----|--|-----|--|-----|--|-----|--|-----|--|-----|--|-----|--|-----|--|-----|--|-----|--|-----|--|-----|--|-----|--|-----|--|-----|--|-----|--|-----|--|-----|--|-----|--|-----|--|-----|--|-----|--|-----|--|-----|--|-----|--|-----|--|-----|--|-----|--|-----|--|-----|--|-----|--|-----|--|-----|--|-----|--|-----|--|-----|--|-----|--|-----|--|-----|--|-----|--|-----|--|-----|--|-----|--|-----|--|-----|--|-----|--|-----|--|-----|--|-----|--|-----|--|-----|--|-----|--|-----|--|-----|--|-----|--|-----|--|-----|--|-----|--|-----|--|-----|--|-----|--|-----|--|-----|--|-----|--|-----|--|-----|--|-----|--|-----|--|-----|--|-----|--|-----|--|-----|--|-----|--|-----|--|-----|--|-----|--|-----|--|-----|--|-----|--|-----|--|-----|--|-----|--|-----|--|-----|--|-----|--|-----|--|-----|--|-----|--|-----|--|-----|--|-----|--|-----|--|-----|--|-----|--|-----|--|-----|--|-----|--|-----|--|-----|--|-----|--|-----|--|-----|--|-----|--|-----|--|-----|--|-----|--|-----|--|-----|--|-----|--|-----|--|-----|--|-----|--|-----|--|------|--|------|--|------|--|------|--|------|--|------|--|------|--|------|--|------|--|------|--|------|--|------|--|------|--|------|--|------|--|------|--|------|--|------|--|------|--|------|--|------|--|------|--|------|--|------|--|------|--|------|--|------|--|------|--|------|--|------|--|------|--|------|--|------|--|------|--|------|--|------|--|------|--|------|--|------|--|------|--|------|--|------|--|------|--|------|--|------|--|------|--|------|--|------|--|------|--|------|--|------|--|------|--|------|--|------|--|------|--|------|--|------|--|------|--|------|--|------|--|------|--|------|--|------|--|------|--|------|--|------|--|------|--|------|--|------|--|------|--|------|--|------|--|------|--|------|--|------|--|------|--|------|--|------|--|------|--|------|--|------|--|------|--|------|--|------|--|------|--|------|--|------|--|------|--|------|--|------|--|------|--|------|--|------|--|------|--|------|--|------|--|------|--|------|--|------|--|------|--|------|--|------|--|------|--|------|--|------|--|------|--|------|--|------|--|------|--|------|--|------|--|------|--|------|--|------|--|------|--|------|--|------|--|------|--|------|--|------|--|------|--|----|--|
|--|--|---|--|---|--|---|--|---|--|---|--|---|--|---|--|---|--|---|--|----|--|----|--|----|--|----|--|----|--|----|--|----|--|----|--|----|--|----|--|----|--|----|--|----|--|----|--|----|--|----|--|----|--|----|--|----|--|----|--|----|--|----|--|----|--|----|--|----|--|----|--|----|--|----|--|----|--|----|--|----|--|----|--|----|--|----|--|----|--|----|--|----|--|----|--|----|--|----|--|----|--|----|--|----|--|----|--|----|--|----|--|----|--|----|--|----|--|----|--|----|--|----|--|----|--|----|--|----|--|----|--|----|--|----|--|----|--|----|--|----|--|----|--|----|--|----|--|----|--|----|--|----|--|----|--|----|--|----|--|----|--|----|--|----|--|----|--|----|--|----|--|----|--|----|--|----|--|----|--|----|--|----|--|----|--|----|--|----|--|----|--|----|--|----|--|----|--|----|--|-----|--|-----|--|-----|--|-----|--|-----|--|-----|--|-----|--|-----|--|-----|--|-----|--|-----|--|-----|--|-----|--|-----|--|-----|--|-----|--|-----|--|-----|--|-----|--|-----|--|-----|--|-----|--|-----|--|-----|--|-----|--|-----|--|-----|--|-----|--|-----|--|-----|--|-----|--|-----|--|-----|--|-----|--|-----|--|-----|--|-----|--|-----|--|-----|--|-----|--|-----|--|-----|--|-----|--|-----|--|-----|--|-----|--|-----|--|-----|--|-----|--|-----|--|-----|--|-----|--|-----|--|-----|--|-----|--|-----|--|-----|--|-----|--|-----|--|-----|--|-----|--|-----|--|-----|--|-----|--|-----|--|-----|--|-----|--|-----|--|-----|--|-----|--|-----|--|-----|--|-----|--|-----|--|-----|--|-----|--|-----|--|-----|--|-----|--|-----|--|-----|--|-----|--|-----|--|-----|--|-----|--|-----|--|-----|--|-----|--|-----|--|-----|--|-----|--|-----|--|-----|--|-----|--|-----|--|-----|--|-----|--|-----|--|-----|--|-----|--|-----|--|-----|--|-----|--|-----|--|-----|--|-----|--|-----|--|-----|--|-----|--|-----|--|-----|--|-----|--|-----|--|-----|--|-----|--|-----|--|-----|--|-----|--|-----|--|-----|--|-----|--|-----|--|-----|--|-----|--|-----|--|-----|--|-----|--|-----|--|-----|--|-----|--|-----|--|-----|--|-----|--|-----|--|-----|--|-----|--|-----|--|-----|--|-----|--|-----|--|-----|--|-----|--|-----|--|-----|--|-----|--|-----|--|-----|--|-----|--|-----|--|-----|--|-----|--|-----|--|-----|--|-----|--|-----|--|-----|--|-----|--|-----|--|-----|--|-----|--|-----|--|-----|--|-----|--|-----|--|-----|--|-----|--|-----|--|-----|--|-----|--|-----|--|-----|--|-----|--|-----|--|-----|--|-----|--|-----|--|-----|--|-----|--|-----|--|-----|--|-----|--|-----|--|-----|--|-----|--|-----|--|-----|--|-----|--|-----|--|-----|--|-----|--|-----|--|-----|--|-----|--|-----|--|-----|--|-----|--|-----|--|-----|--|-----|--|-----|--|-----|--|-----|--|-----|--|-----|--|-----|--|-----|--|-----|--|-----|--|-----|--|-----|--|-----|--|-----|--|-----|--|-----|--|-----|--|-----|--|-----|--|-----|--|-----|--|-----|--|-----|--|-----|--|-----|--|-----|--|-----|--|-----|--|-----|--|-----|--|-----|--|-----|--|-----|--|-----|--|-----|--|-----|--|-----|--|-----|--|-----|--|-----|--|-----|--|-----|--|-----|--|-----|--|-----|--|-----|--|-----|--|-----|--|-----|--|-----|--|-----|--|-----|--|-----|--|-----|--|-----|--|-----|--|-----|--|-----|--|-----|--|-----|--|-----|--|-----|--|-----|--|-----|--|-----|--|-----|--|-----|--|-----|--|-----|--|-----|--|-----|--|-----|--|-----|--|-----|--|-----|--|-----|--|-----|--|-----|--|-----|--|-----|--|-----|--|-----|--|-----|--|-----|--|-----|--|-----|--|-----|--|-----|--|-----|--|-----|--|-----|--|-----|--|-----|--|-----|--|-----|--|-----|--|-----|--|-----|--|-----|--|-----|--|-----|--|-----|--|-----|--|-----|--|-----|--|-----|--|-----|--|-----|--|-----|--|-----|--|-----|--|-----|--|-----|--|-----|--|-----|--|-----|--|-----|--|-----|--|-----|--|-----|--|-----|--|-----|--|-----|--|-----|--|-----|--|-----|--|-----|--|-----|--|-----|--|-----|--|-----|--|-----|--|-----|--|-----|--|-----|--|-----|--|-----|--|-----|--|-----|--|-----|--|-----|--|-----|--|-----|--|-----|--|-----|--|-----|--|-----|--|-----|--|-----|--|-----|--|-----|--|-----|--|-----|--|-----|--|-----|--|-----|--|-----|--|-----|--|-----|--|-----|--|-----|--|-----|--|-----|--|-----|--|-----|--|-----|--|-----|--|-----|--|-----|--|-----|--|-----|--|-----|--|-----|--|-----|--|-----|--|-----|--|-----|--|-----|--|-----|--|-----|--|-----|--|-----|--|-----|--|-----|--|-----|--|-----|--|-----|--|-----|--|-----|--|-----|--|-----|--|-----|--|-----|--|-----|--|-----|--|-----|--|-----|--|-----|--|-----|--|-----|--|-----|--|-----|--|-----|--|-----|--|-----|--|-----|--|-----|--|-----|--|-----|--|-----|--|-----|--|-----|--|-----|--|-----|--|-----|--|-----|--|-----|--|-----|--|-----|--|-----|--|-----|--|-----|--|-----|--|-----|--|-----|--|-----|--|-----|--|-----|--|-----|--|-----|--|-----|--|-----|--|-----|--|-----|--|-----|--|-----|--|-----|--|-----|--|-----|--|-----|--|-----|--|-----|--|-----|--|-----|--|-----|--|-----|--|-----|--|-----|--|-----|--|-----|--|-----|--|-----|--|-----|--|-----|--|-----|--|-----|--|-----|--|-----|--|-----|--|-----|--|-----|--|-----|--|-----|--|-----|--|-----|--|-----|--|-----|--|-----|--|-----|--|-----|--|-----|--|-----|--|-----|--|-----|--|-----|--|-----|--|-----|--|-----|--|-----|--|-----|--|-----|--|-----|--|-----|--|-----|--|-----|--|-----|--|-----|--|-----|--|-----|--|-----|--|-----|--|-----|--|-----|--|-----|--|-----|--|-----|--|-----|--|-----|--|-----|--|-----|--|-----|--|-----|--|-----|--|-----|--|-----|--|-----|--|-----|--|-----|--|-----|--|-----|--|-----|--|-----|--|-----|--|-----|--|-----|--|-----|--|-----|--|-----|--|-----|--|-----|--|-----|--|-----|--|-----|--|-----|--|-----|--|-----|--|-----|--|-----|--|-----|--|-----|--|-----|--|-----|--|-----|--|-----|--|-----|--|-----|--|-----|--|-----|--|-----|--|-----|--|-----|--|-----|--|-----|--|-----|--|-----|--|-----|--|-----|--|-----|--|-----|--|-----|--|-----|--|-----|--|-----|--|-----|--|-----|--|-----|--|-----|--|-----|--|-----|--|-----|--|-----|--|-----|--|-----|--|-----|--|-----|--|-----|--|-----|--|-----|--|-----|--|-----|--|-----|--|-----|--|-----|--|-----|--|-----|--|-----|--|-----|--|-----|--|-----|--|-----|--|-----|--|-----|--|-----|--|-----|--|-----|--|-----|--|-----|--|-----|--|-----|--|-----|--|-----|--|-----|--|-----|--|-----|--|-----|--|-----|--|-----|--|-----|--|-----|--|-----|--|-----|--|-----|--|-----|--|-----|--|-----|--|-----|--|-----|--|-----|--|-----|--|-----|--|-----|--|-----|--|-----|--|-----|--|-----|--|-----|--|-----|--|-----|--|-----|--|-----|--|-----|--|-----|--|-----|--|-----|--|-----|--|-----|--|-----|--|-----|--|-----|--|-----|--|-----|--|-----|--|-----|--|-----|--|-----|--|-----|--|-----|--|-----|--|-----|--|-----|--|-----|--|-----|--|-----|--|-----|--|-----|--|-----|--|-----|--|-----|--|-----|--|-----|--|-----|--|-----|--|-----|--|-----|--|-----|--|-----|--|-----|--|-----|--|-----|--|-----|--|-----|--|-----|--|-----|--|-----|--|-----|--|-----|--|-----|--|-----|--|-----|--|-----|--|-----|--|-----|--|-----|--|-----|--|-----|--|-----|--|-----|--|-----|--|-----|--|-----|--|-----|--|-----|--|-----|--|-----|--|-----|--|-----|--|-----|--|-----|--|-----|--|-----|--|-----|--|-----|--|-----|--|-----|--|-----|--|-----|--|-----|--|-----|--|-----|--|-----|--|-----|--|-----|--|-----|--|-----|--|-----|--|-----|--|-----|--|-----|--|-----|--|-----|--|-----|--|-----|--|-----|--|-----|--|-----|--|-----|--|-----|--|-----|--|-----|--|-----|--|-----|--|-----|--|-----|--|-----|--|-----|--|-----|--|-----|--|-----|--|-----|--|-----|--|-----|--|-----|--|-----|--|-----|--|-----|--|-----|--|-----|--|-----|--|-----|--|-----|--|-----|--|-----|--|-----|--|-----|--|-----|--|-----|--|-----|--|-----|--|-----|--|-----|--|-----|--|-----|--|-----|--|-----|--|-----|--|-----|--|-----|--|-----|--|-----|--|-----|--|-----|--|-----|--|-----|--|-----|--|-----|--|-----|--|-----|--|-----|--|-----|--|-----|--|-----|--|-----|--|-----|--|-----|--|-----|--|-----|--|-----|--|-----|--|-----|--|-----|--|-----|--|-----|--|-----|--|-----|--|-----|--|-----|--|-----|--|-----|--|-----|--|-----|--|-----|--|-----|--|-----|--|-----|--|-----|--|-----|--|-----|--|-----|--|-----|--|-----|--|-----|--|-----|--|-----|--|-----|--|-----|--|-----|--|-----|--|-----|--|-----|--|-----|--|-----|--|-----|--|-----|--|-----|--|-----|--|-----|--|-----|--|-----|--|-----|--|-----|--|-----|--|-----|--|-----|--|-----|--|-----|--|-----|--|-----|--|-----|--|-----|--|-----|--|-----|--|-----|--|-----|--|-----|--|-----|--|-----|--|-----|--|-----|--|-----|--|-----|--|-----|--|-----|--|-----|--|-----|--|-----|--|-----|--|-----|--|-----|--|-----|--|-----|--|-----|--|-----|--|-----|--|-----|--|-----|--|-----|--|-----|--|-----|--|-----|--|-----|--|-----|--|-----|--|-----|--|-----|--|-----|--|-----|--|-----|--|-----|--|-----|--|-----|--|-----|--|-----|--|-----|--|-----|--|-----|--|-----|--|-----|--|-----|--|-----|--|-----|--|-----|--|-----|--|-----|--|-----|--|-----|--|-----|--|-----|--|-----|--|-----|--|-----|--|-----|--|-----|--|-----|--|-----|--|-----|--|-----|--|-----|--|-----|--|-----|--|-----|--|-----|--|-----|--|------|--|------|--|------|--|------|--|------|--|------|--|------|--|------|--|------|--|------|--|------|--|------|--|------|--|------|--|------|--|------|--|------|--|------|--|------|--|------|--|------|--|------|--|------|--|------|--|------|--|------|--|------|--|------|--|------|--|------|--|------|--|------|--|------|--|------|--|------|--|------|--|------|--|------|--|------|--|------|--|------|--|------|--|------|--|------|--|------|--|------|--|------|--|------|--|------|--|------|--|------|--|------|--|------|--|------|--|------|--|------|--|------|--|------|--|------|--|------|--|------|--|------|--|------|--|------|--|------|--|------|--|------|--|------|--|------|--|------|--|------|--|------|--|------|--|------|--|------|--|------|--|------|--|------|--|------|--|------|--|------|--|------|--|------|--|------|--|------|--|------|--|------|--|------|--|------|--|------|--|------|--|------|--|------|--|------|--|------|--|------|--|------|--|------|--|------|--|------|--|------|--|------|--|------|--|------|--|------|--|------|--|------|--|------|--|------|--|------|--|------|--|------|--|------|--|------|--|------|--|------|--|------|--|------|--|------|--|------|--|------|--|----|--|





Table with columns for taxonomic classification (Genus, Species, Strain) and a grid of 0/1 values representing genetic markers. The table is organized into rows corresponding to different bacterial species and strains, with columns representing individual markers. The markers are grouped into clusters, with some clusters having a header row indicating their identity and coverage. The table is very dense and covers a wide range of bacterial taxa, including Bacillus, Geobacillus, Listeria, and others.



|    |                                                 |       |      |      |      |      |      |      |      |      |       |      |      |      |      |      |      |      |      |      |       |      |      |       |     |     |     |     |     |          |          |        |       |
|----|-------------------------------------------------|-------|------|------|------|------|------|------|------|------|-------|------|------|------|------|------|------|------|------|------|-------|------|------|-------|-----|-----|-----|-----|-----|----------|----------|--------|-------|
| 1  | TCH843/119A                                     | 0.58  | 0.2  | 0.2  | 0.2  | 0.2  | 0.4  | 0.3  | 0.1  | 0.2  | 0.4   | 0.1  | 0.4  | 0.3  | 0.2  | 0.2  | 0.1  | 0.2  | 0.1  | 0.3  | 0.5   | 0.5  | 0.1  | 0.6   | 0.0 | 0.0 | 0.0 | 0.0 | 0.0 | 32.58    | 26/58    |        |       |
|    | Streptococcus pneumoniae ATCC 700699            | 0.58  | 0.2  | 0.2  | 0.2  | 0.2  | 0.4  | 0.3  | 0.1  | 0.2  | 0.4   | 0.1  | 0.4  | 0.3  | 0.2  | 0.2  | 0.1  | 0.2  | 0.1  | 0.3  | 0.5   | 0.5  | 0.1  | 0.6   | 0.0 | 0.0 | 0.0 | 0.0 | 0.0 | 32.58    | 26/58    |        |       |
| 1  | Streptococcus pneumoniae AP200                  | 0.52  | 0.2  | 0.2  | 0.2  | 0.3  | 0.3  | 0.1  | 0.2  | 0.4  | 0.1   | 0.3  | 0.3  | 0.2  | 0.2  | 0.1  | 0.1  | 0.1  | 0.1  | 0.2  | 0.4   | 0.5  | 0.1  | 0.6   | 0.0 | 0.0 | 0.0 | 0.0 | 0.0 | 30.52    | 22/52    |        |       |
|    | Streptococcus pneumoniae gan7N10373             | 0.57  | 0.2  | 0.2  | 0.2  | 0.2  | 0.4  | 0.3  | 0.1  | 0.2  | 0.4   | 0.1  | 0.4  | 0.3  | 0.2  | 0.2  | 0.1  | 0.2  | 0.1  | 0.3  | 0.5   | 0.4  | 0.1  | 0.6   | 0.0 | 0.0 | 0.0 | 0.0 | 0.0 | 31.67    | 26/57    |        |       |
| 1  | Streptococcus pneumoniae OXC141                 | 0.58  | 0.2  | 0.2  | 0.2  | 0.2  | 0.3  | 0.1  | 0.2  | 0.4  | 0.1   | 0.1  | 0.3  | 0.2  | 0.2  | 0.1  | 0.2  | 0.1  | 0.3  | 0.5  | 0.5   | 0.1  | 0.6  | 0.0   | 0.0 | 0.0 | 0.0 | 0.0 | 0.0 | 32.58    | 26/58    |        |       |
| 1  | Streptococcus pneumoniae INV200                 | 0.52  | 0.2  | 0.2  | 0.2  | 0.3  | 0.3  | 0.1  | 0.2  | 0.4  | 0.1   | 0.1  | 0.3  | 0.2  | 0.2  | 0.1  | 0.1  | 0.1  | 0.1  | 0.2  | 0.4   | 0.5  | 0.1  | 0.6   | 0.0 | 0.0 | 0.0 | 0.0 | 0.0 | 30.52    | 22/52    |        |       |
| 1  | Streptococcus pneumoniae INV104                 | 0.58  | 0.2  | 0.2  | 0.2  | 0.2  | 0.3  | 0.1  | 0.2  | 0.4  | 0.1   | 0.1  | 0.3  | 0.2  | 0.2  | 0.1  | 0.2  | 0.1  | 0.3  | 0.5  | 0.5   | 0.1  | 0.6  | 0.0   | 0.0 | 0.0 | 0.0 | 0.0 | 0.0 | 32.58    | 26/58    |        |       |
| 1  | Streptococcus pneumoniae SPNA45                 | 0.58  | 0.2  | 0.2  | 0.2  | 0.2  | 0.3  | 0.1  | 0.2  | 0.4  | 0.1   | 0.1  | 0.3  | 0.2  | 0.2  | 0.1  | 0.2  | 0.1  | 0.3  | 0.5  | 0.5   | 0.1  | 0.6  | 0.0   | 0.0 | 0.0 | 0.0 | 0.0 | 0.0 | 32.58    | 26/58    |        |       |
| 1  | Streptococcus pneumoniae ST556                  | 0.52  | 0.2  | 0.2  | 0.2  | 0.3  | 0.3  | 0.1  | 0.2  | 0.4  | 0.1   | 0.1  | 0.3  | 0.2  | 0.2  | 0.1  | 0.1  | 0.1  | 0.2  | 0.4  | 0.5   | 0.1  | 0.6  | 0.0   | 0.0 | 0.0 | 0.0 | 0.0 | 0.0 | 30.52    | 22/52    |        |       |
|    |                                                 | 0.0   | 0.0  | 0.0  | 0.0  | 0.0  | 0.0  | 0.0  | 0.0  | 0.0  | 0.0   | 0.0  | 0.0  | 0.0  | 0.0  | 0.0  | 0.0  | 0.0  | 0.0  | 0.0  | 0.0   | 0.0  | 0.0  | 0.0   | 0.0 | 0.0 | 0.0 | 0.0 | 0.0 | 0.0      | 0.0      |        |       |
| 18 | "Micrococcus scarlatinae" Klein 1884            | 1.66  | 0.35 | 0.50 | 0.54 | 0.55 | 0.69 | 0.60 | 0.18 | 0.36 | 0.105 | 0.18 | 0.72 | 0.67 | 0.35 | 0.36 | 0.18 | 0.32 | 0.17 | 0.68 | 0.122 | 0.55 | 0.17 | 0.118 | 0.0 | 0.0 | 0.0 | 0.0 | 0.0 | 784.1166 | 322/1166 |        |       |
| 3  | Streptococcus pyogenes serotype M1              | 0.52  | 0.2  | 0.2  | 0.2  | 0.3  | 0.3  | 0.1  | 0.2  | 0.6  | 0.11  | 0.14 | 0.3  | 0.2  | 0.2  | 0.1  | 0.2  | 0.1  | 0.1  | 0.2  | 0.4   | 0.5  | 0.1  | 0.6   | 0.0 | 0.0 | 0.0 | 0.0 | 0.0 | 30.52    | 22/52    |        |       |
| 1  | Streptococcus pyogenes (serotype 1 / M1 GAS)    | 0.52  | 0.2  | 0.2  | 0.2  | 0.3  | 0.3  | 0.1  | 0.2  | 0.6  | 0.11  | 0.14 | 0.3  | 0.2  | 0.2  | 0.1  | 0.2  | 0.1  | 0.1  | 0.2  | 0.4   | 0.5  | 0.1  | 0.6   | 0.0 | 0.0 | 0.0 | 0.0 | 0.0 | 0.0      | 30.52    | 22/52  |       |
| 1  | Streptococcus pyogenes MGAS5005                 | 0.57  | 0.2  | 0.2  | 0.2  | 0.2  | 0.3  | 0.1  | 0.2  | 0.4  | 0.1   | 0.1  | 0.3  | 0.2  | 0.2  | 0.1  | 0.2  | 0.1  | 0.3  | 0.5  | 0.4   | 0.1  | 0.6  | 0.0   | 0.0 | 0.0 | 0.0 | 0.0 | 0.0 | 0.0      | 31.67    | 26/57  |       |
| 1  | Streptococcus pyogenes M1 476                   | 0.57  | 0.2  | 0.2  | 0.2  | 0.3  | 0.3  | 0.1  | 0.2  | 0.4  | 0.1   | 0.1  | 0.3  | 0.2  | 0.2  | 0.1  | 0.2  | 0.1  | 0.3  | 0.5  | 0.4   | 0.1  | 0.6  | 0.0   | 0.0 | 0.0 | 0.0 | 0.0 | 0.0 | 0.0      | 31.67    | 26/57  |       |
| 2  | Streptococcus pyogenes (serotype M3)            | 0.124 | 0.14 | 0.16 | 0.16 | 0.17 | 0.12 | 0.14 | 0.11 | 0.12 | 0.18  | 0.17 | 0.14 | 0.14 | 0.12 | 0.13 | 0.12 | 0.17 | 0.14 | 0.17 | 0.13  | 0.1  | 0.17 | 0.0   | 0.0 | 0.0 | 0.0 | 0.0 | 0.0 | 0.0      | 88.124   | 26/124 |       |
| 1  | Streptococcus pyogenes SS1-                     | 0.0   | 0.0  | 0.0  | 0.0  | 0.0  | 0.0  | 0.0  | 0.0  | 0.0  | 0.0   | 0.0  | 0.0  | 0.0  | 0.0  | 0.0  | 0.0  | 0.0  | 0.0  | 0.0  | 0.0   | 0.0  | 0.0  | 0.0   | 0.0 | 0.0 | 0.0 | 0.0 | 0.0 | 0.0      | 0.0      |        |       |
| 1  | Streptococcus pyogenes MGAS315                  | 0.67  | 0.2  | 0.3  | 0.3  | 0.3  | 0.4  | 0.1  | 0.2  | 0.6  | 0.11  | 0.14 | 0.4  | 0.2  | 0.2  | 0.1  | 0.2  | 0.1  | 0.4  | 0.7  | 0.3   | 0.1  | 0.7  | 0.0   | 0.0 | 0.0 | 0.0 | 0.0 | 0.0 | 0.0      | 53.67    | 14/67  |       |
| 1  | Streptococcus pyogenes serotype M5              | 0.67  | 0.2  | 0.3  | 0.3  | 0.3  | 0.4  | 0.1  | 0.2  | 0.6  | 0.11  | 0.14 | 0.4  | 0.2  | 0.2  | 0.1  | 0.2  | 0.1  | 0.4  | 0.7  | 0.3   | 0.1  | 0.7  | 0.0   | 0.0 | 0.0 | 0.0 | 0.0 | 0.0 | 0.0      | 53.67    | 14/67  |       |
| 1  | Streptococcus pyogenes (serotype 5 / Manfred)   | 0.65  | 0.1  | 0.3  | 0.3  | 0.3  | 0.4  | 0.1  | 0.2  | 0.6  | 0.11  | 0.14 | 0.4  | 0.1  | 0.2  | 0.1  | 0.2  | 0.1  | 0.4  | 0.7  | 0.3   | 0.1  | 0.7  | 0.0   | 0.0 | 0.0 | 0.0 | 0.0 | 0.0 | 0.0      | 52.05    | 13/65  |       |
| 1  | Streptococcus pyogenes serotype M6              | 0.67  | 0.2  | 0.3  | 0.3  | 0.3  | 0.4  | 0.1  | 0.2  | 0.6  | 0.11  | 0.14 | 0.4  | 0.2  | 0.2  | 0.1  | 0.2  | 0.1  | 0.4  | 0.7  | 0.3   | 0.1  | 0.7  | 0.0   | 0.0 | 0.0 | 0.0 | 0.0 | 0.0 | 0.0      | 53.67    | 14/67  |       |
| 1  | Streptococcus pyogenes MGAS10394                | 0.67  | 0.2  | 0.3  | 0.3  | 0.3  | 0.4  | 0.1  | 0.2  | 0.6  | 0.11  | 0.14 | 0.4  | 0.2  | 0.2  | 0.1  | 0.2  | 0.1  | 0.4  | 0.7  | 0.3   | 0.1  | 0.7  | 0.0   | 0.0 | 0.0 | 0.0 | 0.0 | 0.0 | 0.0      | 53.67    | 14/67  |       |
| 1  | Streptococcus pyogenes (serotype M18)           | 0.67  | 0.2  | 0.3  | 0.3  | 0.3  | 0.4  | 0.1  | 0.2  | 0.6  | 0.11  | 0.14 | 0.4  | 0.2  | 0.2  | 0.1  | 0.2  | 0.1  | 0.4  | 0.7  | 0.3   | 0.1  | 0.7  | 0.0   | 0.0 | 0.0 | 0.0 | 0.0 | 0.0 | 0.0      | 53.67    | 14/67  |       |
| 1  | Streptococcus pyogenes (serotype 18 / MGAS8232) | 0.67  | 0.2  | 0.3  | 0.3  | 0.3  | 0.4  | 0.1  | 0.2  | 0.6  | 0.11  | 0.14 | 0.4  | 0.2  | 0.2  | 0.1  | 0.2  | 0.1  | 0.4  | 0.7  | 0.3   | 0.1  | 0.7  | 0.0   | 0.0 | 0.0 | 0.0 | 0.0 | 0.0 | 0.0      | 53.67    | 14/67  |       |
| 1  | Streptococcus pyogenes serotype M49             | 0.68  | 0.2  | 0.3  | 0.3  | 0.3  | 0.4  | 0.1  | 0.2  | 0.6  | 0.11  | 0.14 | 0.4  | 0.2  | 0.2  | 0.1  | 0.2  | 0.1  | 0.4  | 0.7  | 0.3   | 0.1  | 0.7  | 0.0   | 0.0 | 0.0 | 0.0 | 0.0 | 0.0 | 0.0      | 0.0      | 53.67  | 29/68 |
| 1  | Streptococcus pyogenes NZ131                    | 0.68  | 0.2  | 0.3  | 0.3  | 0.3  | 0.4  | 0.1  | 0.2  | 0.6  | 0.11  | 0.14 | 0.4  | 0.2  | 0.2  | 0.1  | 0.2  | 0.1  | 0.4  | 0.7  | 0.3   | 0.1  | 0.7  | 0.0   | 0.0 | 0.0 | 0.0 | 0.0 | 0.0 | 0.0      | 0.0      | 53.67  | 29/68 |
| 1  | Streptococcus pyogenes serotype M28             | 0.67  | 0.2  | 0.3  | 0.3  | 0.3  | 0.4  | 0.1  | 0.2  | 0.6  | 0.11  | 0.14 | 0.4  | 0.2  | 0.2  | 0.1  | 0.2  | 0.1  | 0.4  | 0.7  | 0.3   | 0.1  | 0.7  | 0.0   | 0.0 | 0.0 | 0.0 | 0.0 | 0.0 | 0.0      | 0.0      | 53.67  | 14/67 |
| 1  | Streptococcus pyogenes MGAS6180                 | 0.67  | 0.2  | 0.3  | 0.3  | 0.3  | 0.4  | 0.1  | 0.2  | 0.6  | 0.11  | 0.14 | 0.4  | 0.2  | 0.2  | 0.1  | 0.2  | 0.1  | 0.4  | 0.7  | 0.3   | 0.1  | 0.7  | 0.0   | 0.0 | 0.0 | 0.0 | 0.0 | 0.0 | 0.0      | 0.0      | 53.67  | 14/67 |
| 2  | Streptococcus pyogenes serotype M12             | 0.124 | 0.14 | 0.16 | 0.16 | 0.17 | 0.12 | 0.14 | 0.11 | 0.12 | 0.18  | 0.17 | 0.14 | 0.14 | 0.12 | 0.13 | 0.12 | 0.17 | 0.14 | 0.17 | 0.13  | 0.1  | 0.17 | 0.0   | 0.0 | 0.0 | 0.0 | 0.0 | 0.0 | 0.0      | 88.124   | 26/124 |       |
| 1  | Streptococcus pyogenes MGAS9429                 | 0.67  | 0.2  | 0.3  | 0.3  | 0.3  | 0.4  | 0.1  | 0.2  | 0.6  | 0.11  | 0.14 | 0.4  | 0.2  | 0.2  | 0.1  | 0.2  | 0.1  | 0.4  | 0.7  | 0.3   | 0.1  | 0.7  | 0.0   | 0.0 | 0.0 | 0.0 | 0.0 | 0.0 | 0.0      | 0.0      | 53.67  | 14/67 |
| 1  | Streptococcus pyogenes MGAS2096                 | 0.67  | 0.2  | 0.3  | 0.3  | 0.3  | 0.4  | 0.1  | 0.2  | 0.6  | 0.11  | 0.14 | 0.4  | 0.2  | 0.2  | 0.1  | 0.2  | 0.1  | 0.4  | 0.7  | 0.3   | 0.1  | 0.7  | 0.0   | 0.0 | 0.0 | 0.0 | 0.0 | 0.0 | 0.0      | 0.0      | 53.67  | 14/67 |
| 1  | Streptococcus pyogenes serotype M2              | 0.67  | 0.2  | 0.3  | 0.3  | 0.3  | 0.4  | 0.1  | 0.2  | 0.6  | 0.11  | 0.14 | 0.4  | 0.2  | 0.2  | 0.1  | 0.2  | 0.1  | 0.4  | 0.7  | 0.3   | 0.1  | 0.7  | 0.0   | 0.0 | 0.0 | 0.0 | 0.0 | 0.0 | 0.0      | 0.0      | 53.67  | 14/67 |
| 1  | Streptococcus pyogenes MGAS10270                | 0.67  | 0.2  | 0.3  | 0.3  | 0.3  | 0.4  | 0.1  | 0.2  | 0.6  | 0.11  | 0.14 | 0.4  | 0.2  | 0.2  | 0.1  | 0.2  | 0.1  | 0.4  | 0.7  | 0.3   | 0.1  | 0.7  | 0.0   | 0.0 | 0.0 | 0.0 | 0.0 | 0.0 | 0.0      | 0.0      | 53.67  | 14/67 |
| 1  | Streptococcus pyogenes serotype M4              | 0.67  | 0.2  | 0.3  | 0.3  | 0.3  | 0.4  | 0.1  | 0.2  | 0.6  | 0.11  | 0.14 | 0.4  | 0.2  | 0.2  | 0.1  | 0.2  | 0.1  | 0.4  | 0.7  | 0.3   | 0.1  | 0.7  | 0.0   | 0.0 | 0.0 | 0.0 | 0.0 | 0.0 | 0.0      | 0.0      | 53.67  | 14/67 |
| 1  | Streptococcus pyogenes MGAS10750                | 0.67  | 0.2  | 0.3  | 0.3  | 0.3  | 0.4  | 0.1  | 0.2  | 0.6  | 0.11  | 0.14 | 0.4  | 0.2  | 0.2  | 0.1  | 0.2  | 0.1  | 0.4  | 0.7  | 0.3   | 0.1  | 0.7  | 0.0   | 0.0 | 0.0 | 0.0 | 0.0 | 0.0 | 0.0      | 0.0      | 53.67  | 14/67 |
| 1  | Streptococcus pyogenes serotype M53             | 0.67  | 0.2  | 0.3  | 0.3  | 0.3  | 0.4  | 0.1  | 0.2  | 0.6  | 0.11  | 0.14 | 0.4  | 0.2  | 0.2  | 0.1  | 0.2  | 0.1  | 0.4  | 0.7  | 0.3   | 0.1  | 0.7  | 0.0   | 0.0 | 0.0 | 0.0 | 0.0 | 0.0 | 0.0      | 0.0      | 53.67  | 14/67 |
| 1  | Streptococcus pyogenes Alab49                   | 0.67  | 0.2  | 0.3  | 0.3  | 0.3  | 0.4  | 0.1  | 0.2  | 0.6  | 0.11  | 0.14 | 0.4  | 0.2  | 0.2  | 0.1  | 0.2  | 0.1  | 0.4  | 0.7  | 0.3   | 0.1  | 0.7  | 0.0   | 0.0 | 0.0 | 0.0 | 0.0 | 0.0 | 0.0      | 0.0      | 53.67  | 14/67 |
| 1  | Streptococcus pyogenes serotype M59             | 0.67  | 0.2  | 0.3  | 0.3  | 0.3  | 0.4  | 0.1  | 0.2  | 0.6  | 0.11  | 0.14 | 0.4  | 0.2  | 0.2  | 0.1  | 0.2  | 0.1  | 0.4  | 0.7  | 0.3   | 0.1  | 0.7  | 0.0   | 0.0 | 0.0 | 0.0 | 0.0 | 0.0 | 0.0      | 0.0      | 53.67  | 14/67 |
| 1  | Streptococcus pyogenes BEI NR-33709             | 0.57  | 0.2  | 0.2  | 0.2  | 0.3  | 0.3  | 0.1  | 0.2  | 0.4  | 0.1   | 0.1  | 0.3  | 0.2  | 0.2  | 0.1  | 0.1  | 0.1  | 0.3  | 0.5  | 0.4   | 0.1  | 0.5  | 0.0   |     |     |     |     |     |          |          |        |       |









































|    |                                                                     |       |       |       |       |        |        |        |        |        |       |       |        |        |        |       |       |        |        |        |        |        |        |        |        |        |       |       |        |        |        |        |        |
|----|---------------------------------------------------------------------|-------|-------|-------|-------|--------|--------|--------|--------|--------|-------|-------|--------|--------|--------|-------|-------|--------|--------|--------|--------|--------|--------|--------|--------|--------|-------|-------|--------|--------|--------|--------|--------|
| 1  | Corynebacterium ulcerans sensu stricto                              | 16.6% | 0.0%  | 0.0%  | 0.0%  | 100.0% | 100.0% | 75.0%  | 100.0% | 100.0% | 0.0%  | 0.0%  | 50.0%  | 33.3%  | 100.0% | 0.0%  | 0.0%  | 66.7%  | 0.0%   | 0.0%   | 0.0%   | 35.7%  | 0.0%   | 0.0%   | 0.0%   | 0.0%   | 36.5% | 26.9% | 17.3%  | 17.3%  | 1.9%   |        |        |
| 1  | Corynebacterium ulcerans BR-AD22                                    | 17.6% | 0.1%  | 0.2%  | 0.1%  | 1.1%   | 3.8%   | 3.4%   | 1.1%   | 1.1%   | 0.3%  | 0.1%  | 2.4%   | 0.3%   | 1.1%   | 0.2%  | 0.1%  | 2.3%   | 0.1%   | 0.3%   | 0.5%   | 2.3%   | 0.1%   | 1.5%   | 0.0%   | 0.0%   | 0.0%  | 20.5% | 14.5%  | 8.9%   | 8.5%   | 1.5%   |        |
| 1  | Corynebacterium ulcerans 102                                        | 17.6% | 0.0%  | 0.0%  | 0.0%  | 1.0%   | 3.0%   | 75.0%  | 100.0% | 100.0% | 0.0%  | 0.0%  | 75.0%  | 50.0%  | 100.0% | 0.0%  | 0.0%  | 66.7%  | 0.0%   | 0.0%   | 0.0%   | 28.7%  | 0.0%   | 0.0%   | 0.0%   | 0.0%   | 35.3% | 27.9% | 16.9%  | 14.9%  | 1.6%   |        |        |
| 1  | Arthrobacter sp. Y-11                                               | 18.8% | 0.0%  | 0.0%  | 0.0%  | 100.0% | 100.0% | 25.0%  | 100.0% | 25.0%  | 0.0%  | 0.0%  | 75.0%  | 66.7%  | 0.0%   | 0.0%  | 0.0%  | 0.3%   | 33.3%  | 100.0% | 75.0%  | 0.0%   | 0.0%   | 0.0%   | 0.0%   | 0.0%   | 0.0%  | 33.3% | 24.8%  | 21.1%  | 14.0%  | 3.5%   |        |
| 1  | Corynebacterium terpenobactrum CIP 109927                           | 22.6% | 0.1%  | 0.2%  | 0.1%  | 1.1%   | 4.5%   | 1.4%   | 1.1%   | 1.4%   | 0.1%  | 3.4%  | 2.3%   | 0.1%   | 0.3%   | 0.1%  | 1.3%  | 1.1%   | 3.4%   | 0.5%   | 1.4%   | 1.1%   | 2.6%   | 0.0%   | 0.0%   | 0.0%   | 19.5% | 14.5% | 12.5%  | 8.5%   | 2.5%   |        |        |
| 1  | AJ 12310                                                            | 21.9% | 0.0%  | 0.0%  | 0.0%  | 100.0% | 20.0%  | 50.0%  | 0.0%   | 0.0%   | 0.0%  | 25.0% | 66.7%  | 0.0%   | 0.0%   | 0.0%  | 0.0%  | 33.3%  | 30.0%  | 0.0%   | 16.7%  | 0.0%   | 0.0%   | 0.0%   | 0.0%   | 0.0%   | 48.2% | 28.6% | 17.9%  | 3.6%   | 1.8%   |        |        |
| 1  | Corynebacterium efficiens DSM 44549                                 | 22.0% | 0.2%  | 0.2%  | 0.1%  | 1.1%   | 2.6%   | 2.6%   | 0.1%   | 0.1%   | 0.3%  | 0.1%  | 1.4%   | 2.3%   | 0.1%   | 0.3%  | 0.1%  | 3.3%   | 0.4%   | 1.3%   | 2.5%   | 0.4%   | 0.1%   | 0.0%   | 0.0%   | 0.0%   | 27.5% | 16.5% | 10.8%  | 2.8%   | 1.6%   |        |        |
| 1  | CCUG 35717                                                          | 13.4% | 1.8%  | 1.1%  | 0.1%  | 1.1%   | 7.8%   | 1.3%   | 1.1%   | 0.1%   | 0.3%  | 0.1%  | 2.4%   | 0.2%   | 0.1%   | 1.2%  | 0.1%  | 1.3%   | 0.1%   | 1.3%   | 1.4%   | 0.2%   | 0.1%   | 0.5%   | 0.0%   | 0.0%   | 17.4% | 14.4% | 7.4%   | 6.4%   | 1.4%   |        |        |
| 1  | Corynebacterium kroppenstedtii CCUG 35717                           | 13.4% | 1.8%  | 1.1%  | 0.1%  | 1.1%   | 7.8%   | 1.3%   | 1.1%   | 0.1%   | 0.3%  | 0.1%  | 2.4%   | 0.2%   | 0.1%   | 1.2%  | 0.1%  | 1.3%   | 0.1%   | 1.3%   | 1.4%   | 0.2%   | 0.1%   | 0.5%   | 0.0%   | 0.0%   | 17.4% | 14.4% | 7.4%   | 6.4%   | 1.4%   |        |        |
| 1  | CCUG 47449                                                          | 23.5% | 1.1%  | 1.2%  | 0.1%  | 1.1%   | 5.4%   | 2.4%   | 0.1%   | 1.4%   | 1.1%  | 3.4%  | 0.2%   | 0.1%   | 0.3%   | 0.1%  | 1.3%  | 0.4%   | 0.1%   | 1.3%   | 2.1%   | 0.3%   | 0.1%   | 1.6%   | 1.1%   | 0.0%   | 15.4% | 13.4% | 12.2%  | 10.4%  | 2.4%   |        |        |
| 1  | Corynebacterium aurimucosum ATCC 700975                             | 23.5% | 1.1%  | 1.2%  | 0.1%  | 1.1%   | 5.4%   | 2.4%   | 0.1%   | 1.4%   | 1.1%  | 3.4%  | 0.2%   | 0.1%   | 0.3%   | 0.1%  | 1.3%  | 0.4%   | 0.1%   | 1.3%   | 2.1%   | 0.3%   | 0.1%   | 1.6%   | 1.1%   | 0.0%   | 15.4% | 13.4% | 12.2%  | 10.4%  | 2.4%   |        |        |
| 1  | CTCC AA 001024                                                      | 15.3% | 1.1%  | 0.2%  | 0.1%  | 1.1%   | 2.5%   | 1.4%   | 1.1%   | 1.1%   | 0.4%  | 0.1%  | 2.4%   | 0.2%   | 0.1%   | 0.2%  | 0.1%  | 1.3%   | 0.1%   | 1.3%   | 1.5%   | 0.3%   | 0.1%   | 2.5%   | 1.1%   | 0.0%   | 18.3% | 12.5% | 8.5%   | 6.5%   | 3.3%   |        |        |
| 1  | Corynebacterium halotolerans DSM 44683                              | 15.3% | 1.1%  | 0.2%  | 0.1%  | 1.1%   | 2.5%   | 1.4%   | 1.1%   | 1.1%   | 0.4%  | 0.1%  | 2.4%   | 0.2%   | 0.1%   | 0.2%  | 0.1%  | 1.3%   | 0.1%   | 1.3%   | 1.5%   | 0.3%   | 0.1%   | 2.5%   | 1.1%   | 0.0%   | 18.3% | 12.5% | 8.5%   | 6.5%   | 3.3%   |        |        |
| 1  | CCUG 50093                                                          | 24.5% | 0.1%  | 1.2%  | 0.1%  | 1.1%   | 4.5%   | 5.4%   | 1.1%   | 1.1%   | 0.2%  | 0.1%  | 3.4%   | 0.2%   | 0.1%   | 0.2%  | 0.1%  | 2.3%   | 1.4%   | 2.3%   | 1.3%   | 1.1%   | 1.5%   | 0.0%   | 0.0%   | 13.0%  | 13.0% | 15.0% | 11.0%  | 5.0%   |        |        |        |
| 1  | Corynebacterium resistens DSM 45100                                 | 48.0% | 0.0%  | 0.0%  | 0.0%  | 100.0% | 80.0%  | 75.0%  | 100.0% | 100.0% | 0.0%  | 0.0%  | 75.0%  | 0.0%   | 0.0%   | 0.0%  | 0.0%  | 66.7%  | 100.0% | 66.7%  | 30.0%  | 33.3%  | 10.0%  | 10.0%  | 0.0%   | 0.0%   | 28.0% | 28.0% | 26.0%  | 22.0%  | 9.0%   |        |        |
| 58 | Mycobacteriaceae                                                    | 387   | 46.1% | 54.6% | 11.6% | 6.7%   | 42.7   | 152    | 48.1   | 61     | 31.7  | 367   | 381    | 387    | 417    | 367   | 387   | 387    | 387    | 387    | 387    | 312.1% | 6.62   | 35     | 12.12% | 0.0%   | 0.0%  | 92.2% | 283.1% | 276.3% | 285.1% | 276.3% | 151.4% |
| 57 | Mycobacterium                                                       | 321   | 75.4% | 88.5% | 18.0% | 9.2%   | 33.3%  | 45.6%  | 78.7%  | 78.7%  | 20.0% | 47    | 45.6%  | 50.0%  | 60.0%  | 0.0%  | 0.0%  | 66.7%  | 70.0%  | 67.0%  | 71.2%  | 38.3%  | 4.61   | 27     | 10.0%  | 0.0%   | 0.0%  | 33.7% | 24.3%  | 17.4%  | 13.9%  | 5.5%   |        |
| 2  | "Bacillus leprei" Hansen 1880                                       | 19.3% | 0.0%  | 0.0%  | 0.0%  | 100.0% | 100.0% | 100.0% | 100.0% | 100.0% | 0.0%  | 0.0%  | 100.0% | 100.0% | 100.0% | 0.0%  | 0.0%  | 100.0% | 100.0% | 100.0% | 100.0% | 100.0% | 0.0%   | 0.0%   | 0.0%   | 0.0%   | 0.0%  | 33.3% | 28.9%  | 15.6%  | 8.9%   | 6.7%   |        |
| 2  | Mycobacterium leprei Br4923                                         | 11.4% | 1.1%  | 0.1%  | 0.1%  | 0.1%   | 3.3%   | 0.3%   | 0.1%   | 0.1%   | 0.3%  | 0.1%  | 1.4%   | 0.2%   | 0.1%   | 0.2%  | 0.1%  | 3.3%   | 0.4%   | 1.3%   | 1.4%   | 0.2%   | 0.1%   | 0.5%   | 0.0%   | 0.0%   | 15.4% | 14.5% | 7.4%   | 4.5%   | 3.4%   |        |        |
| 2  | "Bacillus smegmatis" Trevisan 1889                                  | 44.7  | 1.0%  | 3.0%  | 0.3%  | 0.3%   | 4.9%   | 7.9%   | 0.3%   | 0.3%   | 1.9%  | 0.3%  | 5.1%   | 2.1%   | 1.3%   | 3.6%  | 3.6%  | 1.9%   | 0.3%   | 3.9%   | 1.2%   | 0.6%   | 0.3%   | 7.1%   | 2.2%   | 0.0%   | 0.0%  | 49.1% | 36.0%  | 34.0%  | 24.0%  | 4.4%   |        |
| 1  | Mycobacterium smegmatis MC2 155                                     | 27.0% | 0.2%  | 0.2%  | 0.2%  | 0.2%   | 6.8%   | 4.6%   | 0.2%   | 0.2%   | 0.6%  | 0.2%  | 4.8%   | 2.4%   | 0.2%   | 2.4%  | 2.4%  | 0.6%   | 0.2%   | 2.4%   | 0.8%   | 0.4%   | 0.2%   | 4.0%   | 2.0%   | 0.0%   | 38.4% | 26.4% | 14.4%  | 12.4%  | 4.4%   |        |        |
| 1  | Mycobacterium smegmatis JS623                                       | 27.0% | 0.2%  | 0.2%  | 0.2%  | 0.2%   | 6.8%   | 4.6%   | 0.2%   | 0.2%   | 0.6%  | 0.2%  | 4.8%   | 2.4%   | 0.2%   | 2.4%  | 2.4%  | 0.6%   | 0.2%   | 2.4%   | 0.8%   | 0.4%   | 0.2%   | 4.0%   | 2.0%   | 0.0%   | 38.4% | 26.4% | 14.4%  | 12.4%  | 4.4%   |        |        |
| 1  | "Mycobacterium balnei" Linell and Norden 1952                       | 19.4% | 1.1%  | 0.1%  | 0.1%  | 0.1%   | 2.3%   | 2.3%   | 1.1%   | 1.1%   | 0.3%  | 0.1%  | 2.4%   | 0.2%   | 0.1%   | 1.1%  | 0.3%  | 0.1%   | 1.3%   | 0.4%   | 0.2%   | 0.1%   | 1.5%   | 1.1%   | 0.0%   | 0.0%   | 28.3% | 21.5% | 7.1%   | 17.4%  | 6.5%   |        |        |
| 1  | Mycobacterium marinum M                                             | 41.3% | 1.0%  | 1.0%  | 1.0%  | 1.0%   | 66.7%  | 66.7%  | 100.0% | 100.0% | 0.0%  | 0.0%  | 50.0%  | 10.0%  | 10.0%  | 0.0%  | 0.0%  | 33.3%  | 75.0%  | 10.0%  | 0.0%   | 0.0%   | 0.0%   | 0.0%   | 0.0%   | 0.0%   | 28.3% | 21.5% | 7.1%   | 17.4%  | 6.5%   |        |        |
| 1  | "Mycobacterium chubuense" Tsukamura 1973                            | 15.6% | 0.1%  | 0.1%  | 0.1%  | 0.1%   | 2.3%   | 2.3%   | 0.1%   | 0.1%   | 0.3%  | 0.1%  | 1.4%   | 0.2%   | 0.1%   | 1.1%  | 0.3%  | 0.1%   | 1.3%   | 0.4%   | 0.2%   | 0.1%   | 1.5%   | 1.1%   | 0.0%   | 0.0%   | 28.3% | 21.5% | 7.1%   | 17.4%  | 6.5%   |        |        |
| 1  | Mycobacterium tuberculosis NB84                                     | 33.6% | 0.2%  | 0.2%  | 0.2%  | 0.2%   | 6.8%   | 4.6%   | 0.2%   | 0.2%   | 0.6%  | 0.2%  | 4.8%   | 2.4%   | 0.2%   | 2.4%  | 2.4%  | 0.6%   | 0.2%   | 2.4%   | 0.8%   | 0.4%   | 0.2%   | 4.0%   | 2.0%   | 0.0%   | 38.4% | 26.4% | 14.4%  | 12.4%  | 4.4%   |        |        |
| 2  | ATCC 43909                                                          | 33.6% | 0.2%  | 0.2%  | 0.2%  | 0.2%   | 6.8%   | 4.6%   | 0.2%   | 0.2%   | 0.6%  | 0.2%  | 4.8%   | 2.4%   | 0.2%   | 2.4%  | 2.4%  | 0.6%   | 0.2%   | 2.4%   | 0.8%   | 0.4%   | 0.2%   | 4.0%   | 2.0%   | 0.0%   | 38.4% | 26.4% | 14.4%  | 12.4%  | 4.4%   |        |        |
| 1  | Mycobacterium gilvum Spyr1                                          | 17.4% | 0.1%  | 1.1%  | 0.1%  | 0.1%   | 2.3%   | 2.3%   | 0.1%   | 0.1%   | 0.3%  | 0.1%  | 1.4%   | 0.2%   | 0.1%   | 1.1%  | 0.3%  | 0.1%   | 1.3%   | 0.4%   | 0.2%   | 0.1%   | 1.5%   | 1.1%   | 0.0%   | 0.0%   | 28.3% | 21.5% | 7.1%   | 17.4%  | 6.5%   |        |        |
| 1  | Mycobacterium flavescens ATCC 700033                                | 18.4% | 0.1%  | 1.1%  | 0.1%  | 0.1%   | 2.3%   | 2.3%   | 0.1%   | 0.1%   | 0.3%  | 0.1%  | 1.4%   | 0.2%   | 0.1%   | 1.1%  | 0.3%  | 0.1%   | 1.3%   | 0.4%   | 0.2%   | 0.1%   | 1.5%   | 1.1%   | 0.0%   | 0.0%   | 28.3% | 21.5% | 7.1%   | 17.4%  | 6.5%   |        |        |
| 1  | ATCC 19423                                                          | 19.4% | 1.1%  | 0.1%  | 0.1%  | 0.1%   | 2.3%   | 2.3%   | 0.1%   | 0.1%   | 0.3%  | 0.1%  | 1.4%   | 0.2%   | 0.1%   | 1.1%  | 0.3%  | 0.1%   | 1.3%   | 0.4%   | 0.2%   | 0.1%   | 1.5%   | 1.1%   | 0.0%   | 0.0%   | 28.3% | 21.5% | 7.1%   | 17.4%  | 6.5%   |        |        |
| 1  | Mycobacterium ulcerans Ag99                                         | 42.2% | 1.0%  | 1.0%  | 1.0%  | 1.0%   | 66.7%  | 66.7%  | 100.0% | 100.0% | 0.0%  | 0.0%  | 50.0%  | 10.0%  | 10.0%  | 0.0%  | 0.0%  | 33.3%  | 75.0%  | 10.0%  | 0.0%   | 0.0%   | 0.0%   | 0.0%   | 0.0%   | 0.0%   | 28.3% | 21.5% | 7.1%   | 17.4%  | 6.5%   |        |        |
| 1  | "Mycobacterium rhodesiae" Tsukamura et al. 1971                     | 16.6% | 0.1%  | 0.1%  | 0.1%  | 0.1%   | 3.3%   | 3.3%   | 0.1%   | 0.1%   | 0.3%  | 0.1%  | 1.4%   | 0.2%   | 0.1%   | 1.1%  | 0.3%  | 0.1%   | 1.3%   | 0.4%   | 0.2%   | 0.1%   | 1.5%   | 1.1%   | 0.0%   | 0.0%   | 38.4% | 26.4% | 14.4%  | 12.4%  | 4.4%   |        |        |
| 1  | Mycobacterium rhodesiae NBB3                                        | 31.3% | 31.3% | 31.3% | 31.3% | 31.3%  | 31.3%  | 31.3%  | 31.3%  | 31.3%  | 31.3% | 31.3% | 31.3%  | 31.3%  | 31.3%  | 31.3% | 31.3% | 31.3%  | 31.3%  | 31.3%  | 31.3%  | 31.3%  | 31.3%  | 31.3%  | 31.3%  | 31.3%  | 31.3% | 31.3% | 31.3%  | 31.3%  | 31.3%  |        |        |
| 29 | Mycobacterium complex                                               | 187   | 7.7%  | 10.7% | 10.7% | 0.0%   | 0.0%   | 32.0%  | 100.0% | 100.0% | 0.0%  | 0.0%  | 50.4%  | 18.8%  | 0.0%   | 0.0%  | 0.0%  | 100.0% | 100.0% | 100.0% | 100.0% | 100.0% | 100.0% | 100.0% | 100.0% | 100.0% | 37.5% | 22.3% | 15.5%  | 13.2%  | 6.9%   |        |        |
| 1  | "Mycobacterium tuberculosis typos bohavum" Lehmann and Neumann 1907 | 7.7%  | 7.7%  | 10.7% | 10.7% | 0.0%   | 0.0%   | 32.0%  | 100.0% | 100.0% | 0.0%  | 0.0%  | 50.4%  | 18.8%  | 0.0%   | 0.0%  | 0.0%  | 100.0% | 100.0% | 100.0% | 100.0% | 100.0% | 100.0% | 100.0% | 100.0% | 100.0% | 37.5% | 22.3% | 15.5%  | 13.2%  | 6.9%   |        |        |
| 6  | BCG                                                                 | 6.6%  | 6.6%  | 6.6%  | 6.6%  | 6.6%   | 6.6%   | 6.6%   | 6.6%   | 6.6%   | 6.6%  | 6.6%  | 6.6%   | 6.6%   | 6.6%   | 6.6%  | 6.6%  | 6.6%   | 6.6%   | 6.6%   | 6.6%   | 6.6%   | 6.6%   | 6.6%   | 6.6%   | 6.6%   | 6.6%  | 6.6%  | 6.6%   | 6.6%   | 6.6%   |        |        |
| 6  | Mycobacterium bovis BCG Pasteur 1173P2                              | 13.4% | 1.1%  | 1.1%  | 1.1%  | 1.1%   | 3.3%   | 3.3%   | 1.1%   | 1.1%   | 0.3%  | 0.1%  | 2.4%   | 0.2%   | 0.1%   | 1.1%  | 0.3%  | 0.1%   | 1.3%   | 0.4%   | 0.2%   | 0.1%   | 1.5%   | 1.1%   | 0.0%   | 0.0%   | 28.3% | 21.5% | 7.1%   | 17.4%  | 6.5%   |        |        |
| 1  | Mycobacterium bovis BCG Moreau RDJ                                  | 13.4% | 1.1%  | 1.1%  | 1.1%  | 1.1%   | 3.3%   | 3.3%   | 1.1%   | 1.1%   | 0.3%  | 0.1%  | 2.4%   | 0.2%   | 0.1%   | 1.1%  | 0.3%  | 0.1%   | 1.3%   | 0.4%   | 0.2%   | 0.1%   | 1.5%   | 1.1%   | 0.0%   | 0.0%   | 28.3% | 21.5% | 7.1%   | 17.4%  | 6.5%   |        |        |
| 1  | Mycobacterium bovis BCG Tokyo 172                                   | 13.4% | 1.1%  | 1.1%  | 1.1%  | 1.1%   | 3.3%   | 3.3%   | 1.1%   | 1.1%   | 0.3%  | 0.1%  | 2.4%   | 0.2%   | 0.1%   | 1.1%  | 0.3%  | 0.1%   | 1.3%   | 0.4%   | 0.2%   | 0.1%   | 1.5%   | 1.1%   | 0.0%   | 0.0%   | 28.3% | 21.5% | 7.1%   | 17.4%  | 6.5%   |        |        |
| 1  | Mycobacterium bovis BCG Mexico                                      | 13.4% | 1.1%  | 1.1%  | 1.1%  | 1.1%   | 3.3%   | 3.3%   | 1.1%   | 1.1%   | 0.3%  | 0.1%  | 2.4%   | 0.2%   | 0.1%   | 1.1%  | 0.3%  | 0.1%   | 1.3%   | 0.4%   | 0.2%   | 0.1%   | 1.5%   | 1.1%   | 0.0%   | 0.0%   | 28.3% | 21.5% | 7.1%   | 17.4%  | 6.5%   |        |        |
| 1  | Mycobacterium bovis BCG str. Korea 1168P                            | 13.4% | 1.1%  | 1.1%  | 1.1%  | 1.1%   | 3.3%   | 3.3%   | 1.1%   | 1.1%   | 0.3%  | 0.1%  | 2.4%   | 0.2%   | 0.1%   | 1.1%  | 0.3%  | 0.1%   | 1.3%   | 0.4%   | 0.2%   | 0.1%   | 1.5%   | 1.1%   | 0.0%   | 0.0%   | 28.3% | 21.5% | 7.1%   | 17.4%  | 6.5%   |        |        |
| 1  | Mycobacterium bovis AF2122/97                                       | 13.4% | 1.1%  | 1.1%  | 1.1%  | 1.1%   | 3.3%   | 3.3%   | 1.1%   | 1.1%   | 0.3%  | 0.1%  | 2.4%   | 0.2%   | 0.1%   | 1.1%  | 0.3%  | 0.1%   | 1.3%   | 0.4%   | 0.2%   | 0.1%   | 1.5%   | 1.1%   | 0.0%   | 0.0%   | 28.3% | 21.5% | 7.1%   | 17.4%  | 6.5%   |        |        |
| 22 | "Bacillus tuberculosis" (Zopf 1883) Klein 1884                      | 22.2% | 22.2% | 22.2% | 22.2% | 0.6%   | 21.6%  | 22.2%  | 22.2%  | 22.2%  | 22.2% | 0.6%  | 22.2%  | 22.2%  | 0.4%   | 22.2% | 22.2% | 0.4%   | 22.2%  | 0.8%   | 0.4%   | 22.2%  | 11.0%  | 0.0%   | 0.0%   | 0.0%   | 0.0%  | 37.5% | 22.3%  | 15.5%  | 13.2%  | 6.9%   |        |
| 1  | Mycobacterium tuberculosis CDC1551                                  | 28.9% | 2.2%  | 2.2%  | 0.2%  | 0.2%   | 6.8%   | 4.6%   | 0.2%   | 0.2%   | 0.6%  | 0.2%  | 4.8%   | 2.4%   | 0.2%   | 2.4%  | 2.4%  | 0.6%   | 0.2%   | 2.4%   | 0.8%   | 0.4%   | 0.2%   | 4.0%   | 2.0%   | 0.0%   | 38.4% | 26.4% | 14.4%  | 12.4%  | 4.4%   |        |        |
| 1  | Mycobacterium sp. H37Rv                                             | 28.9% | 2.2%  | 2.2%  | 0.2%  | 0.2%   | 6.8%   | 4.6%</ |        |        |       |       |        |        |        |       |       |        |        |        |        |        |        |        |        |        |       |       |        |        |        |        |        |

|   |                                                                                                  |       |     |     |     |     |      |      |     |     |      |      |       |       |     |     |      |      |      |      |      |      |      |      |     |      |     |     |        |         |        |        |        |        |        |      |      |
|---|--------------------------------------------------------------------------------------------------|-------|-----|-----|-----|-----|------|------|-----|-----|------|------|-------|-------|-----|-----|------|------|------|------|------|------|------|------|-----|------|-----|-----|--------|---------|--------|--------|--------|--------|--------|------|------|
| 1 | <i>Mycobacterium indicus pranii</i> Ahmed et al. 2007                                            | 17/45 | 1/1 | 1/1 | 0/1 | 0/1 | 0/1  | 0/1  | 0/1 | 1/3 | 2/3  | 1/1  | 1/1   | 0/1   | 0/1 | 2/4 | 1/2  | 1/1  | 0/2  | 1/1  | 2/3  | 0/1  | 2/3  | 0/4  | 0/2 | 0/1  | 1/5 | 0/0 | 0/0    | 0/0     | 0/0    | 13/45  | 11/45  | 10/45  | 7/45   | 2/45 | 2/45 |
| 1 | <i>Mycobacterium indicus pranii</i> MTCC 9506                                                    | 17/45 | 1/1 | 1/1 | 0/1 | 0/1 | 1/3  | 2/3  | 1/1 | 1/1 | 0/1  | 0/1  | 2/4   | 1/2   | 1/1 | 0/2 | 1/1  | 0/3  | 0/1  | 1/1  | 2/3  | 0/1  | 2/3  | 0/4  | 0/2 | 0/1  | 1/5 | 0/0 | 0/0    | 0/0     | 0/0    | 13/45  | 11/45  | 10/45  | 7/45   | 2/45 | 2/45 |
| 1 | <i>Mycobacterium yongonense</i>                                                                  | 18/45 | 1/1 | 1/1 | 0/1 | 0/1 | 1/3  | 1/3  | 1/1 | 1/1 | 0/1  | 0/1  | 2/4   | 1/2   | 1/1 | 0/2 | 1/1  | 0/3  | 0/1  | 1/1  | 2/3  | 0/1  | 2/3  | 0/4  | 0/2 | 0/1  | 1/5 | 0/0 | 0/0    | 0/0     | 0/0    | 13/45  | 11/45  | 10/45  | 7/45   | 2/45 | 2/45 |
| 1 | <i>Mycobacterium</i> sp. 05-1390                                                                 | 18/45 | 1/1 | 1/1 | 0/1 | 0/1 | 1/3  | 1/3  | 1/1 | 1/1 | 0/1  | 0/1  | 2/4   | 1/2   | 1/1 | 0/2 | 1/1  | 0/3  | 0/1  | 1/1  | 2/3  | 0/1  | 2/3  | 0/4  | 0/2 | 0/1  | 1/5 | 0/0 | 0/0    | 0/0     | 0/0    | 13/45  | 11/45  | 10/45  | 7/45   | 2/45 | 2/45 |
| 1 | <i>Mycobacterium</i> sp. M5                                                                      | 15/47 | 1/1 | 1/1 | 0/1 | 0/1 | 1/3  | 2/3  | 0/1 | 0/1 | 0/1  | 0/1  | 1/3   | 1/2   | 1/1 | 0/2 | 0/2  | 0/3  | 0/1  | 1/3  | 1/4  | 1/2  | 0/1  | 1/5  | 1/1 | 0/0  | 0/0 | 0/0 | 0/0    | 0/0     | 14/47  | 13/47  | 12/47  | 3/47   | 3/47   | 2/47 |      |
| 1 | <i>Mycobacterium</i> sp. KMS                                                                     | 15/47 | 1/1 | 1/1 | 0/1 | 0/1 | 1/3  | 2/3  | 0/1 | 0/1 | 0/1  | 0/1  | 1/3   | 1/2   | 1/1 | 0/2 | 0/2  | 0/3  | 0/1  | 1/3  | 1/4  | 1/2  | 0/1  | 1/5  | 1/1 | 0/0  | 0/0 | 0/0 | 0/0    | 14/47   | 13/47  | 12/47  | 3/47   | 3/47   | 2/47   |      |      |
| 1 | <i>Mycobacterium liflandii</i> Trott et al. 2004                                                 | 21/47 | 1/1 | 1/1 | 0/1 | 0/1 | 2/3  | 2/3  | 1/1 | 1/1 | 0/1  | 0/1  | 2/4   | 0/1   | 0/1 | 0/2 | 1/1  | 2/3  | 0/1  | 3/4  | 3/4  | 0/2  | 0/1  | 1/5  | 1/1 | 0/0  | 0/0 | 0/0 | 0/0    | 14/47   | 12/47  | 12/47  | 7/47   | 2/47   | 2/47   |      |      |
| 1 | <i>Mycobacterium liflandii</i> 128FXT                                                            | 147   | 1/1 | 1/1 | 0/1 | 0/1 | 2/3  | 2/3  | 1/1 | 1/1 | 0/1  | 0/1  | 2/4   | 0/1   | 0/1 | 0/2 | 1/1  | 2/3  | 0/1  | 3/4  | 3/4  | 0/2  | 0/1  | 1/5  | 1/1 | 0/0  | 0/0 | 0/0 | 0/0    | 14/47   | 12/47  | 12/47  | 7/47   | 2/47   | 2/47   |      |      |
| 3 | <i>Mycobacterium chelonae</i> group                                                              | 137   | 3/3 | 3/3 | 0/0 | 0/0 | 6/9  | 6/9  | 3/3 | 3/3 | 6/9  | 6/9  | 5/12  | 6/12  | 2/2 | 2/2 | 3/6  | 2/9  | 3/3  | 5/9  | 1/2  | 2/5  | 3/3  | 3/15 | 0/0 | 0/0  | 0/0 | 0/0 | 0/0    | 10/137  | 37/137 | 35/137 | 14/137 | 5/137  | 3/137  |      |      |
| 3 | <i>Mycobacterium abscessus</i> subgroup "Mycobacterium abscessus" Moore and French 1953          | 137   | 3/3 | 3/3 | 0/0 | 0/0 | 6/9  | 6/9  | 3/3 | 3/3 | 6/9  | 6/9  | 5/12  | 6/12  | 2/2 | 2/2 | 3/6  | 2/9  | 3/3  | 5/9  | 1/2  | 2/5  | 3/3  | 3/15 | 0/0 | 0/0  | 0/0 | 0/0 | 0/0    | 10/137  | 37/137 | 35/137 | 14/137 | 5/137  | 3/137  |      |      |
| 2 | <i>Mycobacterium abscessus</i> subsp. massiliensis "Leo et al. 2009                              | 39/61 | 0/2 | 2/2 | 0/0 | 0/0 | 4/6  | 4/6  | 2/2 | 2/2 | 4/6  | 4/6  | 3/18  | 4/18  | 1/4 | 1/4 | 0/4  | 0/4  | 2/4  | 1/6  | 2/2  | 3/8  | 0/8  | 1/3  | 0/2 | 2/10 | 0/0 | 0/0 | 0/0    | 29/61   | 25/61  | 24/61  | 10/61  | 1/61   | 1/61   |      |      |
| 1 | <i>Mycobacterium abscessus</i> subsp. boletii GO 06                                              | 19/45 | 0/1 | 1/1 | 0/1 | 0/1 | 2/3  | 2/3  | 1/1 | 0/1 | 2/3  | 0/1  | 2/4   | 2/3   | 0/0 | 0/0 | 1/2  | 0/3  | 1/4  | 2/3  | 0/4  | 0/1  | 1/5  | 0/0  | 0/0 | 0/0  | 0/0 | 0/0 | 0/0    | 15/45   | 13/45  | 12/45  | 4/45   | 1/45   | 1/45   |      |      |
| 1 | <i>Mycobacterium abscessus</i> subsp. boletii 5094A                                              | 20/46 | 0/1 | 1/1 | 0/1 | 0/1 | 2/3  | 2/3  | 1/1 | 0/1 | 2/3  | 0/1  | 2/4   | 2/3   | 0/0 | 0/0 | 1/2  | 0/3  | 1/4  | 2/3  | 0/4  | 0/1  | 1/5  | 0/0  | 0/0 | 0/0  | 0/0 | 0/0 | 0/0    | 14/46   | 12/46  | 12/46  | 4/46   | 1/46   | 1/46   |      |      |
| 1 | <i>Mycobacterium</i> sp. 506                                                                     | 18/45 | 1/1 | 1/1 | 0/1 | 0/1 | 1/3  | 1/3  | 1/1 | 1/1 | 0/1  | 0/1  | 2/4   | 1/2   | 1/1 | 0/2 | 1/1  | 0/3  | 0/1  | 1/3  | 1/4  | 1/2  | 0/1  | 1/5  | 0/0 | 0/0  | 0/0 | 0/0 | 0/0    | 13/45   | 10/45  | 10/45  | 8/45   | 2/45   | 2/45   |      |      |
| 1 | <i>Mycobacterium</i> sp. MOT36Y                                                                  | 18/45 | 1/1 | 1/1 | 0/1 | 0/1 | 1/3  | 1/3  | 1/1 | 1/1 | 0/1  | 0/1  | 2/4   | 1/2   | 1/1 | 0/2 | 1/1  | 0/3  | 0/1  | 1/3  | 1/4  | 1/2  | 0/1  | 1/5  | 0/0 | 0/0  | 0/0 | 0/0 | 0/0    | 13/45   | 10/45  | 10/45  | 8/45   | 2/45   | 2/45   |      |      |
| 1 | <i>Amycolicoccus</i>                                                                             | 7/45  | 0/1 | 0/1 | 0/1 | 0/1 | 0/3  | 0/3  | 0/1 | 0/1 | 0/3  | 0/1  | 2/4   | 1/2   | 0/1 | 0/2 | 0/1  | 0/3  | 0/1  | 0/3  | 0/4  | 0/2  | 0/1  | 2/5  | 0/0 | 0/0  | 0/0 | 0/0 | 0/0    | 18/45   | 14/45  | 14/45  | 4/45   | 3/45   | 2/45   |      |      |
| 1 | <i>Amycolicoccus subflavus</i>                                                                   | 15/49 | 0/1 | 0/1 | 0/1 | 0/1 | 0/3  | 0/3  | 0/0 | 0/0 | 0/3  | 0/0  | 2/5   | 0/5   | 0/0 | 0/0 | 0/0  | 0/0  | 0/0  | 0/0  | 0/0  | 0/0  | 0/0  | 4/0  | 0/0 | 0/0  | 0/0 | 0/0 | 0/0    | 40/0    | 31/0   | 31/0   | 8/0    | 8/0    | 4/0    |      |      |
| 1 | <i>Amycolicoccus subflavus</i> DQ53-9A1                                                          | 16/49 | 0/1 | 0/1 | 0/1 | 0/1 | 0/3  | 0/3  | 0/0 | 0/0 | 0/3  | 0/0  | 2/5   | 0/5   | 0/0 | 0/0 | 0/0  | 0/0  | 0/0  | 0/0  | 0/0  | 0/0  | 4/0  | 0/0  | 0/0 | 0/0  | 0/0 | 0/0 | 0/0    | 40/0    | 31/0   | 31/0   | 8/0    | 8/0    | 4/0    |      |      |
| 7 | <i>Noctariaceae</i>                                                                              | 107   | 3/3 | 3/3 | 0/0 | 0/0 | 12/9 | 12/9 | 3/3 | 3/3 | 12/9 | 12/9 | 8/21  | 8/21  | 3/6 | 3/6 | 2/6  | 2/6  | 2/6  | 3/6  | 2/6  | 2/6  | 2/6  | 2/6  | 2/6 | 0/0  | 0/0 | 0/0 | 0/0    | 103/353 | 96/353 | 51/353 | 32/353 | 15/353 | 13/353 |      |      |
| 3 | <i>Micropolyspora</i>                                                                            | 12/18 | 0/6 | 0/3 | 0/3 | 0/3 | 4/12 | 3/9  | 1/3 | 1/3 | 4/4  | 4/4  | 9/12  | 3/6   | 0/3 | 0/3 | 3/3  | 5/10 | 2/3  | 2/3  | 3/3  | 0/6  | 3/3  | 0/3  | 0/0 | 0/0  | 0/0 | 0/0 | 0/1    | 19/152  | 19/152 | 19/152 | 13/152 | 8/152  | 8/152  |      |      |
| 1 | <i>Actinomyces brasiliensis</i> (Lindenberg 1909) Gomes 1923                                     | 14/51 | 0/2 | 0/1 | 0/1 | 0/1 | 1/4  | 1/3  | 0/1 | 0/2 | 0/3  | 0/1  | 3/4   | 1/2   | 0/1 | 0/2 | 1/2  | 2/3  | 1/1  | 1/3  | 2/4  | 0/2  | 0/1  | 1/6  | 0/0 | 0/0  | 0/0 | 0/0 | 18/51  | 13/51   | 8/51   | 6/51   | 4/51   | 4/51   |        |      |      |
| 1 | <i>Noctaria brasiliensis</i> ATCC 700358                                                         | 14/51 | 0/2 | 0/1 | 0/1 | 0/1 | 1/4  | 1/3  | 0/1 | 0/2 | 0/3  | 0/1  | 3/4   | 1/2   | 0/1 | 0/2 | 1/2  | 2/3  | 1/1  | 1/3  | 2/4  | 0/2  | 0/1  | 1/6  | 0/0 | 0/0  | 0/0 | 0/0 | 18/51  | 13/51   | 8/51   | 6/51   | 4/51   | 4/51   |        |      |      |
| 1 | <i>Actinomyces bovis</i> farcinicus Gasperi 1894                                                 | 14/52 | 0/2 | 0/1 | 0/1 | 0/1 | 1/4  | 1/3  | 0/1 | 0/1 | 2/3  | 0/2  | 3/4   | 1/2   | 0/1 | 0/3 | 0/2  | 1/4  | 0/1  | 1/3  | 0/4  | 0/2  | 0/1  | 1/6  | 0/0 | 0/0  | 0/0 | 0/0 | 18/52  | 16/52   | 9/52   | 5/52   | 4/52   | 2/52   |        |      |      |
| 1 | <i>Noctardia farcinica</i> IFM 10152                                                             | 14/52 | 0/2 | 0/1 | 0/1 | 0/1 | 1/4  | 1/3  | 0/1 | 0/1 | 2/3  | 0/2  | 3/4   | 1/2   | 0/1 | 0/3 | 0/2  | 1/4  | 0/1  | 1/3  | 0/4  | 0/2  | 0/1  | 1/6  | 0/0 | 0/0  | 0/0 | 0/0 | 18/52  | 16/52   | 9/52   | 5/52   | 4/52   | 2/52   |        |      |      |
| 1 | <i>CCUC</i> 48295                                                                                | 15/49 | 0/2 | 0/1 | 0/1 | 0/1 | 1/4  | 1/3  | 0/1 | 0/1 | 2/3  | 0/2  | 3/4   | 1/2   | 0/1 | 0/3 | 0/2  | 1/4  | 0/1  | 1/3  | 0/4  | 0/2  | 0/1  | 1/6  | 0/0 | 0/0  | 0/0 | 0/0 | 18/49  | 16/49   | 9/49   | 5/49   | 4/49   | 2/49   |        |      |      |
| 1 | <i>Noctaria cypriotegeica</i> GUH-2                                                              | 15/49 | 0/2 | 0/1 | 0/1 | 0/1 | 1/4  | 1/3  | 0/1 | 0/1 | 2/3  | 0/2  | 3/4   | 1/2   | 0/1 | 0/3 | 0/2  | 1/4  | 0/1  | 1/3  | 0/4  | 0/2  | 0/1  | 1/6  | 0/0 | 0/0  | 0/0 | 0/0 | 18/49  | 16/49   | 9/49   | 5/49   | 4/49   | 2/49   |        |      |      |
| 1 | <i>Rhodococcus</i>                                                                               | 5/11  | 5/5 | 0/5 | 0/4 | 0/4 | 8/16 | 6/16 | 2/4 | 2/4 | 2/4  | 2/4  | 18/18 | 18/18 | 0/4 | 0/8 | 6/12 | 4/4  | 2/12 | 1/12 | 1/12 | 1/12 | 1/12 | 1/12 | 0/0 | 0/0  | 0/0 | 0/0 | 57/201 | 54/201  | 32/201 | 19/201 | 11/201 | 7/201  |        |      |      |
| 1 | <i>Mycobacterium erythropolis</i> Gray and Thornton 1928                                         | 15/52 | 0/2 | 0/1 | 0/1 | 0/1 | 1/4  | 1/4  | 0/1 | 0/1 | 1/3  | 0/1  | 1/4   | 0/3   | 0/1 | 0/1 | 0/2  | 0/3  | 0/3  | 0/3  | 0/3  | 0/4  | 0/2  | 0/1  | 1/6 | 0/0  | 0/0 | 0/0 | 17/152 | 15/152  | 8/152  | 7/152  | 3/152  | 2/152  |        |      |      |
| 1 | <i>Rhodococcus erythropolis</i> (strain PR4)                                                     | 15/52 | 0/2 | 0/1 | 0/1 | 0/1 | 1/4  | 1/4  | 0/1 | 0/1 | 1/3  | 0/1  | 1/4   | 0/3   | 0/1 | 0/1 | 0/2  | 0/3  | 0/3  | 0/3  | 0/3  | 0/4  | 0/2  | 0/1  | 1/6 | 0/0  | 0/0 | 0/0 | 17/152 | 15/152  | 8/152  | 7/152  | 3/152  | 2/152  |        |      |      |
| 1 | <i>Noctaria opaca</i> Aggag and Schlegel 1973                                                    | 16/52 | 0/2 | 0/1 | 0/1 | 0/1 | 1/4  | 1/4  | 0/1 | 0/1 | 1/3  | 0/1  | 1/4   | 0/3   | 0/1 | 0/1 | 0/2  | 0/3  | 0/3  | 0/3  | 0/3  | 0/4  | 0/2  | 0/1  | 1/6 | 0/0  | 0/0 | 0/0 | 14/148 | 11/148  | 9/148  | 7/148  | 5/148  | 3/148  |        |      |      |
| 1 | <i>Mycobacterium opacus</i> B4                                                                   | 16/49 | 2/2 | 0/1 | 0/1 | 0/1 | 2/4  | 1/4  | 1/1 | 0/1 | 0/3  | 0/1  | 3/4   | 1/2   | 0/1 | 0/1 | 0/2  | 0/3  | 0/3  | 0/3  | 0/3  | 0/4  | 0/2  | 0/1  | 1/5 | 0/0  | 0/0 | 0/0 | 14/49  | 11/49   | 9/49   | 7/49   | 5/49   | 3/49   |        |      |      |
| 1 | <i>Bacillus hoagii</i> Morse 1912                                                                | 15/51 | 0/2 | 0/1 | 0/1 | 0/1 | 2/4  | 2/4  | 0/0 | 0/0 | 0/0  | 0/0  | 3/5   | 0/5   | 0/0 | 0/0 | 0/0  | 0/0  | 0/0  | 0/0  | 0/0  | 0/0  | 0/0  | 0/0  | 0/0 | 0/0  | 0/0 | 0/0 | 28/62  | 22/48   | 18/48  | 14/36  | 10/26  | 6/16   |        |      |      |
| 1 | <i>Rhodococcus equi</i> 103S                                                                     | 15/51 | 0/2 | 0/1 | 0/1 | 0/1 | 2/4  | 2/4  | 0/0 | 0/0 | 0/0  | 0/0  | 3/5   | 0/5   | 0/0 | 0/0 | 0/0  | 0/0  | 0/0  | 0/0  | 0/0  | 0/0  | 0/0  | 0/0  | 0/0 | 0/0  | 0/0 | 0/0 | 28/62  | 22/48   | 18/48  | 14/36  | 10/26  | 6/16   |        |      |      |
| 1 | <i>Rhodococcus jostii</i> RHA1                                                                   | 18/49 | 2/2 | 0/1 | 0/1 | 0/1 | 2/4  | 1/4  | 1/1 | 0/1 | 1/3  | 0/1  | 4/4   | 2/2   | 1/1 | 0/2 | 0/2  | 2/3  | 1/1  | 1/3  | 2/4  | 0/2  | 0/1  | 2/5  | 0/0 | 0/0  | 0/0 | 0/0 | 14/49  | 13/49   | 9/49   | 9/49   | 4/49   | 4/49   |        |      |      |
| 3 | <i>Gordoniaceae</i>                                                                              | 101   | 3/3 | 2/3 | 0/3 | 1/3 | 3/10 | 6/10 | 0/3 | 0/3 | 3/9  | 0/3  | 7/12  | 2/6   | 1/3 | 1/6 | 4/4  | 1/9  | 0/3  | 3/9  | 3/12 | 0/6  | 1/3  | 9/15 | 1/2 | 0/0  | 0/0 | 0/0 | 32/140 | 30/140  | 25/140 | 25/140 | 18/140 | 10/140 |        |      |      |
| 3 | <i>Gordonia</i> (sic) "Tsukamura et al. 1970 (Gordonia) (sic) bronchialis" Tsukamura et al. 1971 | 13/46 | 1/0 | 2/3 | 0/3 | 1/3 | 3/10 | 6/10 | 0/3 | 0/3 | 3/9  | 0/3  | 7/12  | 2/6   | 1/3 | 1/6 | 4/4  | 1/9  | 0/3  | 3/9  | 3/12 | 0/6  | 1/3  | 9/15 | 1/2 | 0/0  | 0/0 | 0/0 | 32/140 | 30/140  | 25/140 | 25/140 | 18/140 | 10/140 |        |      |      |
| 1 | <i>Gordonia bronchialis</i> ATCC 25592                                                           | 13/46 | 1/0 | 2/3 | 0/3 | 1/3 | 3/10 | 6/10 | 0/3 | 0/3 | 3/9  | 0/3  | 7/12  | 2/6   | 1/3 | 1/6 | 4/4  | 1/9  | 0/3  | 3/9  | 3/12 | 0/6  | 1/3  | 9/15 | 1/2 | 0/0  | 0/0 | 0/0 | 32/140 | 30/140  | 25/140 | 25/140 | 18/140 | 10/140 |        |      |      |
| 1 | <i>ATCC</i> BAA-14                                                                               | 18/49 | 1/1 | 1/1 | 0/1 | 0/1 | 1/4  | 1/4  | 0/1 | 0/1 | 1/3  | 0/1  | 1/4   | 0/3   | 0/1 | 0/1 | 0/2  | 0/3  | 0/3  | 0/3  | 0/3  | 0/4  | 0/2  | 0/1  | 1/6 | 0/0  | 0/0 | 0/0 | 10/49  | 10/49   | 9/49   | 9/49   | 4/49   | 4/49   |        |      |      |
| 1 | <i>Gordonia pilosularum</i> V2                                                                   | 18/49 | 1/1 | 1/1 | 0/1 | 0/1 | 1/4  | 1/4  | 0/1 | 0/1 | 1/3  | 0/1  | 1/4   | 0/3   | 0/1 | 0/1 | 0/2  | 0/3  | 0/3  | 0/3  | 0/3  | 0/4  | 0/2  | 0/1  | 1/6 | 0/0  | 0/0 | 0/0 | 10/49  | 10/49   | 9/49   | 9/49   | 4/49   |        |        |      |      |







|    |                                                                                  |       |      |      |      |      |      |      |      |      |      |      |      |      |      |      |      |      |      |      |      |      |      |      |      |      |      |      |      |         |         |        |       |       |       |      |      |
|----|----------------------------------------------------------------------------------|-------|------|------|------|------|------|------|------|------|------|------|------|------|------|------|------|------|------|------|------|------|------|------|------|------|------|------|------|---------|---------|--------|-------|-------|-------|------|------|
| 2  | ATCC 51383                                                                       | 0/66  | 0/2  | 0/2  | 0/2  | 0/2  | 0/4  | 0/2  | 0/2  | 0/2  | 0/2  | 0/2  | 0/2  | 0/6  | 0/4  | 0/4  | 0/2  | 0/2  | 0/2  | 0/2  | 0/2  | 0/2  | 0/4  | 0/6  | 0/1  | 0/2  | 0/8  | 0/0  | 0/0  | 0/1     | 0/0     | 40/66  | 24/66 | 2/66  |       |      |      |
| 1  | Borrelia garinii BgVr                                                            | 0.0%  | 0.0% | 0.0% | 0.0% | 0.0% | 0.0% | 0.0% | 0.0% | 0.0% | 0.0% | 0.0% | 0.0% | 0.0% | 0.0% | 0.0% | 0.0% | 0.0% | 0.0% | 0.0% | 0.0% | 0.0% | 0.0% | 0.0% | 0.0% | 0.0% | 0.0% | 0.0% | 0.0% | 0.0%    | 0.0%    | 60.6%  | 36.4% | 3.0%  |       |      |      |
| 1  | Borrelia garinii NMJW1                                                           | 0/33  | 0/1  | 0/1  | 0/1  | 0/1  | 0/2  | 0/1  | 0/1  | 0/1  | 0/1  | 0/1  | 0/1  | 0/3  | 0/2  | 0/2  | 0/1  | 0/1  | 0/1  | 0/1  | 0/2  | 0/3  | 0/0  | 0/1  | 0/4  | 0/0  | 0/0  | 0/1  | 0/0  | 20/33   | 12/33   | 1/33   |       |       |       |      |      |
| 1  | "Borrelia bisetii" Postic et al. 1998                                            | 0/33  | 0/1  | 0/1  | 0/1  | 0/1  | 0/2  | 0/1  | 0/1  | 0/1  | 0/1  | 0/1  | 0/1  | 0/3  | 0/2  | 0/2  | 0/1  | 0/1  | 0/1  | 0/1  | 0/2  | 0/3  | 0/1  | 0/1  | 0/4  | 0/0  | 0/0  | 0/1  | 0/0  | 20/33   | 12/33   | 1/33   |       |       |       |      |      |
| 1  | Borrelia bisetii DN127                                                           | 0/33  | 0/1  | 0/1  | 0/1  | 0/1  | 0/2  | 0/1  | 0/1  | 0/1  | 0/1  | 0/1  | 0/1  | 0/3  | 0/2  | 0/2  | 0/1  | 0/1  | 0/1  | 0/1  | 0/2  | 0/3  | 0/1  | 0/1  | 0/4  | 0/0  | 0/0  | 0/1  | 0/0  | 20/33   | 12/33   | 1/33   |       |       |       |      |      |
| 1  | "Borrelia baviariensis" Margos et al. 2009                                       | 0/33  | 0/1  | 0/1  | 0/1  | 0/1  | 0/2  | 0/1  | 0/1  | 0/1  | 0/1  | 0/1  | 0/1  | 0/3  | 0/2  | 0/2  | 0/1  | 0/1  | 0/1  | 0/1  | 0/2  | 0/3  | 0/1  | 0/1  | 0/4  | 0/0  | 0/0  | 0/1  | 0/0  | 21/33   | 11/33   | 1/33   |       |       |       |      |      |
| 1  | Borrelia baviariensis PBI                                                        | 0.0%  | 0.0% | 0.0% | 0.0% | 0.0% | 0.0% | 0.0% | 0.0% | 0.0% | 0.0% | 0.0% | 0.0% | 0.0% | 0.0% | 0.0% | 0.0% | 0.0% | 0.0% | 0.0% | 0.0% | 0.0% | 0.0% | 0.0% | 0.0% | 0.0% | 0.0% | 0.0% | 0.0% | 0.0%    | 63.6%   | 33.3%  | 3.0%  |       |       |      |      |
| 4  | "Ehrenbergia" Gierschkievics 1939                                                | 0/185 | 0/5  | 0/5  | 0/4  | 0/5  | 0/12 | 0/11 | 0/4  | 0/4  | 0/12 | 0/4  | 0/6  | 0/18 | 0/14 | 0/12 | 0/4  | 0/18 | 0/14 | 0/12 | 0/20 | 0/17 | 0/14 | 0/20 | 0/10 | 0/0  | 0/0  | 0/0  | 0/0  | 50/185  | 73/185  | 13/185 | 3/185 | 2/185 | 1/185 |      |      |
| 2  | ATCC 700085                                                                      | 0/182 | 0/2  | 0/2  | 0/2  | 0/2  | 0/16 | 0/2  | 0/2  | 0/16 | 0/2  | 0/8  | 0/2  | 0/14 | 0/2  | 0/16 | 0/2  | 0/8  | 0/10 | 0/4  | 0/2  | 0/10 | 0/0  | 0/0  | 0/0  | 0/0  | 0/0  | 0/0  | 0/0  | 44/182  | 31/182  | 12/182 | 2/182 | 2/182 | 1/182 |      |      |
| 1  | Spirochaeta thermophila DSM 6192                                                 | 0/44  | 0/1  | 0/1  | 0/1  | 0/1  | 0/7  | 0/3  | 0/1  | 0/1  | 0/3  | 0/1  | 0/4  | 0/2  | 0/1  | 0/2  | 0/1  | 0/3  | 0/1  | 0/3  | 0/5  | 0/2  | 0/1  | 0/5  | 0/0  | 0/0  | 0/0  | 0/0  | 0/0  | 22/44   | 16/44   | 1/44   | 1/44  | 1/44  | 1/44  |      |      |
| 1  | Treponema thomasi DSM 6578                                                       | 0/44  | 0/1  | 0/1  | 0/1  | 0/2  | 0/3  | 0/2  | 0/1  | 0/1  | 0/3  | 0/1  | 0/4  | 0/2  | 0/1  | 0/2  | 0/1  | 0/3  | 0/1  | 0/3  | 0/5  | 0/1  | 0/5  | 0/0  | 0/0  | 0/0  | 0/0  | 0/0  | 0/0  | 47/44   | 34/44   | 13/44  | 2/44  | 2/44  | 2/44  |      |      |
| 1  | ATCC 700263                                                                      | 0/44  | 0/1  | 0/1  | 0/1  | 0/2  | 0/3  | 0/2  | 0/1  | 0/1  | 0/3  | 0/1  | 0/4  | 0/2  | 0/1  | 0/2  | 0/1  | 0/3  | 0/1  | 0/3  | 0/5  | 0/1  | 0/5  | 0/0  | 0/0  | 0/0  | 0/0  | 0/0  | 0/0  | 23/44   | 21/44   | 1/44   | 1/44  | 1/44  | 1/44  |      |      |
| 1  | Spirochaeta africana DSM 8902                                                    | 0/44  | 0/2  | 0/2  | 0/2  | 0/1  | 0/3  | 0/1  | 0/1  | 0/3  | 0/1  | 0/4  | 0/2  | 0/1  | 0/2  | 0/1  | 0/3  | 0/1  | 0/3  | 0/5  | 0/1  | 0/5  | 0/0  | 0/0  | 0/0  | 0/0  | 0/0  | 0/0  | 0/0  | 0/0     | 28/44   | 19/44  | 1/44  | 1/44  | 1/44  | 1/44 |      |
| 1  | DSM 11293                                                                        | 0.0%  | 0.0% | 0.0% | 0.0% | 0.0% | 0.0% | 0.0% | 0.0% | 0.0% | 0.0% | 0.0% | 0.0% | 0.0% | 0.0% | 0.0% | 0.0% | 0.0% | 0.0% | 0.0% | 0.0% | 0.0% | 0.0% | 0.0% | 0.0% | 0.0% | 0.0% | 0.0% | 0.0% | 0.0%    | 63.6%   | 33.3%  | 3.0%  |       |       |      |      |
| 1  | Spirochaeta smaragdina DSM 11293                                                 | 0/44  | 0/2  | 0/2  | 0/2  | 0/1  | 0/3  | 0/1  | 0/1  | 0/3  | 0/1  | 0/4  | 0/2  | 0/1  | 0/2  | 0/1  | 0/3  | 0/1  | 0/3  | 0/5  | 0/2  | 0/1  | 0/5  | 0/0  | 0/0  | 0/0  | 0/0  | 0/0  | 0/0  | 0/0     | 28/44   | 19/44  | 1/44  | 1/44  | 1/44  | 1/44 |      |
| 16 | "Microspironema" Stiles and Pfender 1945                                         | 1/82  | 0/18 | 0/18 | 0/20 | 1/43 | 0/33 | 0/18 | 0/18 | 0/18 | 0/18 | 0/17 | 0/38 | 0/18 | 0/38 | 0/18 | 0/25 | 0/18 | 0/18 | 0/18 | 0/18 | 0/18 | 0/18 | 0/18 | 0/0  | 0/0  | 0/0  | 0/0  | 0/0  | 45/82   | 32/82   | 3/82   | 1/82  | 1/82  | 1/82  |      |      |
| 16 | "Spirillum dentum" (Miller 1889) Sternberg 1892                                  | 0/43  | 0/1  | 0/1  | 0/1  | 0/1  | 0/2  | 0/2  | 0/1  | 0/1  | 0/3  | 0/1  | 0/4  | 0/2  | 0/1  | 0/2  | 0/1  | 0/3  | 0/1  | 0/3  | 0/4  | 0/2  | 0/1  | 0/5  | 0/0  | 0/0  | 0/0  | 0/0  | 0/0  | 0/0     | 28/43   | 15/43  | 1/43  | 1/43  | 1/43  | 1/43 |      |
| 1  | Treponema denticola ATCC 35405                                                   | 0/43  | 0/1  | 0/1  | 0/1  | 0/1  | 0/2  | 0/1  | 0/1  | 0/3  | 0/1  | 0/4  | 0/2  | 0/1  | 0/2  | 0/1  | 0/3  | 0/1  | 0/3  | 0/4  | 0/2  | 0/1  | 0/5  | 0/0  | 0/0  | 0/0  | 0/0  | 0/0  | 0/0  | 0/0     | 28/43   | 15/43  | 1/43  | 1/43  | 1/43  | 1/43 |      |
| 9  | "Microspironema pallidum" (Schaudinn and Hoffman 1905) Stiles and Pfender 1905   | 1/11  | 0/5  | 0/11 | 0/11 | 0/11 | 0/22 | 0/33 | 0/11 | 0/11 | 0/33 | 0/11 | 0/44 | 0/22 | 0/11 | 0/22 | 0/11 | 0/33 | 0/11 | 0/33 | 0/55 | 0/22 | 0/11 | 0/55 | 0/0  | 0/0  | 0/0  | 0/0  | 0/0  | 279/495 | 205/495 | 11/495 | 1/495 | 1/495 | 1/495 |      |      |
| 5  | "Treponema pallidum subsp. pallidum" (Schaudinn and Hoffman 1905) Schaudinn 1905 | 7/135 | 0/7  | 0/7  | 0/7  | 0/14 | 0/21 | 0/7  | 0/21 | 0/7  | 0/21 | 0/7  | 0/28 | 0/14 | 0/7  | 0/21 | 0/7  | 0/21 | 0/7  | 0/21 | 0/35 | 0/14 | 0/7  | 0/35 | 0/0  | 0/0  | 0/0  | 0/0  | 0/0  | 179/135 | 133/135 | 7/135  | 1/135 | 1/135 | 1/135 |      |      |
| 1  | Treponema pallidum Nichols                                                       | 2/80  | 0/2  | 0/2  | 0/2  | 0/2  | 0/6  | 0/2  | 0/6  | 0/2  | 0/6  | 0/2  | 0/8  | 0/4  | 0/2  | 0/4  | 0/2  | 0/6  | 0/2  | 0/8  | 0/10 | 0/4  | 0/2  | 0/10 | 0/0  | 0/0  | 0/0  | 0/0  | 0/0  | 45/80   | 43/80   | 2/80   | 2/80  | 2/80  | 2/80  |      |      |
| 1  | Treponema pallidum subsp. pallidum SS14                                          | 2/80  | 0/2  | 0/2  | 0/2  | 0/2  | 0/6  | 0/2  | 0/6  | 0/2  | 0/6  | 0/2  | 0/8  | 0/4  | 0/2  | 0/4  | 0/2  | 0/6  | 0/2  | 0/8  | 0/10 | 0/4  | 0/2  | 0/10 | 0/0  | 0/0  | 0/0  | 0/0  | 0/0  | 45/80   | 43/80   | 2/80   | 2/80  | 2/80  | 2/80  |      |      |
| 1  | Treponema pallidum subsp. pallidum DAL-1                                         | 1/45  | 0/1  | 0/1  | 0/1  | 0/1  | 0/2  | 0/3  | 0/1  | 0/1  | 0/3  | 0/1  | 0/4  | 0/2  | 0/1  | 0/2  | 0/1  | 0/3  | 0/1  | 0/3  | 0/5  | 0/2  | 0/1  | 0/5  | 0/0  | 0/0  | 0/0  | 0/0  | 0/0  | 28/45   | 18/45   | 1/45   | 1/45  | 1/45  | 1/45  |      |      |
| 1  | Treponema pallidum subsp. pallidum str. Chicago                                  | 1/45  | 0/1  | 0/1  | 0/1  | 0/1  | 0/2  | 0/3  | 0/1  | 0/1  | 0/3  | 0/1  | 0/4  | 0/2  | 0/1  | 0/2  | 0/1  | 0/3  | 0/1  | 0/3  | 0/5  | 0/2  | 0/1  | 0/5  | 0/0  | 0/0  | 0/0  | 0/0  | 0/0  | 28/45   | 18/45   | 1/45   | 1/45  | 1/45  | 1/45  |      |      |
| 1  | Treponema pallidum subsp. pallidum Mexico A                                      | 1/45  | 0/1  | 0/1  | 0/1  | 0/1  | 0/2  | 0/3  | 0/1  | 0/1  | 0/3  | 0/1  | 0/4  | 0/2  | 0/1  | 0/2  | 0/1  | 0/3  | 0/1  | 0/3  | 0/5  | 0/2  | 0/1  | 0/5  | 0/0  | 0/0  | 0/0  | 0/0  | 0/0  | 0/0     | 28/45   | 18/45  | 1/45  | 1/45  | 1/45  | 1/45 |      |
| 3  | "Treponema pallidum subsp. pertenue" Smbert 1984                                 | 0/135 | 0/3  | 0/3  | 0/3  | 0/3  | 0/6  | 0/9  | 0/3  | 0/3  | 0/9  | 0/3  | 0/12 | 0/6  | 0/3  | 0/6  | 0/3  | 0/9  | 0/3  | 0/9  | 0/15 | 0/6  | 0/3  | 0/15 | 0/0  | 0/0  | 0/0  | 0/0  | 0/0  | 78/135  | 54/135  | 3/135  | 1/135 | 1/135 | 1/135 |      |      |
| 1  | Treponema pallidum subsp. pertenue Samad                                         | 1/45  | 0/1  | 0/1  | 0/1  | 0/1  | 0/2  | 0/3  | 0/1  | 0/1  | 0/3  | 0/1  | 0/4  | 0/2  | 0/1  | 0/2  | 0/1  | 0/3  | 0/1  | 0/3  | 0/5  | 0/2  | 0/1  | 0/5  | 0/0  | 0/0  | 0/0  | 0/0  | 0/0  | 28/45   | 18/45   | 1/45   | 1/45  | 1/45  | 1/45  |      |      |
| 1  | Treponema pallidum subsp. pertenue CDC2                                          | 1/45  | 0/1  | 0/1  | 0/1  | 0/1  | 0/2  | 0/3  | 0/1  | 0/1  | 0/3  | 0/1  | 0/4  | 0/2  | 0/1  | 0/2  | 0/1  | 0/3  | 0/1  | 0/3  | 0/5  | 0/2  | 0/1  | 0/5  | 0/0  | 0/0  | 0/0  | 0/0  | 0/0  | 28/45   | 18/45   | 1/45   | 1/45  | 1/45  | 1/45  |      |      |
| 1  | Treponema pallidum subsp. pertenue Gauthier                                      | 1/45  | 0/1  | 0/1  | 0/1  | 0/1  | 0/2  | 0/3  | 0/1  | 0/1  | 0/3  | 0/1  | 0/4  | 0/2  | 0/1  | 0/2  | 0/1  | 0/3  | 0/1  | 0/3  | 0/5  | 0/2  | 0/1  | 0/5  | 0/0  | 0/0  | 0/0  | 0/0  | 0/0  | 28/45   | 18/45   | 1/45   | 1/45  | 1/45  | 1/45  |      |      |
| 1  | Treponema pallidum str. Fribourg-Blanc                                           | 1/45  | 0/1  | 0/1  | 0/1  | 0/1  | 0/2  | 0/3  | 0/1  | 0/1  | 0/3  | 0/1  | 0/4  | 0/2  | 0/1  | 0/2  | 0/1  | 0/3  | 0/1  | 0/3  | 0/5  | 0/2  | 0/1  | 0/5  | 0/0  | 0/0  | 0/0  | 0/0  | 0/0  | 28/45   | 18/45   | 1/45   | 1/45  | 1/45  | 1/45  |      |      |
| 1  | ATCC 33096                                                                       | 0/45  | 0/1  | 0/1  | 0/1  | 0/2  | 0/3  | 0/1  | 0/1  | 0/4  | 0/1  | 0/3  | 0/2  | 0/1  | 0/2  | 0/1  | 0/3  | 0/1  | 0/3  | 0/5  | 0/2  | 0/1  | 0/5  | 0/0  | 0/0  | 0/0  | 0/0  | 0/0  | 0/0  | 0/0     | 28/45   | 18/45  | 1/45  | 1/45  | 1/45  | 1/45 |      |
| 1  | Treponema suisfaciens 6091                                                       | 0/45  | 0/1  | 0/1  | 0/1  | 0/2  | 0/3  | 0/1  | 0/1  | 0/4  | 0/1  | 0/3  | 0/2  | 0/1  | 0/2  | 0/1  | 0/3  | 0/1  | 0/3  | 0/5  | 0/2  | 0/1  | 0/5  | 0/0  | 0/0  | 0/0  | 0/0  | 0/0  | 0/0  | 0/0     | 28/45   | 18/45  | 1/45  | 1/45  | 1/45  | 1/45 |      |
| 1  | "Spirochaeta cuniculi" Levaditi, Marie and Isacu 1921                            | 0/45  | 0/1  | 0/1  | 0/1  | 0/1  | 0/2  | 0/3  | 0/1  | 0/1  | 0/3  | 0/1  | 0/4  | 0/2  | 0/1  | 0/2  | 0/1  | 0/3  | 0/1  | 0/3  | 0/5  | 0/2  | 0/1  | 0/5  | 0/0  | 0/0  | 0/0  | 0/0  | 0/0  | 0/0     | 28/45   | 18/45  | 1/45  | 1/45  | 1/45  | 1/45 |      |
| 1  | Treponema parviloculiculi Cuniculi A                                             | 0/45  | 0/1  | 0/1  | 0/1  | 0/1  | 0/2  | 0/3  | 0/1  | 0/1  | 0/3  | 0/1  | 0/4  | 0/2  | 0/1  | 0/2  | 0/1  | 0/3  | 0/1  | 0/3  | 0/5  | 0/2  | 0/1  | 0/5  | 0/0  | 0/0  | 0/0  | 0/0  | 0/0  | 0/0     | 28/45   | 18/45  | 1/45  | 1/45  | 1/45  | 1/45 |      |
| 1  | CIP 105900                                                                       | 0/47  | 0/1  | 0/1  | 0/1  | 0/2  | 0/3  | 0/1  | 0/1  | 0/4  | 0/1  | 0/4  | 0/2  | 0/1  | 0/2  | 0/1  | 0/3  | 0/1  | 0/3  | 0/5  | 0/2  | 0/1  | 0/5  | 0/0  | 0/0  | 0/0  | 0/0  | 0/0  | 0/0  | 28/47   | 17/47   | 1/47   | 1/47  | 1/47  | 1/47  |      |      |
| 1  | Treponema brennaborense DSM 12168                                                | 0/47  | 0/1  | 0/1  | 0/1  | 0/2  | 0/3  | 0/1  | 0/1  | 0/4  | 0/1  | 0/4  | 0/2  | 0/1  | 0/2  | 0/1  | 0/3  | 0/1  | 0/3  | 0/5  | 0/2  | 0/1  | 0/5  | 0/0  | 0/0  | 0/0  | 0/0  | 0/0  | 0/0  | 0/0     | 28/47   | 17/47  | 1/47  | 1/47  | 1/47  | 1/47 |      |
| 1  | ATCC BAA-887                                                                     | 0/50  | 0/1  | 0/1  | 0/1  | 0/2  | 0/4  | 0/3  | 0/1  | 0/1  | 0/3  | 0/1  | 0/4  | 0/2  | 0/1  | 0/2  | 0/1  | 0/3  | 0/1  | 0/3  | 0/5  | 0/2  | 0/1  | 0/6  | 0/0  | 0/0  | 0/0  | 0/0  | 0/0  | 0/0     | 30/50   | 19/50  | 1/50  | 1/50  | 1/50  | 1/50 |      |
| 1  | Treponema primitia ZAS-2                                                         | 0/48  | 0/1  | 0/1  | 0/1  | 0/1  | 0/2  | 0/3  | 0/1  | 0/1  | 0/4  | 0/1  | 0/4  | 0/2  | 0/1  | 0/2  | 0/1  | 0/3  | 0/1  | 0/3  | 0/5  | 0/2  | 0/1  | 0/6  | 0/0  | 0/0  | 0/0  | 0/0  | 0/0  | 0/0     | 30/48   | 20/48  | 2/48  | 2/48  | 2/48  | 2/48 |      |
| 1  | ATCC BAA-888                                                                     | 0/48  | 0/1  | 0/1  | 0/1  | 0/1  | 0/2  | 0/3  | 0/1  | 0/1  | 0/4  | 0/1  | 0/4  | 0/2  | 0/1  | 0/2  | 0/1  | 0/3  | 0/1  | 0/3  | 0/5  | 0/2  | 0/1  | 0/6  | 0/0  | 0/0  | 0/0  | 0/0  | 0/0  | 0/0     | 0/0     | 30/48  | 20/48 | 2/48  | 2/48  | 2/48 | 2/48 |
| 1  | Treponema azotonutricum ZAS-9                                                    | 0/48  | 0/1  | 0/1  | 0/1  | 0/1  | 0/2  | 0/3  | 0/1  | 0/1  | 0/4  | 0/1  | 0/4  | 0/2  | 0/1  | 0/2  | 0/1  | 0/3  | 0/1  | 0/3  | 0/5  | 0/2  | 0/1  | 0/6  | 0/0  | 0    |      |      |      |         |         |        |       |       |       |      |      |

Table with columns for Accession Number, Organism Name, and a grid of binary values (0.00, 0.00, etc.). The table lists various Mycoplasma species and their related sequences, including Mycoplasma pneumoniae, Mycoplasma fermentans, Mycoplasma genitalium, and Mycoplasma hominis. Each entry is followed by a dense matrix of values representing sequence similarity or presence of specific markers.
